# Supplementary material for: Phragmalin-type limonoids from the roots of Trichilia sinensis
Source: Royal Society of Chemistry journal article supplement (doi:10.1039/c7ra01785e), 2017-01-01
Supplement: c7ra01785e1.pdf [file c7ra01785e1.pdf]

## Supporting Information

### **Phragmalin-Type limonoids from the roots of *Trichilia sinensis***

Shou-Bai Liu<sup>†</sup>, Hui-Qin Chen<sup>†</sup>, Zhi-Kai Guo, Wen-Hua Dong, Jun Wang, Wen-Li

Mei<sup>\*</sup>, Hao-Fu Dai<sup>\*</sup>

Laboratory of Biology and Genetic Resources of Tropical Crops, Ministry of Agriculture, Institute of Tropical Bioscience and Biotechnology, Chinese Academy of Tropical Agricultural Sciences, Haikou 571101, P. R. China

<sup>†</sup>These authors contributed equally to this work.

<sup>\*</sup> To whom correspondence should be addressed. Tel: +86-898-66961869. Fax: +86-898-66961869. E-mail: [meiwenli@itbb.org.cn](mailto:meiwenli@itbb.org.cn), [daihaofu@itbb.org.cn](mailto:daihaofu@itbb.org.cn)

Figure S1.  $^1\text{H}$  NMR (500 MHz,  $\text{CDCl}_3$ ) spectrum of compound **1**

Figure S2.  $^{13}\text{C}$  NMR (125 MHz,  $\text{CDCl}_3$ ) spectrum of compound **1**

Figure S3. HSQC spectrum of compound **1** in  $\text{CDCl}_3$

Figure S4.  $^1\text{H}$ - $^1\text{H}$  COSY spectrum of compound **1** in  $\text{CDCl}_3$

Figure S5. HMBC spectrum of compound **1** in  $\text{CDCl}_3$

Figure S6. ROESY spectrum of compound **1** in  $\text{CDCl}_3$

Figure S7. HREI-MS spectrum of compound **1**

Figure S8.  $^1\text{H}$  NMR (500 MHz,  $\text{CDCl}_3$ ) spectrum of compound **2**

Figure S9.  $^{13}\text{C}$  NMR (125 MHz,  $\text{CDCl}_3$ ) spectrum of compound **2**

Figure S10. HSQC spectrum of compound **2** in  $\text{CDCl}_3$

Figure S11.  $^1\text{H}$ - $^1\text{H}$  COSY spectrum of compound **2** in  $\text{CDCl}_3$

Figure S12. HMBC spectrum of compound **2** in  $\text{CDCl}_3$

Figure S13. ROESY spectrum of compound **2** in  $\text{CDCl}_3$

Figure S14. HRESI-MS spectrum of compound **2**

Figure S15.  $^1\text{H}$  NMR (500 MHz,  $\text{CDCl}_3$ ) spectrum of compound **3**

Figure S16.  $^{13}\text{C}$  NMR (125 MHz,  $\text{CDCl}_3$ ) spectrum of compound **3**

Figure S17. HSQC spectrum of compound **3** in  $\text{CDCl}_3$

Figure S18.  $^1\text{H}$ - $^1\text{H}$  COSY spectrum of compound **3** in  $\text{CDCl}_3$

Figure S19. HMBC spectrum of compound **3** in  $\text{CDCl}_3$

Figure S20. ROESY spectrum of compound **3** in  $\text{CDCl}_3$

Figure S21. HRESI-MS spectrum of compound **3**

Figure S22.  $^1\text{H}$  NMR (500 MHz,  $\text{CDCl}_3$ ) spectrum of compound **4**

Figure S23.  $^{13}\text{C}$  NMR (125 MHz,  $\text{CDCl}_3$ ) spectrum of compound **4**

Figure S24. HSQC spectrum of compound **4** in  $\text{CDCl}_3$

Figure S25.  $^1\text{H}$ - $^1\text{H}$  COSY spectrum of compound **4** in  $\text{CDCl}_3$

Figure S26. HMBC spectrum of compound **4** in  $\text{CDCl}_3$

Figure S27. ROESY spectrum of compound **4** in  $\text{CDCl}_3$

Figure S28. HRESI-MS spectrum of compound **4**

Figure S29.  $^1\text{H}$  NMR (500 MHz,  $\text{CDCl}_3$ ) spectrum of compound **5**

Figure S30.  $^{13}\text{C}$  NMR (125 MHz,  $\text{CDCl}_3$ ) spectrum of compound **5**

Figure S31. HSQC spectrum of compound **5** in  $\text{CDCl}_3$

Figure S32.  $^1\text{H}$ - $^1\text{H}$  COSY spectrum of compound **5** in  $\text{CDCl}_3$

Figure S33. HMBC spectrum of compound **5** in  $\text{CDCl}_3$

Figure S34. ROESY spectrum of compound **5** in  $\text{CDCl}_3$

Figure S35. HRESI-MS spectrum of compound **5**

Figure S36.  $^1\text{H}$  NMR (500 MHz,  $\text{CDCl}_3$ ) spectrum of compound **6**

Figure S37.  $^{13}\text{C}$  NMR (125 MHz,  $\text{CDCl}_3$ ) spectrum of compound **6**

Figure S38. HSQC spectrum of compound **6** in  $\text{CDCl}_3$

Figure S39.  $^1\text{H}$ - $^1\text{H}$  COSY spectrum of compound **6** in  $\text{CDCl}_3$

Figure S40. HMBC spectrum of compound **6** in  $\text{CDCl}_3$

Figure S41. ROESY spectrum of compound **6** in  $\text{CDCl}_3$

Figure S42. HRESI-MS spectrum of compound **6**

Figure S43.  $^1\text{H}$  NMR (500 MHz,  $\text{CDCl}_3$ ) spectrum of compound **7**

Figure S44.  $^{13}\text{C}$  NMR (125 MHz,  $\text{CDCl}_3$ ) spectrum of compound **7**

Figure S45. HSQC spectrum of compound **7** in  $\text{CDCl}_3$

Figure S46.  $^1\text{H}$ - $^1\text{H}$  COSY spectrum of compound **7** in  $\text{CDCl}_3$

Figure S47. HMBC spectrum of compound **7** in  $\text{CDCl}_3$

Figure S48. ROESY spectrum of compound **7** in  $\text{CDCl}_3$

Figure S49. HRESI-MS spectrum of compound **7**

Figure S50.  $^1\text{H}$  NMR (500 MHz,  $\text{CDCl}_3$ ) spectrum of compound **9**

Figure S51.  $^{13}\text{C}$  NMR (125 MHz,  $\text{CDCl}_3$ ) spectrum of compound **9**

Figure S52. HSQC spectrum of compound **9** in  $\text{CDCl}_3$

Figure S53.  $^1\text{H}$ - $^1\text{H}$  COSY spectrum of compound **9** in  $\text{CDCl}_3$

Figure S54. HMBC spectrum of compound **9** in  $\text{CDCl}_3$

Figure S55. ROESY spectrum of compound **9** in  $\text{CDCl}_3$

Figure S56. HRESI-MS spectrum of compound **9**

Figure S57.  $^1\text{H}$  NMR (500 MHz,  $\text{CDCl}_3$ ) spectrum of compound **10**

Figure S58.  $^{13}\text{C}$  NMR (125 MHz,  $\text{CDCl}_3$ ) spectrum of compound **10**

Figure S59. HSQC spectrum of compound **10** in  $\text{CDCl}_3$

Figure S60.  $^1\text{H}$ - $^1\text{H}$  COSY spectrum of compound **10** in  $\text{CDCl}_3$

Figure S61. HMBC spectrum of compound **10** in  $\text{CDCl}_3$

Figure S62. ROESY spectrum of compound **10** in  $\text{CDCl}_3$

Figure S63. HRESI-MS spectrum of compound **10**

Figure S64.  $^1\text{H}$  NMR (500 MHz,  $\text{CDCl}_3$ ) spectrum of compound **11**

Figure S65.  $^{13}\text{C}$  NMR (125 MHz,  $\text{CDCl}_3$ ) spectrum of compound **11**

Figure S66. HSQC spectrum of compound **11** in CDCl<sub>3</sub>

Figure S67. <sup>1</sup>H-<sup>1</sup>H COSY spectrum of compound **11** in CDCl<sub>3</sub>

Figure S68. HMBC spectrum of compound **11** in CDCl<sub>3</sub>

Figure S69. ROESY spectrum of compound **11** in CDCl<sub>3</sub>

Figure S70. HRESI-MS spectrum of compound **11**

Figure S71. <sup>1</sup>H NMR (500 MHz, CDCl<sub>3</sub>) spectrum of compound **12**

Figure S72. <sup>13</sup>C NMR (125 MHz, CDCl<sub>3</sub>) spectrum of compound **12**

Figure S73. HSQC spectrum of compound **12** in CDCl<sub>3</sub>

Figure S74. <sup>1</sup>H-<sup>1</sup>H COSY spectrum of compound **12** in CDCl<sub>3</sub>

Figure S75. HMBC spectrum of compound **12** in CDCl<sub>3</sub>

Figure S76. ROESY spectrum of compound **12** in CDCl<sub>3</sub>

Figure S77. HRESI-MS spectrum of compound **12**

Figure S78. <sup>1</sup>H NMR (500 MHz, CDCl<sub>3</sub>) spectrum of compound **13**

Figure S79. <sup>13</sup>C NMR (125 MHz, CDCl<sub>3</sub>) spectrum of compound **13**

Figure S80. HSQC spectrum of compound **13** in CDCl<sub>3</sub>

Figure S81. <sup>1</sup>H-<sup>1</sup>H COSY spectrum of compound **13** in CDCl<sub>3</sub>

Figure S82. HMBC spectrum of compound **13** in CDCl<sub>3</sub>

Figure S83. ROESY spectrum of compound **13** in CDCl<sub>3</sub>

Figure S84. HRESI-MS spectrum of compound **13**

Figure S85. <sup>1</sup>H NMR (500 MHz, CDCl<sub>3</sub>) spectrum of compound **14**

Figure S86. <sup>13</sup>C NMR (125 MHz, CDCl<sub>3</sub>) spectrum of compound **14**

Figure S87. HSQC spectrum of compound **14** in CDCl<sub>3</sub>

Figure S88.  $^1\text{H}$ - $^1\text{H}$  COSY spectrum of compound **14** in  $\text{CDCl}_3$

Figure S89. HMBC spectrum of compound **14** in  $\text{CDCl}_3$

Figure S90. ROESY spectrum of compound **14** in  $\text{CDCl}_3$

Figure S91. HRESI-MS spectrum of compound **14**

Figure S1.  $^1\text{H}$  NMR (500 MHz,  $\text{CDCl}_3$ ) spectrum of compound **1**

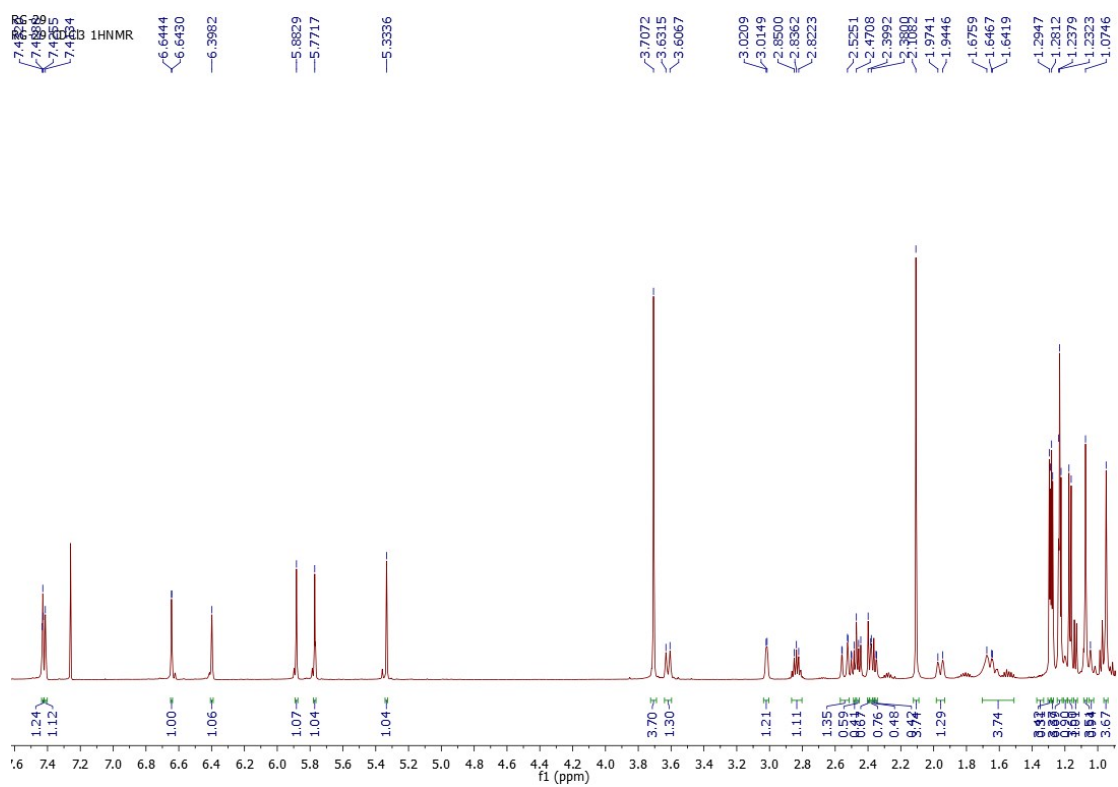

Figure S2.  $^{13}\text{C}$  NMR (125 MHz,  $\text{CDCl}_3$ ) spectrum of compound **1**

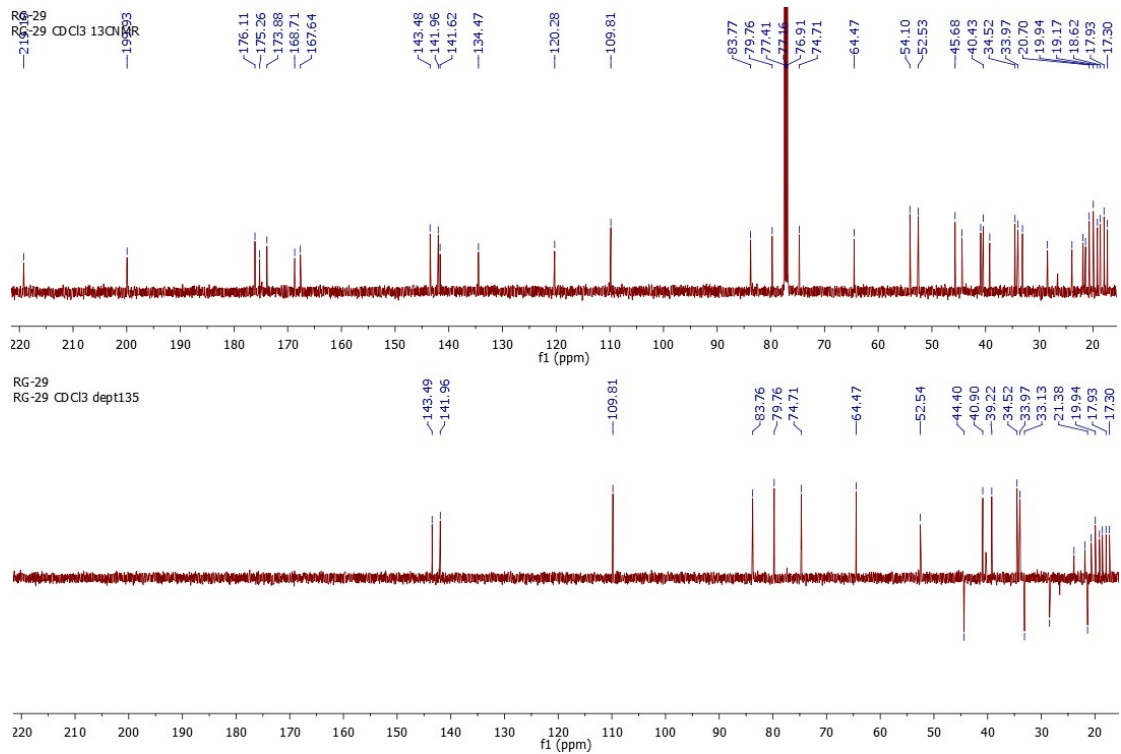

Figure S3. HSQC spectrum of compound **1** in CDCl<sub>3</sub>

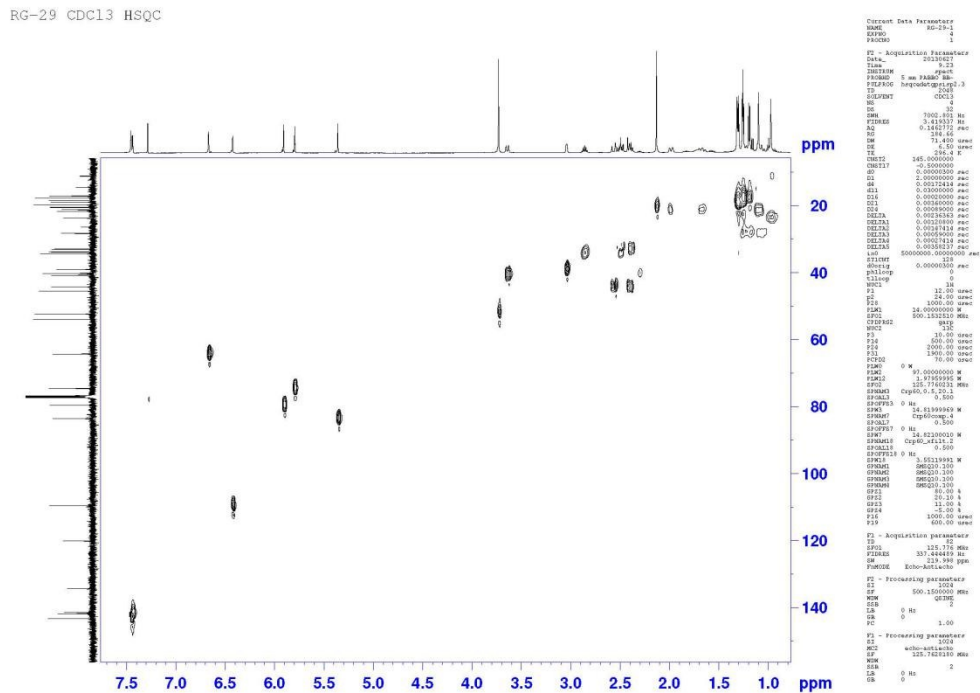

Figure S4. <sup>1</sup>H-<sup>1</sup>H COSY spectrum of compound **1** in CDCl<sub>3</sub>

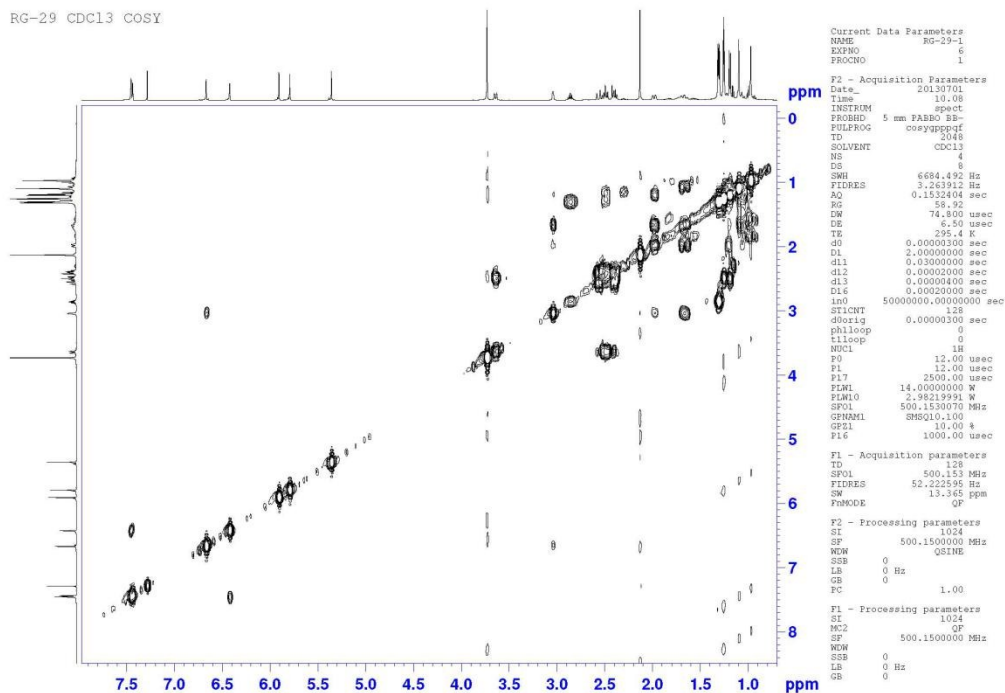

Figure S5. HMBC spectrum of compound **1** in CDCl<sub>3</sub>

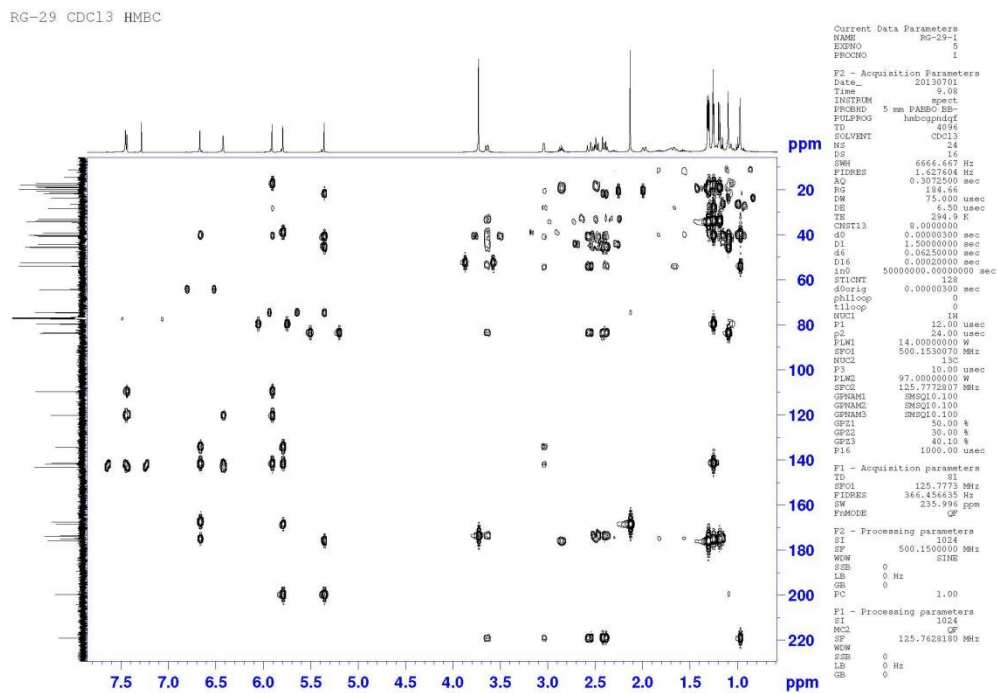

Figure S6. ROESY spectrum of compound **1** in CDCl<sub>3</sub>



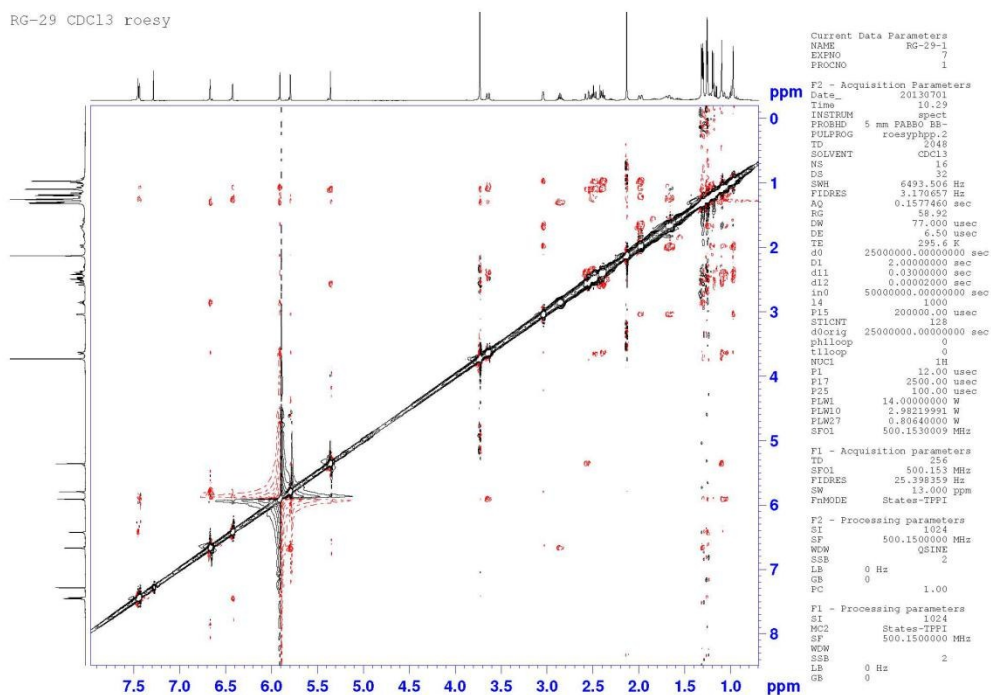

Figure S7. HREI-MS spectrum of compound 1

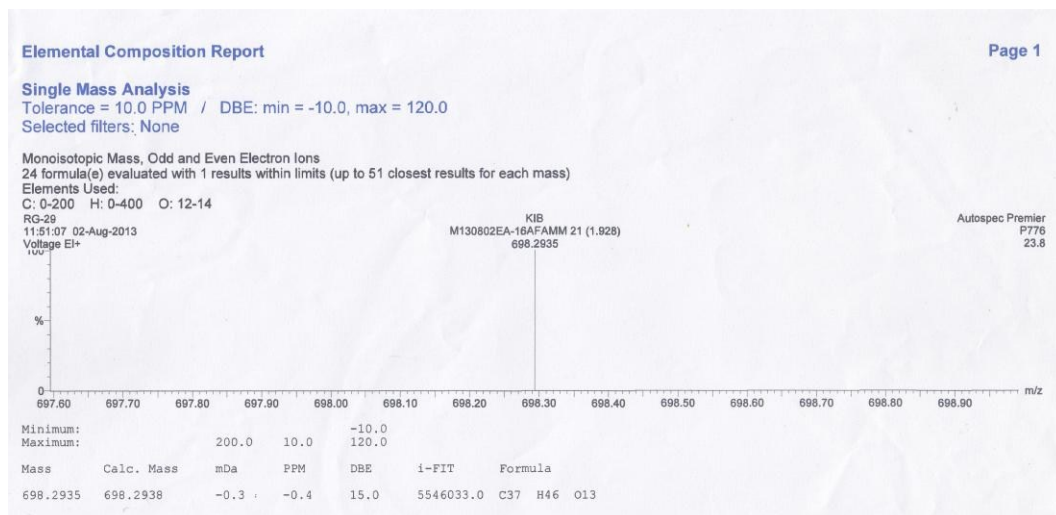

Figure S8. <sup>1</sup>H NMR (500 MHz, CDCl<sub>3</sub>) spectrum of compound 2

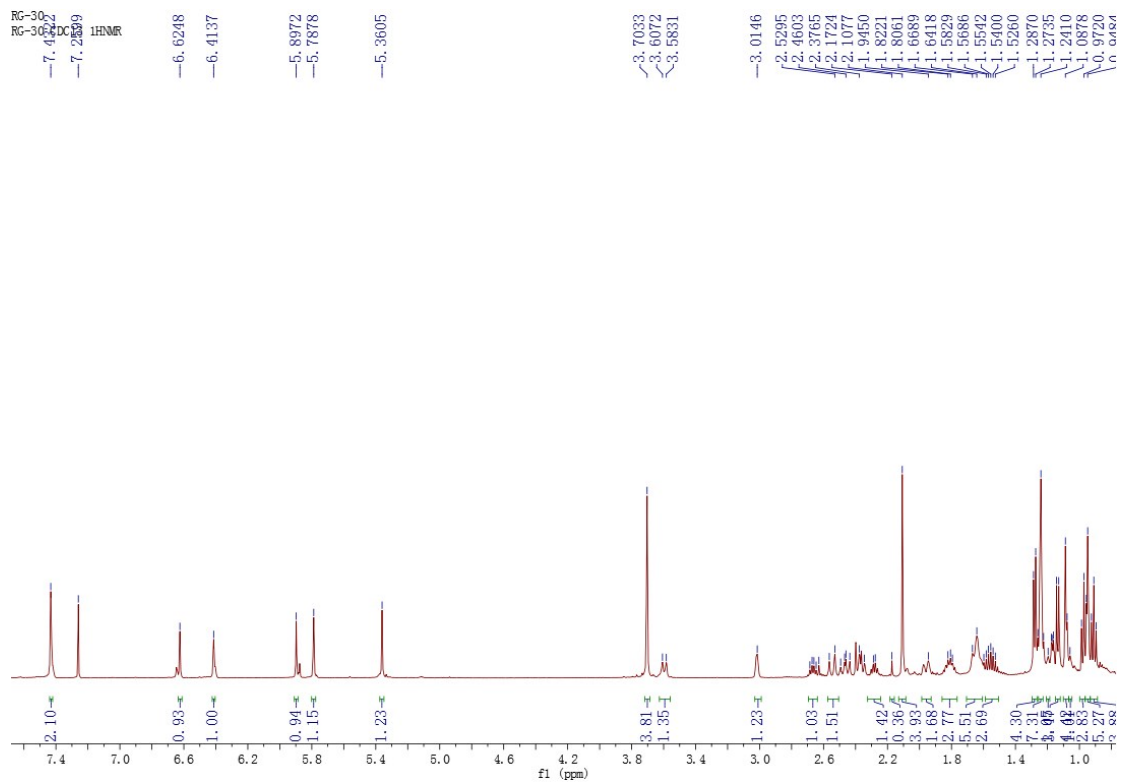

Figure S9. <sup>13</sup>C NMR (125 MHz, CDCl<sub>3</sub>) spectrum of compound **2**

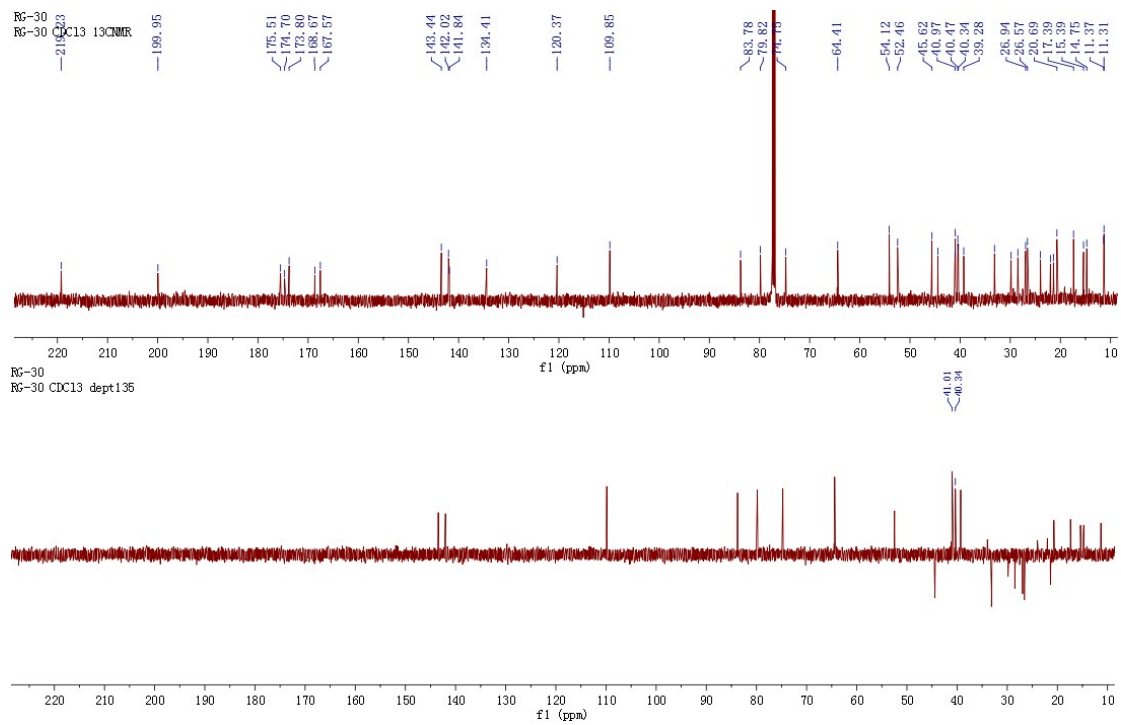

Figure S10. HSQC spectrum of compound **2** in CDCl<sub>3</sub>

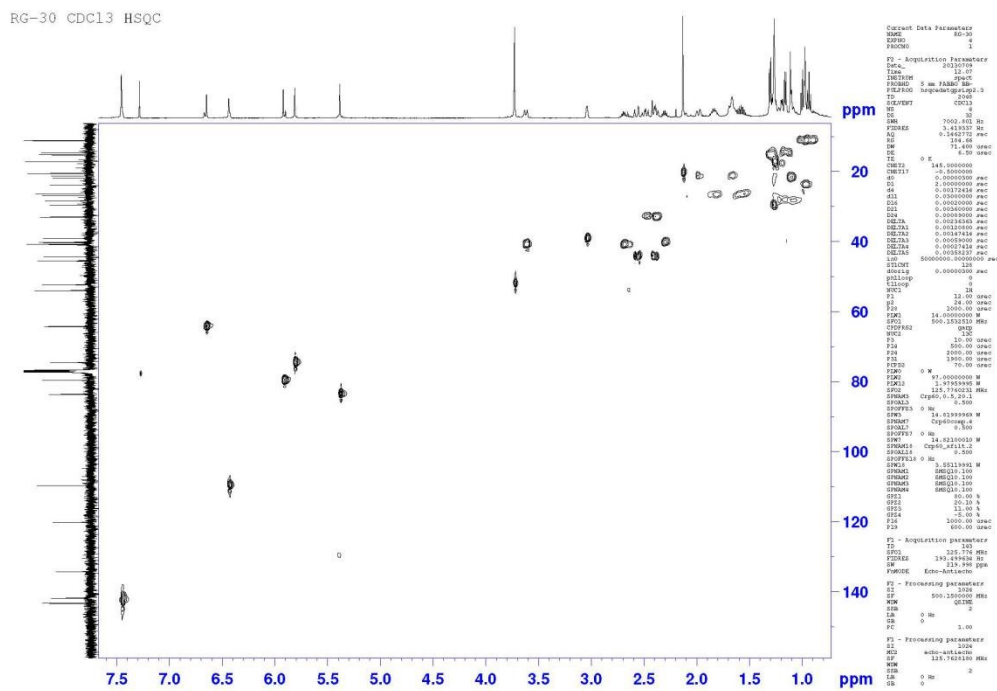

Figure S11. <sup>1</sup>H-<sup>1</sup>H COSY spectrum of compound **2** in CDCl<sub>3</sub>

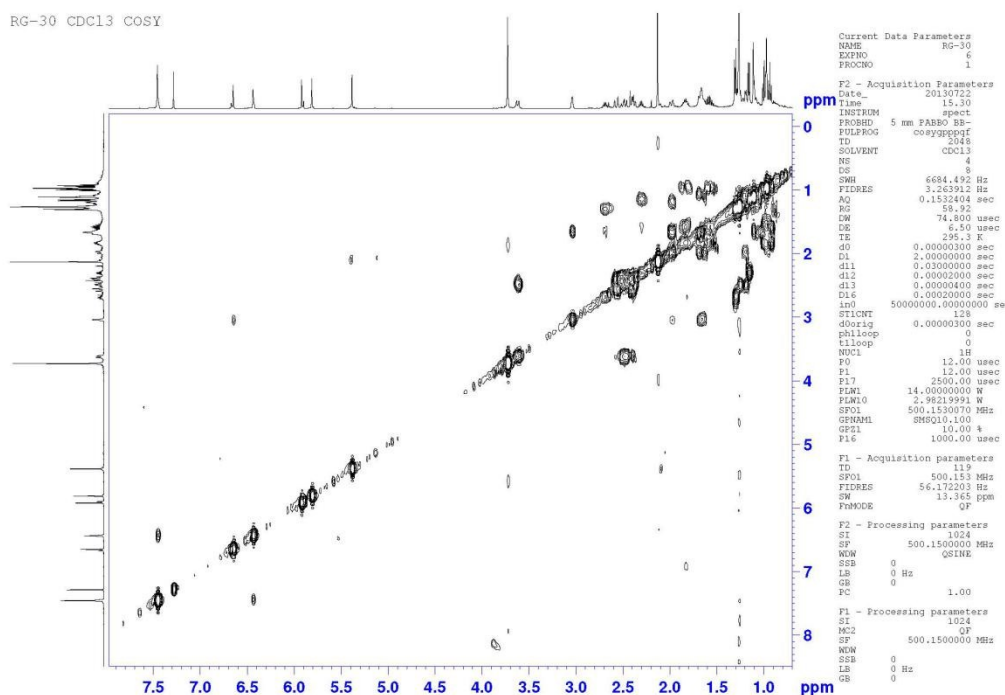

Figure S12. HMBC spectrum of compound **2** in CDCl<sub>3</sub>

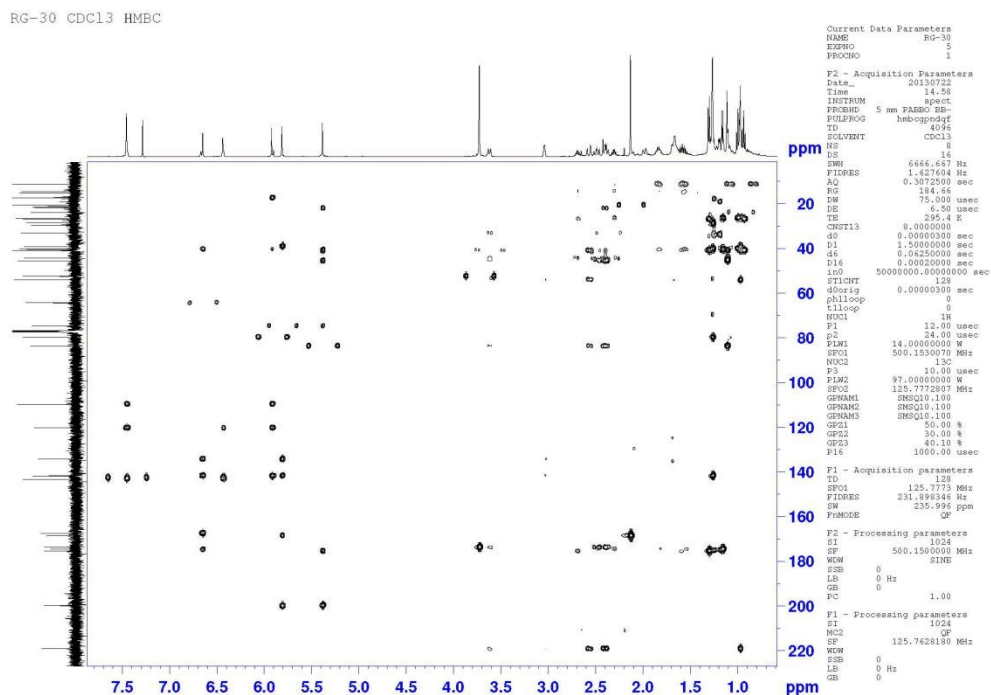

Figure S13. ROESY spectrum of compound **2** in CDCl<sub>3</sub>

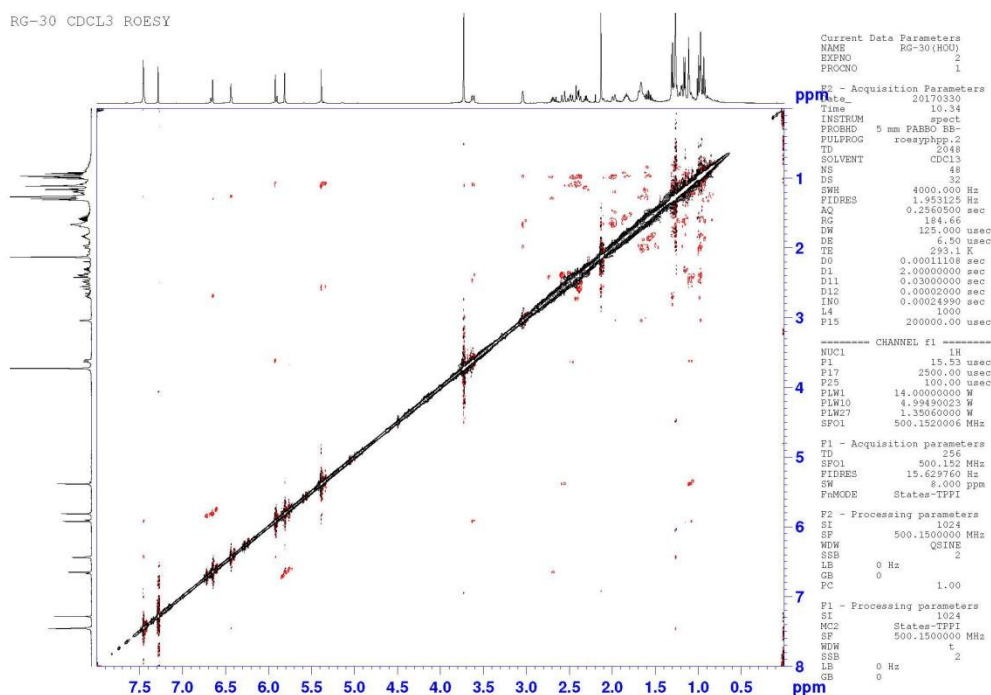

Figure S14. HRESI-MS spectrum of compound 2

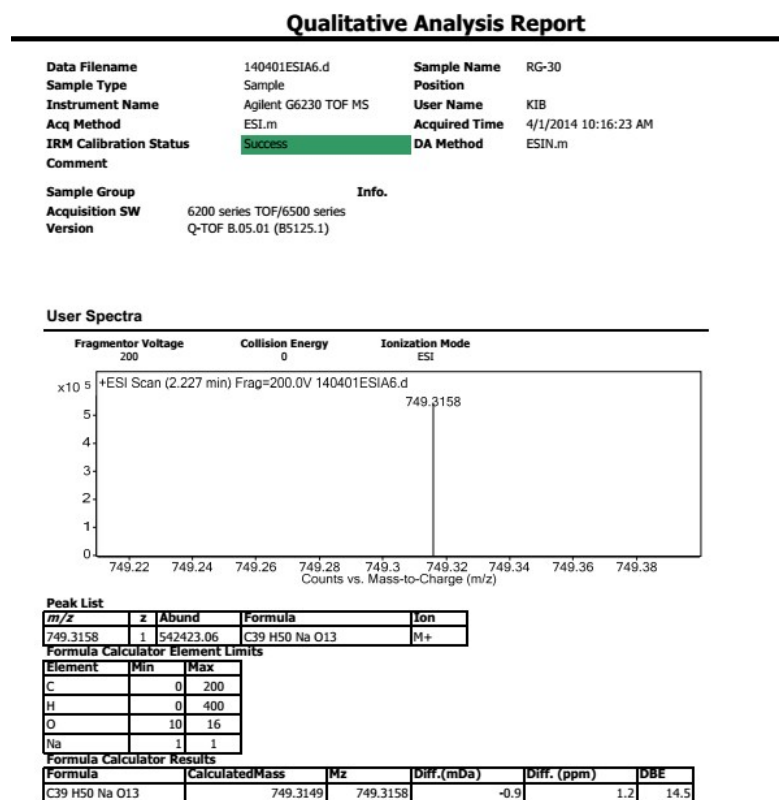

Figure S15. <sup>1</sup>H NMR (500 MHz, CDCl<sub>3</sub>) spectrum of compound 3

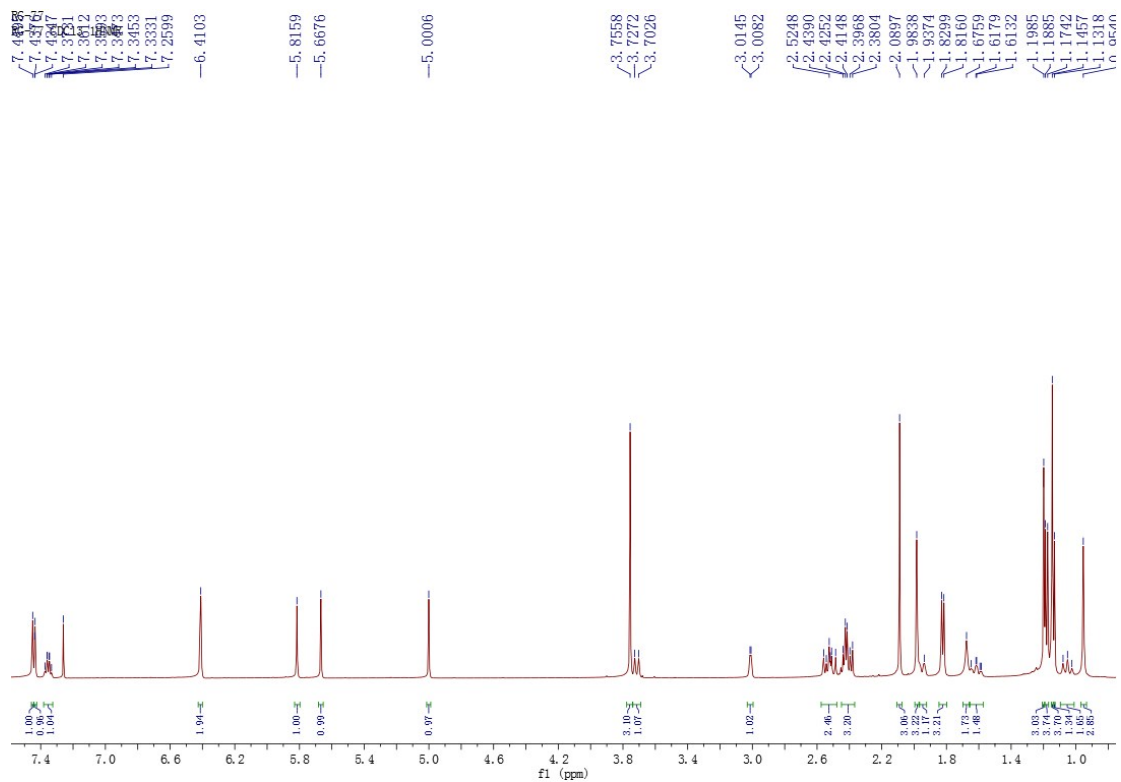

Figure S16.  $^{13}\text{C}$  NMR (125 MHz,  $\text{CDCl}_3$ ) spectrum of compound **3**

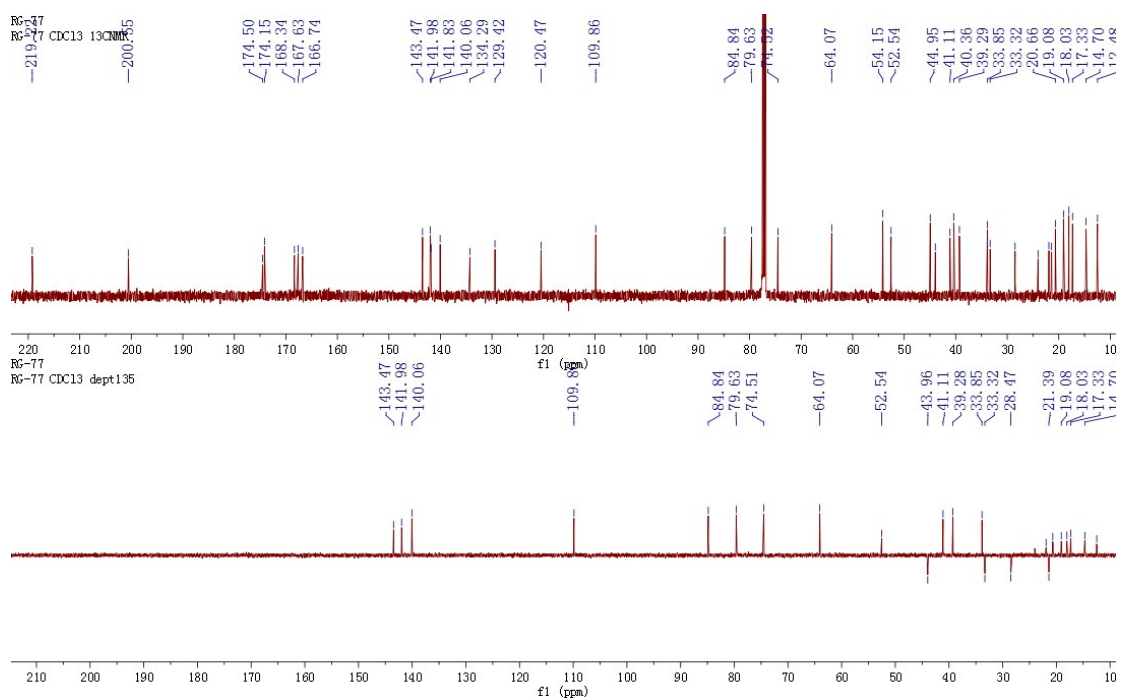

Figure S17. HSQC spectrum of compound **3** in  $\text{CDCl}_3$

RG-77 CDCl3 HSQC

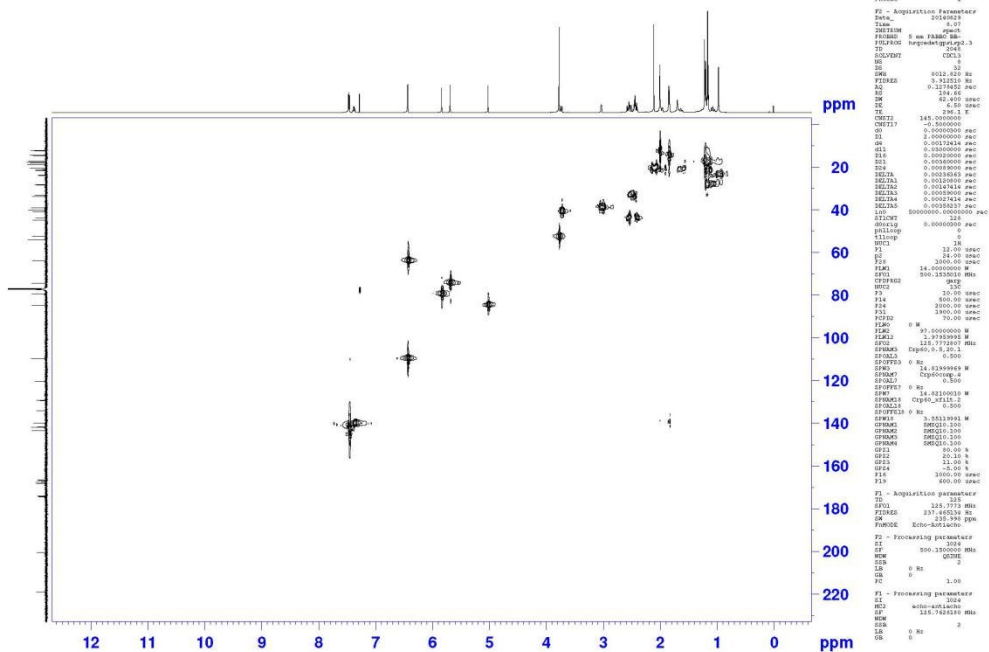

Figure S18.  $^1\text{H}$ - $^1\text{H}$  COSY spectrum of compound **3** in  $\text{CDCl}_3$

RG-77 CDCl3 COSY

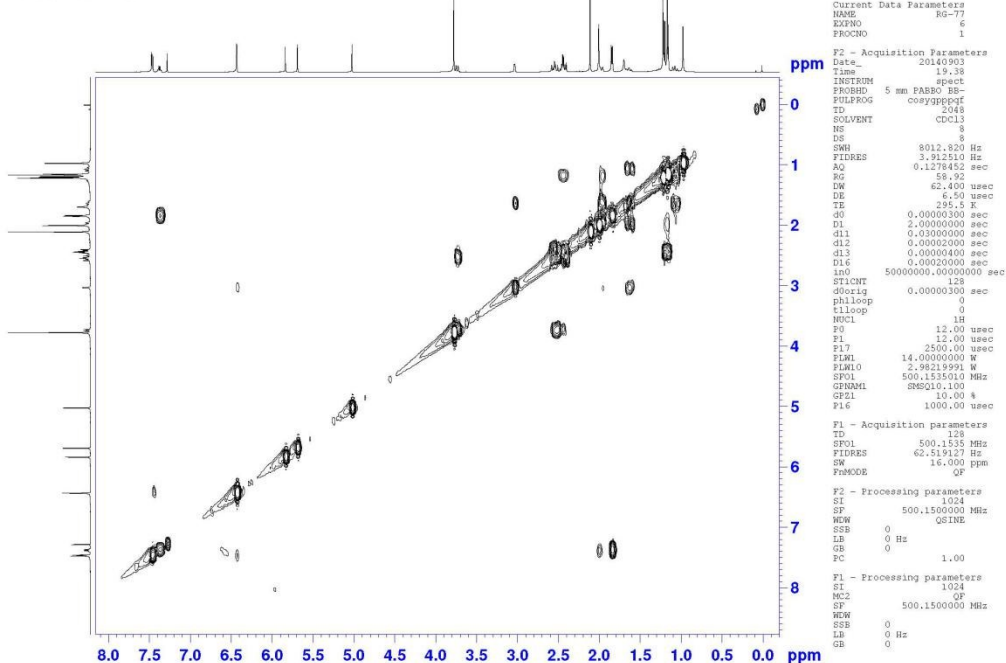

Figure S19. HMBC spectrum of compound **3** in  $\text{CDCl}_3$

RG-77 CDCL3 HMBC

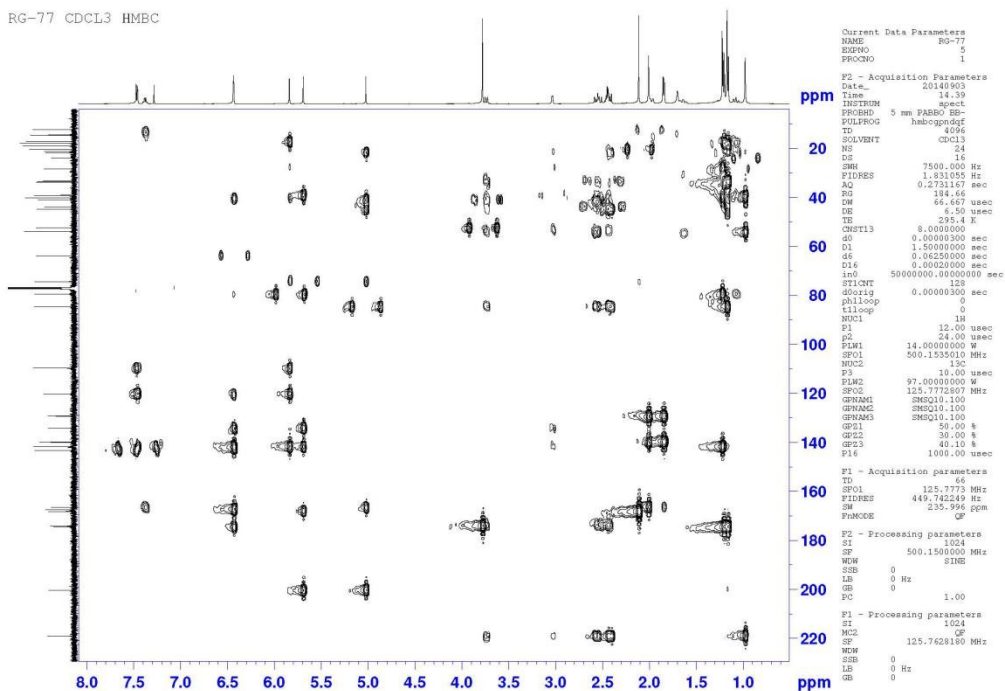

Figure S20. ROESY spectrum of compound 3 in CDCl<sub>3</sub>

RG-77 CDCL3 roesy

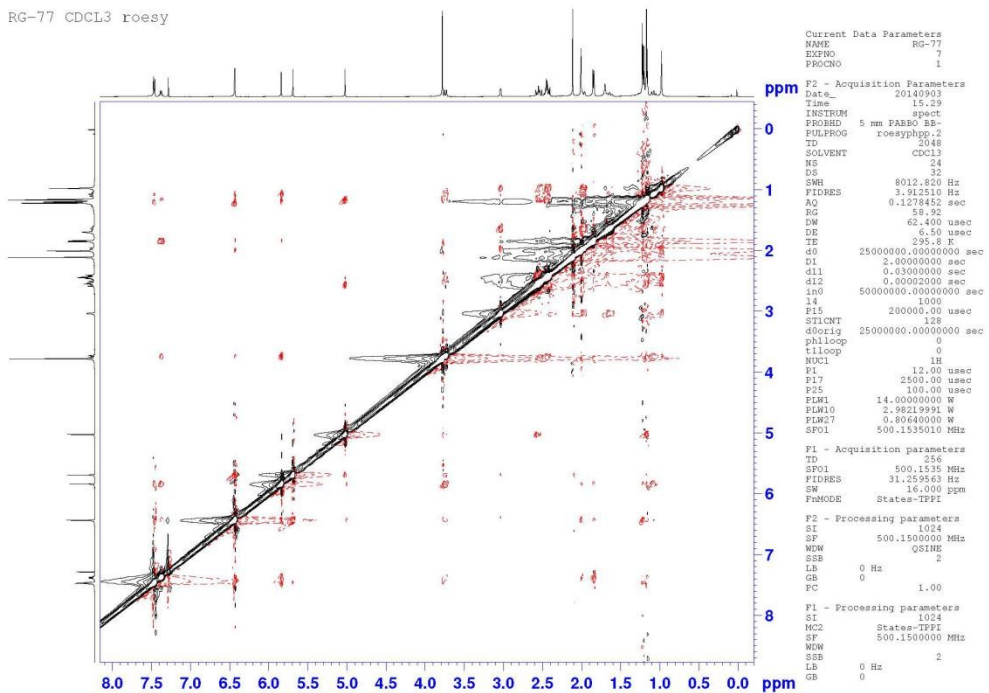

Figure S21. HRESI-MS spectrum of compound 3



## Qualitative Analysis Report

|                               |              |                      |                      |
|-------------------------------|--------------|----------------------|----------------------|
| <b>Data Filename</b>          | RG-77.d      | <b>Sample Name</b>   | RG-77                |
| <b>Sample Type</b>            | Sample       | <b>Position</b>      | P1-A5                |
| <b>Instrument Name</b>        | Instrument 1 | <b>User Name</b>     |                      |
| <b>Acq Method</b>             | SIBU.m       | <b>Acquired Time</b> | 8/27/2015 3:06:06 PM |
| <b>IRM Calibration Status</b> | Success      | <b>DA Method</b>     | Default.m            |
| <b>Comment</b>                |              |                      |                      |

**Sample Group** Info.  
**Acquisition SW** 6200 series TOF/6500 series  
**Version** Q-TOF B.05.01 (B5125.2)

### User Spectra

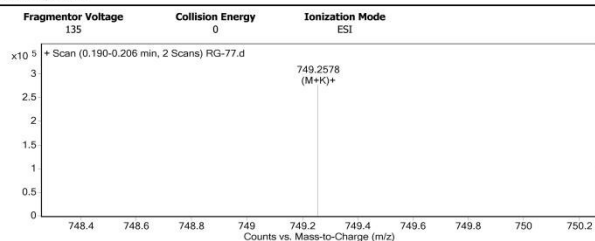

| m/z      | z | Abund     | Formula     | Ion    |
|----------|---|-----------|-------------|--------|
| 728.3284 | 1 | 131090.28 |             |        |
| 729.3316 | 1 | 51852.3   |             |        |
| 733.2836 | 1 | 131878.3  |             |        |
| 734.2868 | 1 | 52848.45  |             |        |
| 749.2578 | 1 | 276760.53 | C38 H46 O13 | (M+K)+ |
| 750.2609 | 1 | 106024.8  | C38 H46 O13 | (M+K)+ |
| 751.261  | 1 | 45067.43  | C38 H46 O13 | (M+K)+ |
| 922.0098 | 1 | 42019.98  |             |        |

#### Formula Calculator Element Limits

| Element | Min | Max |
|---------|-----|-----|
| C       | 3   | 60  |
| H       | 0   | 120 |
| O       | 0   | 30  |

#### Formula Calculator Results

| Formula     | CalculatedMass | CalculatedMz | Mz       | Diff. (mDa) | Diff. (ppm) | DBE     |
|-------------|----------------|--------------|----------|-------------|-------------|---------|
| C38 H46 O13 | 710.2938       | 749.2570     | 749.2578 | -0.7        | -1.0        | 16.0000 |

Figure S22. <sup>1</sup>H NMR (500 MHz, CDCl<sub>3</sub>) spectrum of compound 4

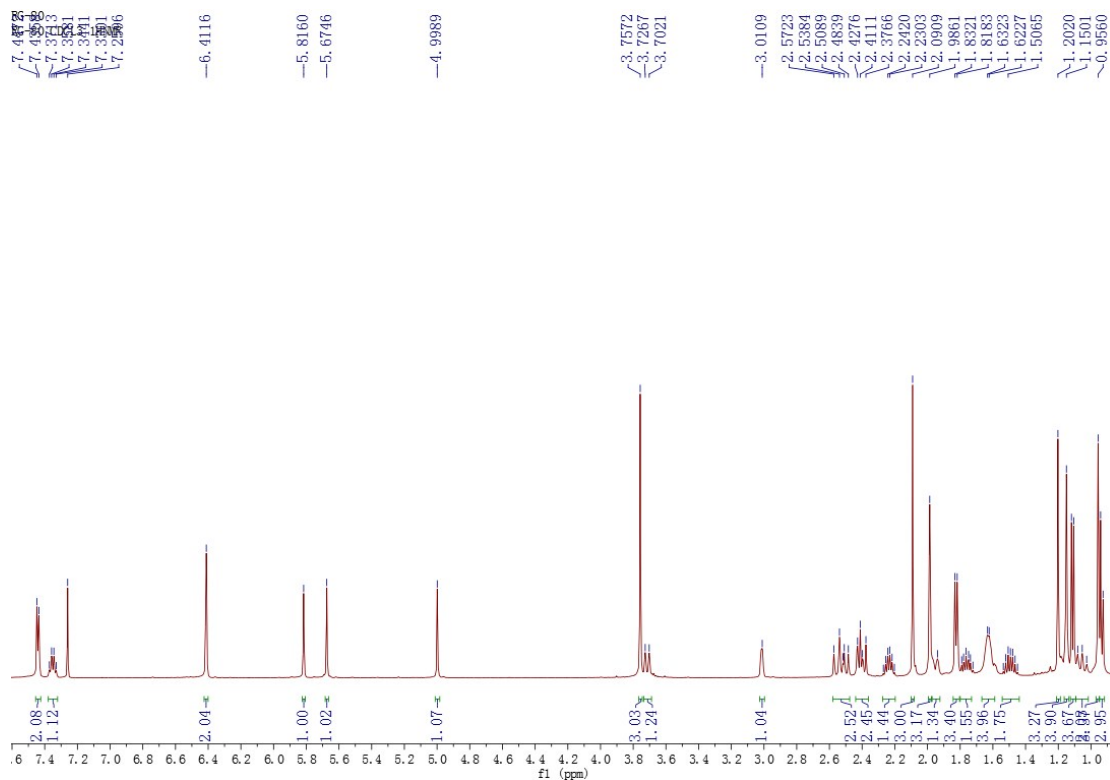

Figure S23. <sup>13</sup>C NMR (125 MHz, CDCl<sub>3</sub>) spectrum of compound 4



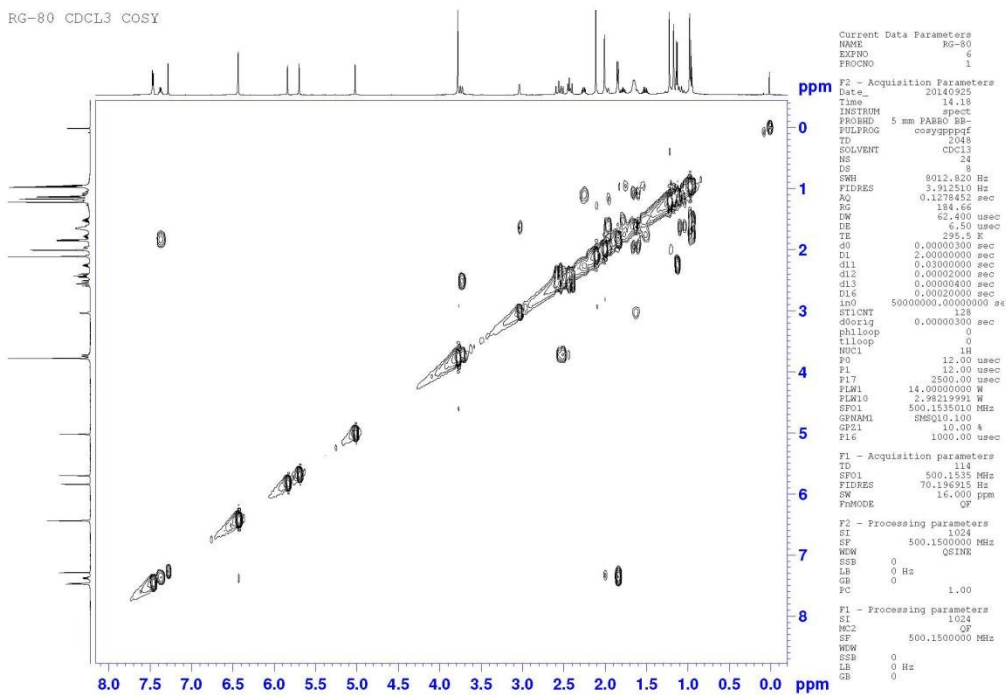

Figure S26. HMBC spectrum of compound 4 in CDCl<sub>3</sub>

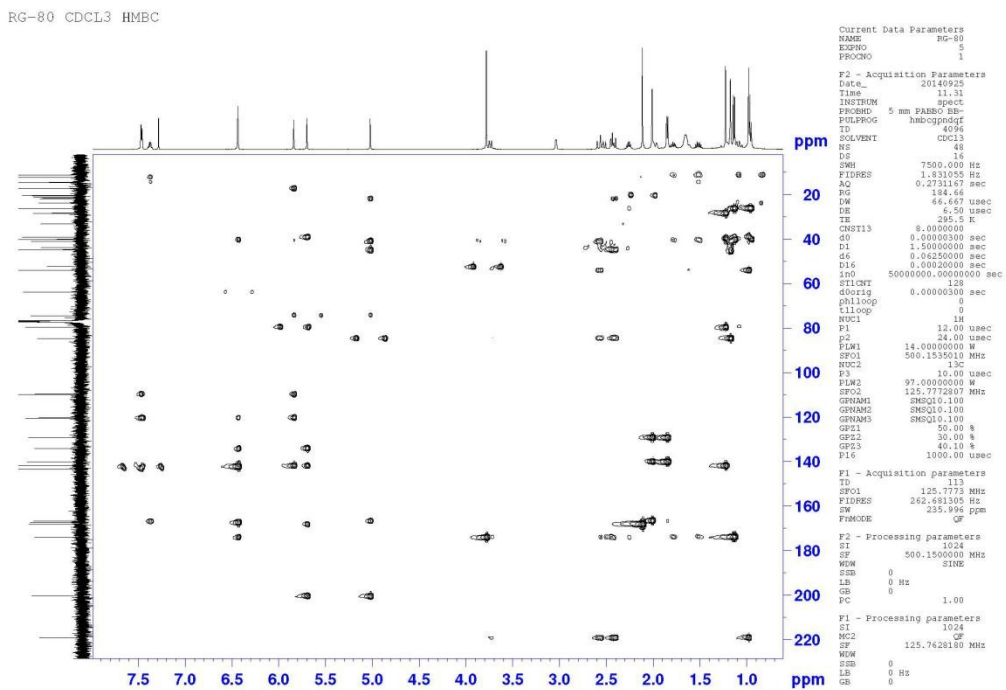

Figure S27. ROESY spectrum of compound 4 in CDCl<sub>3</sub>

RG-80 CDCL3 roesy

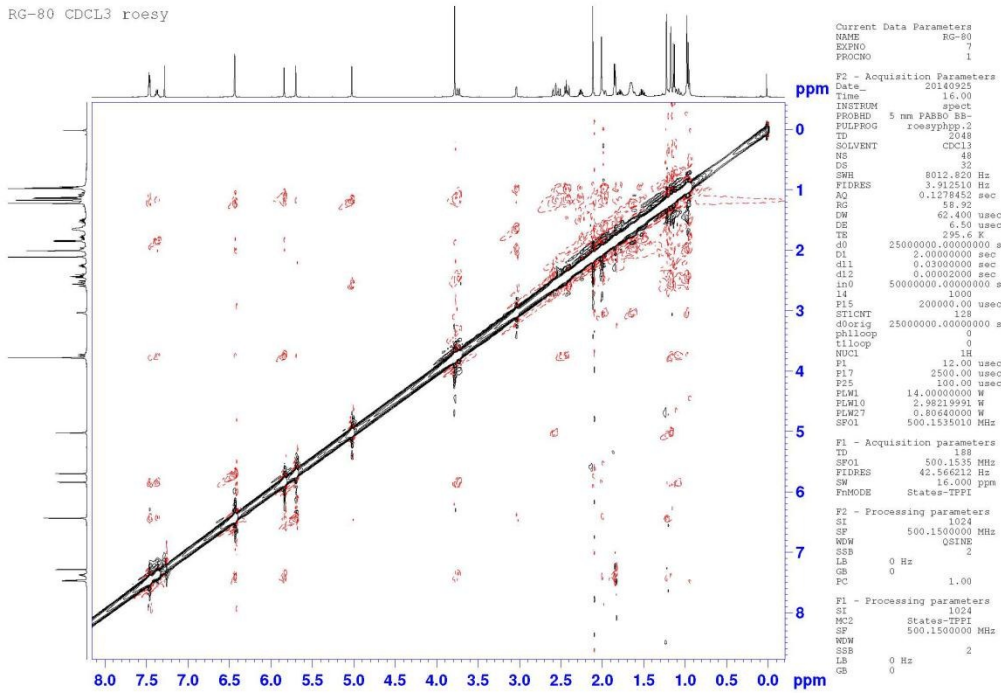

```

Current Data Parameters
NAME      RG-80
EXPNO    7
PROCNO   1

F2 - Acquisition Parameters
Data_    20140925
Time     16.00
INSTRUM  spect
PROBHD   5 mm PABBO BB-
PULPROG  roesypphg.2
TD        2048
SOLVENT  CDCL3
NS        48
DS        32
SWH       8012.820 Hz
FIDRES    3.912510 Hz
AQ        0.1278452 sec
RG         58.92
DM        62.400 usec
DE         6.50 usec
TE        295.6 K
d0        25000000.00000000 s
d1        2.00000000 sec
d11       0.03000000 sec
d12       0.00020000 sec
in0       50000000.00000000 s
I1        1000
P15       2000000.00 usec
STICNT    128
d0org    25000000.00000000 s
ph1loop  0
tilloop  0
NUCL     1H
P1        12.00 usec
P17       2500.00 usec
P25       100.00 usec
PLWL     14.00000000 W
PLW10    2.98219991 W
PLW27    0.80640000 W
SP01     500.1535010 MHz

F1 - Acquisition parameters
TD        128
SP01     500.1535 MHz
FIDRES    42.566212 Hz
SW        16.000 ppm
FhMODE    States-TPPI

F2 - Processing parameters
SI        1024
SF        500.1500000 MHz
WDW       QSINE
SSB       2
LB        0 Hz
GB        0
PC        1.00

F1 - Processing parameters
SI        1024
MC2       States-TPPI
SF        500.1500000 MHz
WDW       +
SSB       2
LB        0 Hz
GB        0
    
```

Figure S28. HRESI-MS spectrum of compound 4

### Qualitative Analysis Report

|                               |                             |                      |                      |
|-------------------------------|-----------------------------|----------------------|----------------------|
| <b>Data Filename</b>          | RG-80.d                     | <b>Sample Name</b>   | RG-80                |
| <b>Sample Type</b>            | Sample                      | <b>Position</b>      | P1-A6                |
| <b>Instrument Name</b>        | Instrument 1                | <b>User Name</b>     |                      |
| <b>Acq Method</b>             | SIBU.m                      | <b>Acquired Time</b> | 8/27/2015 3:07:34 PM |
| <b>IRM Calibration Status</b> | Success                     | <b>DA Method</b>     | Default.m            |
| <b>Comment</b>                |                             |                      |                      |
| <b>Sample Group</b>           |                             | <b>Info.</b>         |                      |
| <b>Acquisition SW</b>         | 6200 series TOF/6500 series |                      |                      |
| <b>Version</b>                | Q-TOF B.05.01 (B5125.2)     |                      |                      |

### User Spectra

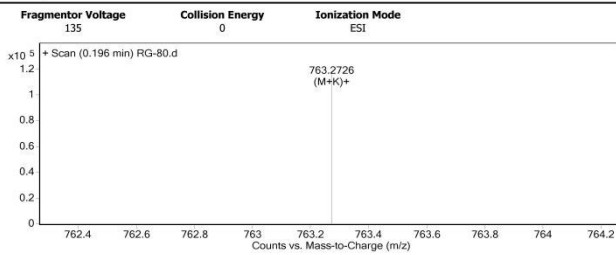

### Peak List

| m/z      | z | Abund     | Formula     | Ion    |
|----------|---|-----------|-------------|--------|
| 121.0509 | 1 | 38475.7   |             |        |
| 742.343  | 1 | 46812.73  |             |        |
| 743.3462 | 1 | 20618.83  |             |        |
| 747.2987 | 1 | 56817.65  |             |        |
| 748.302  | 1 | 22202.19  |             |        |
| 763.2726 | 1 | 117563.34 | C39 H48 O13 | (M+K)+ |
| 764.2755 | 1 | 54507.08  | C39 H48 O13 | (M+K)+ |
| 922.0098 | 1 | 55172.08  |             |        |

### Formula Calculator Element Limits

| Element | Min | Max |
|---------|-----|-----|
| C       | 3   | 60  |
| H       | 0   | 120 |
| O       | 0   | 30  |

### Formula Calculator Results

| Formula     | CalculatedMass | CalculatedMz | Mz       | Diff. (mDa) | Diff. (ppm) | DBE     |
|-------------|----------------|--------------|----------|-------------|-------------|---------|
| C39 H48 O13 | 724.3095       | 763.2726     | 763.2726 | 0.2         | 0.2         | 16.0000 |

Figure S29. <sup>1</sup>H NMR (500 MHz, CDCl<sub>3</sub>) spectrum of compound **5**

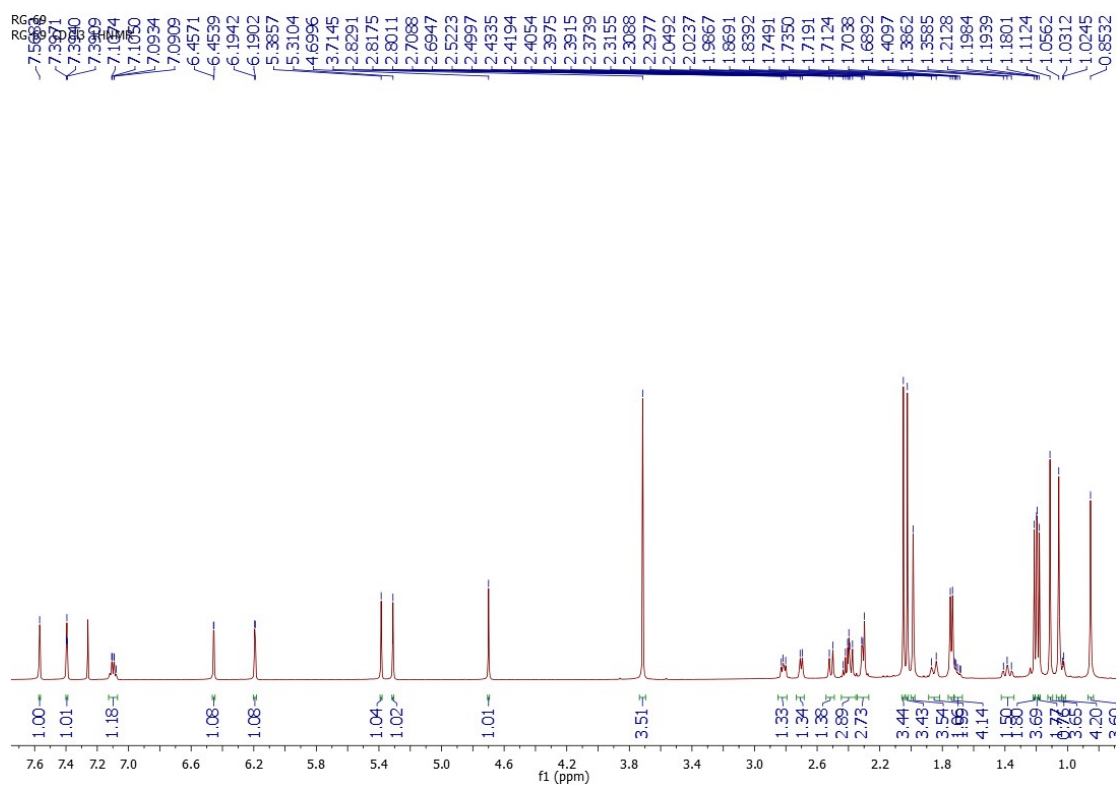

Figure S30. <sup>13</sup>C NMR (125 MHz, CDCl<sub>3</sub>) spectrum of compound **5**

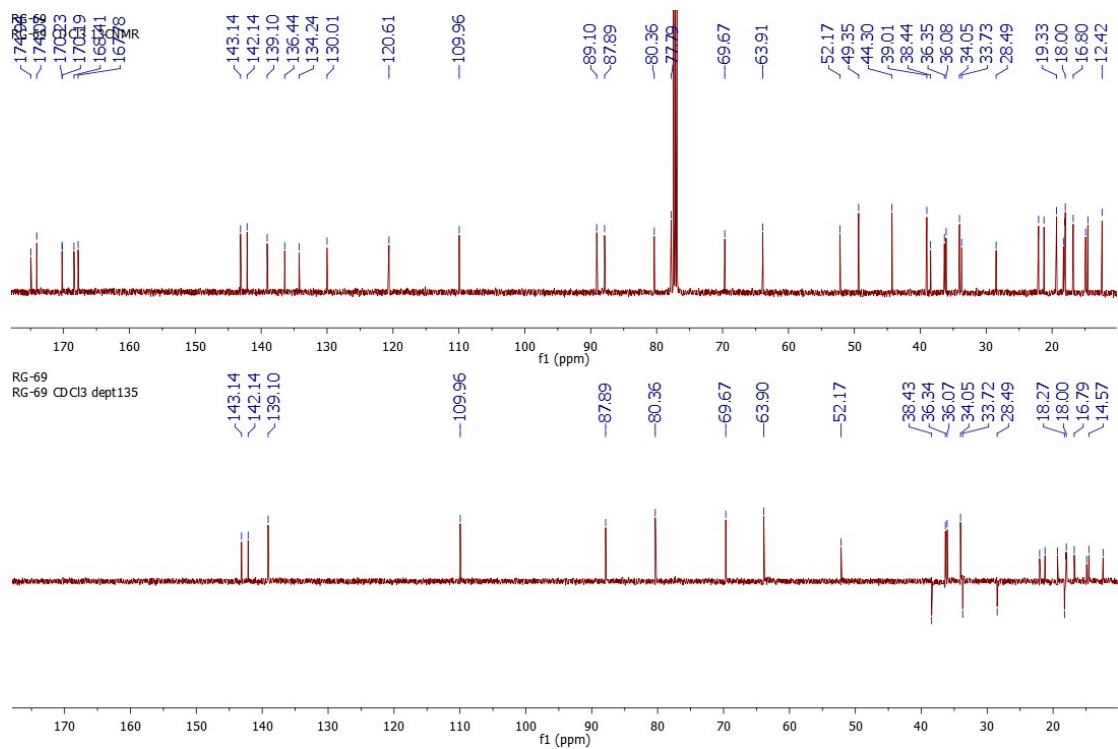

Figure S31. HSQC spectrum of compound **5** in CDCl<sub>3</sub>

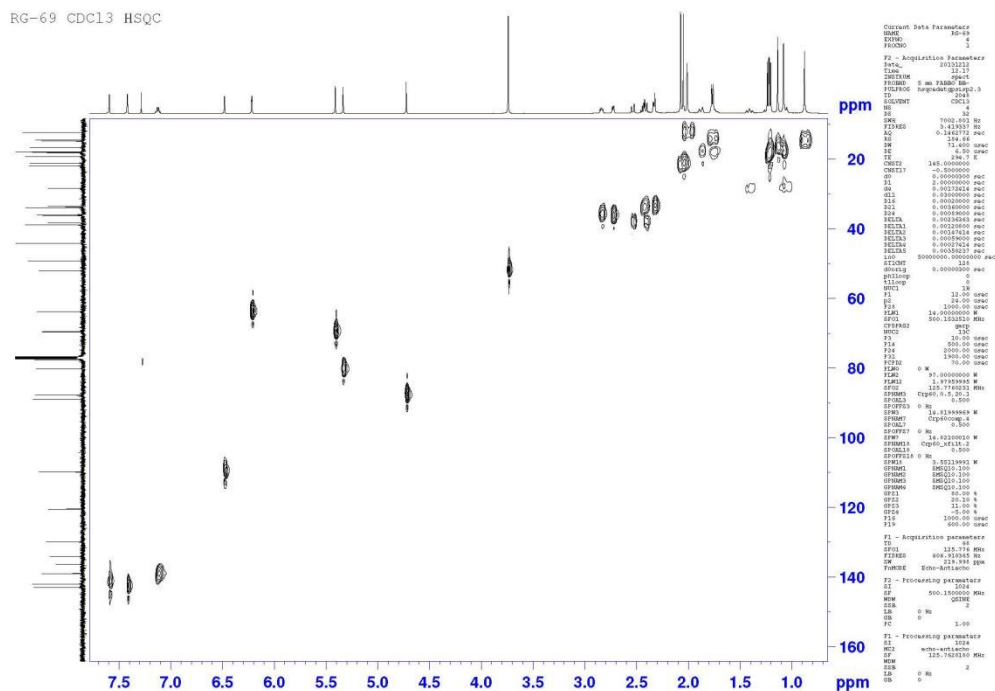

Figure S32. <sup>1</sup>H-<sup>1</sup>H COSY spectrum of compound **5** in CDCl<sub>3</sub>

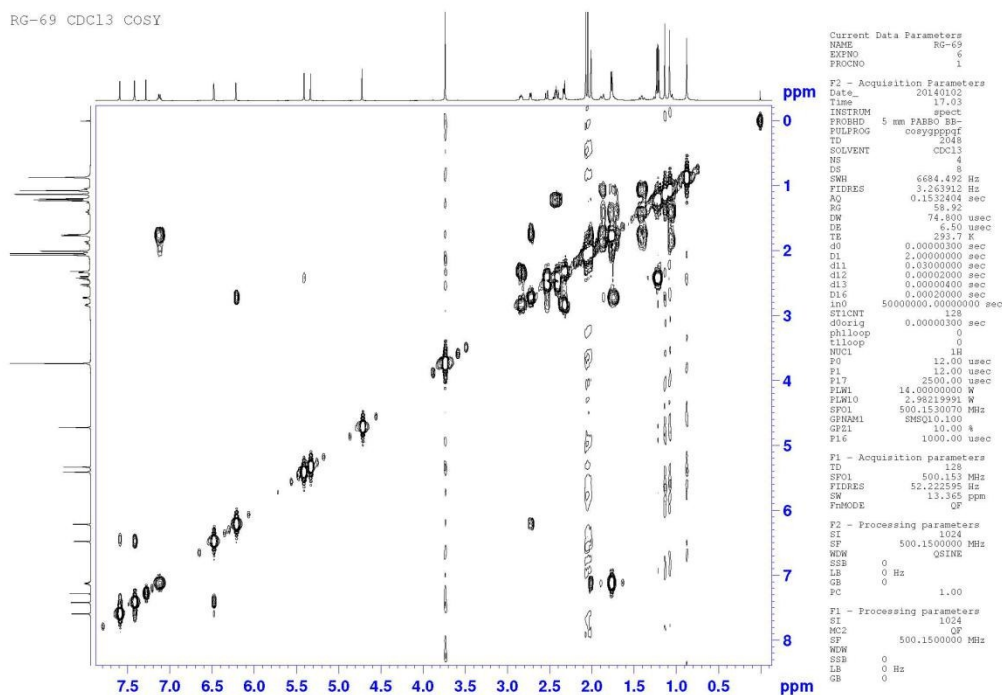

Figure S33. HMBC spectrum of compound **5** in CDCl<sub>3</sub>

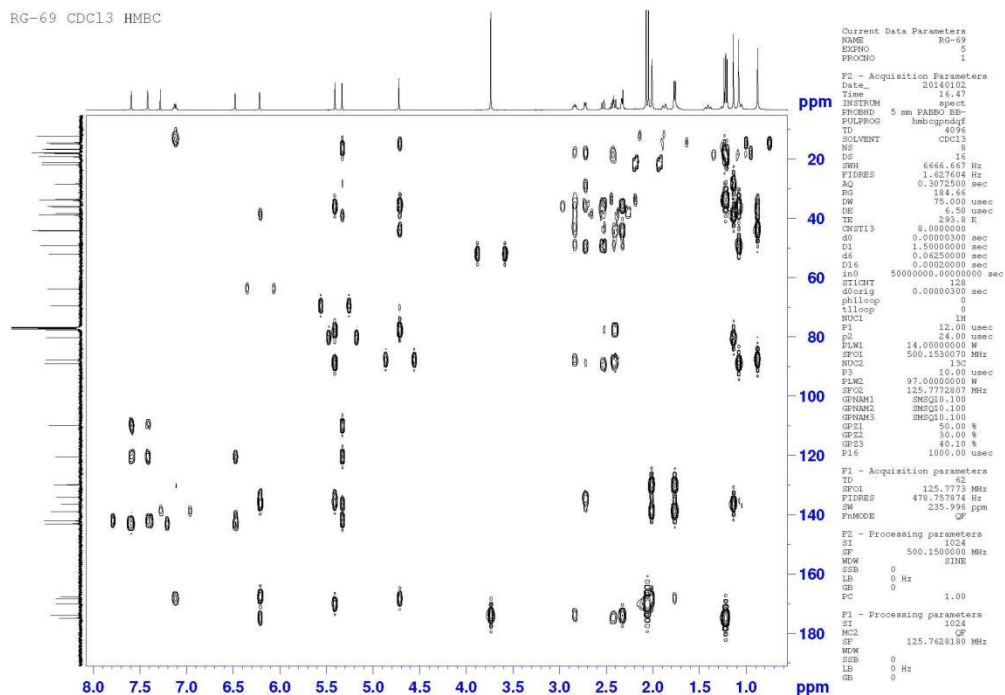

Figure S34. ROESY spectrum of compound **5** in CDCl<sub>3</sub>

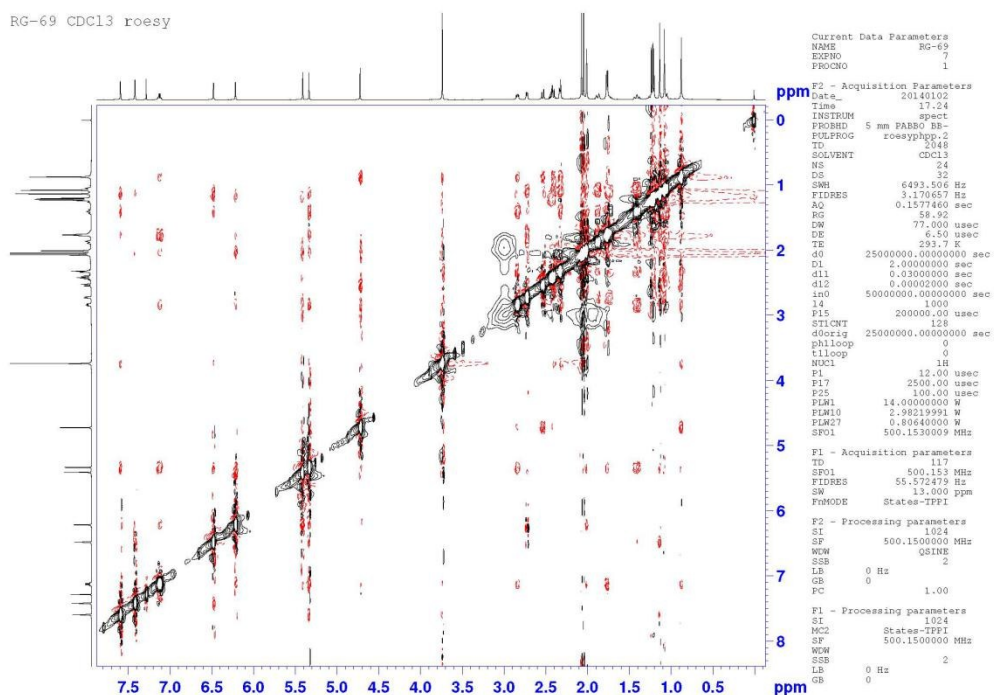

Figure S35. HRESI-MS spectrum of compound 5

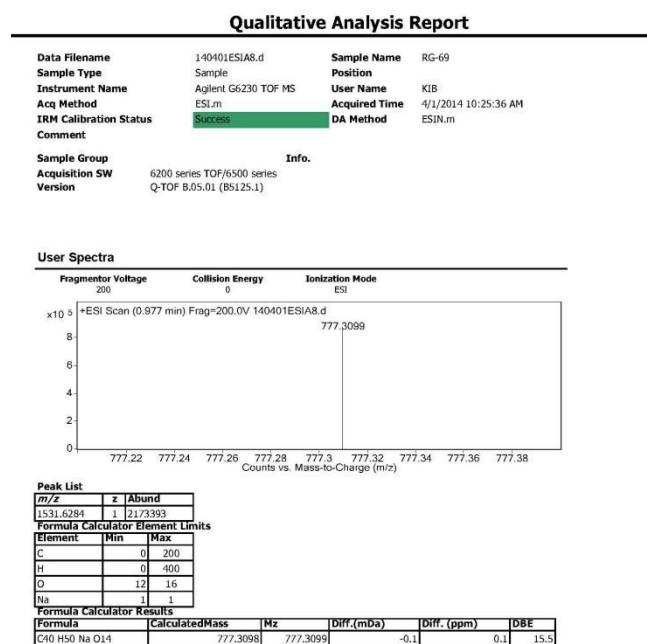

Figure S36. <sup>1</sup>H NMR (500 MHz, CDCl<sub>3</sub>) spectrum of compound 6

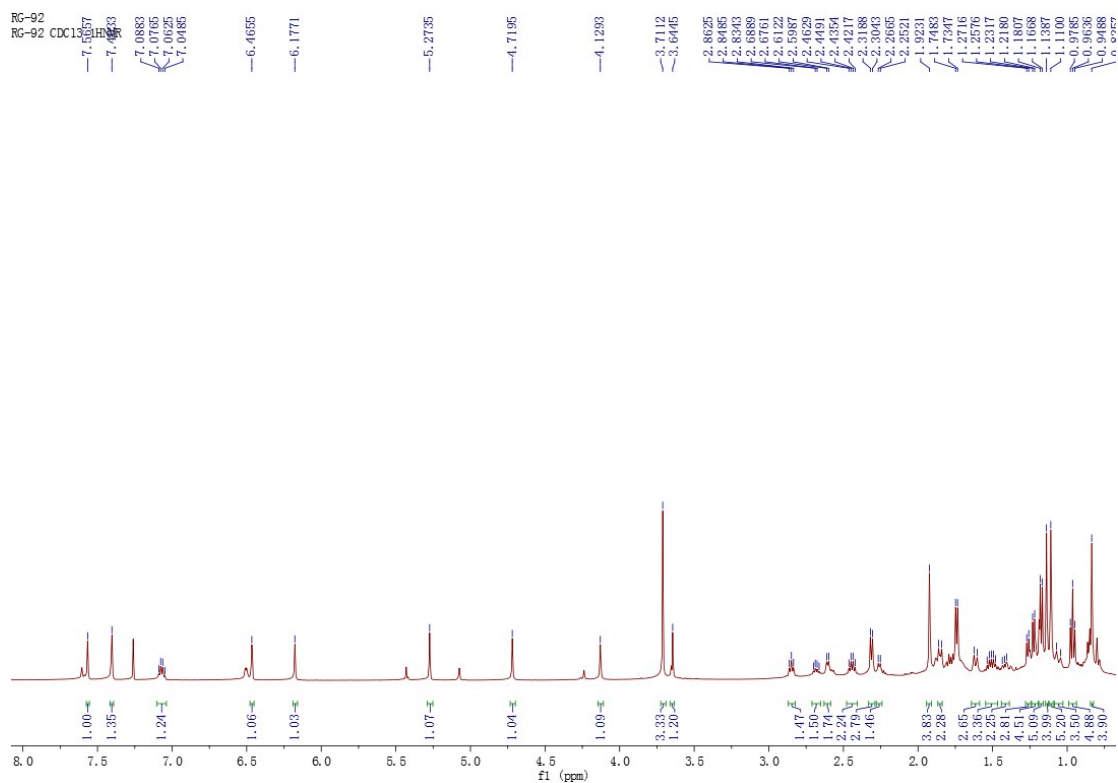

Figure S37. <sup>13</sup>C NMR (125 MHz, CDCl<sub>3</sub>) spectrum of compound 6



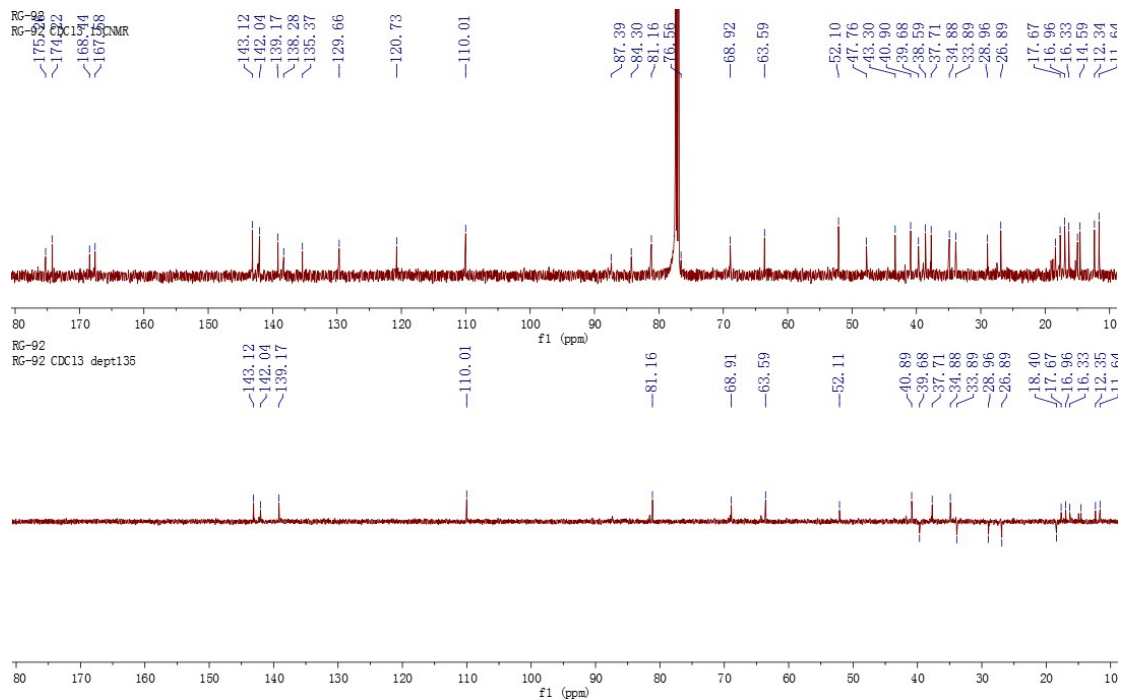

Figure S38. HSQC spectrum of compound **6** in  $\text{CDCl}_3$

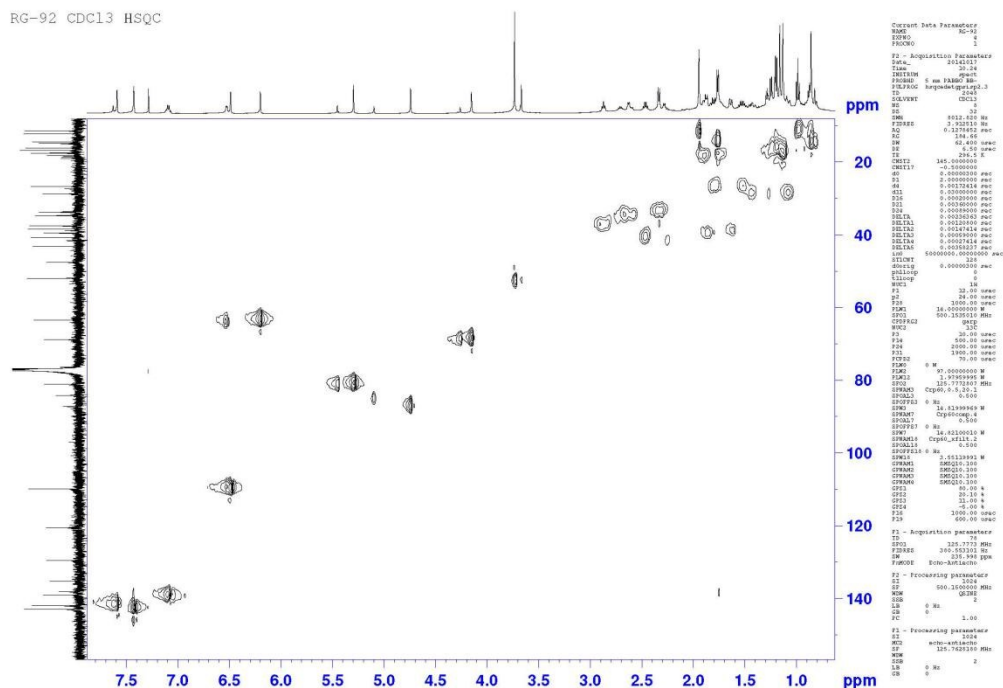

Figure S39.  $^1\text{H}$ - $^1\text{H}$  COSY spectrum of compound **6** in  $\text{CDCl}_3$

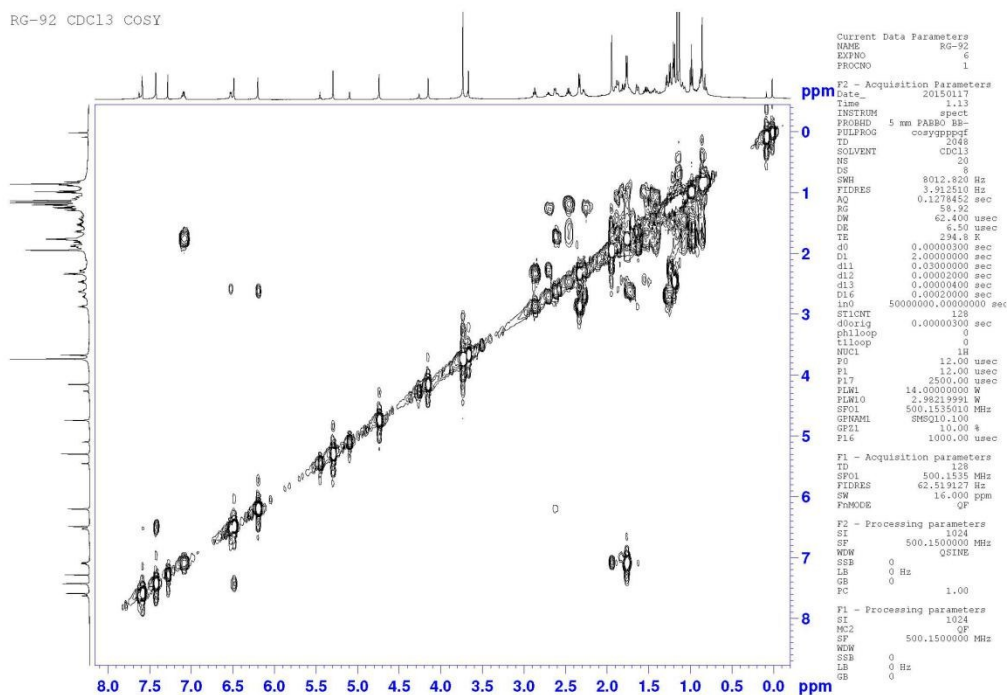

Figure S40. HMBC spectrum of compound **6** in  $\text{CDCl}_3$

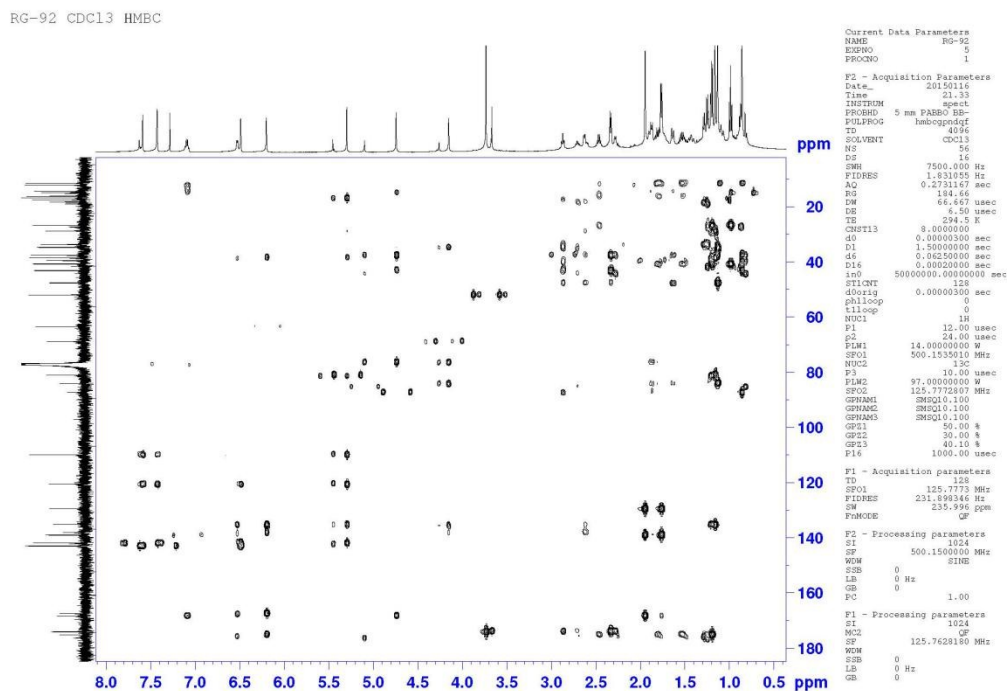

Figure S41. ROESY spectrum of compound 6 in CDCl<sub>3</sub>

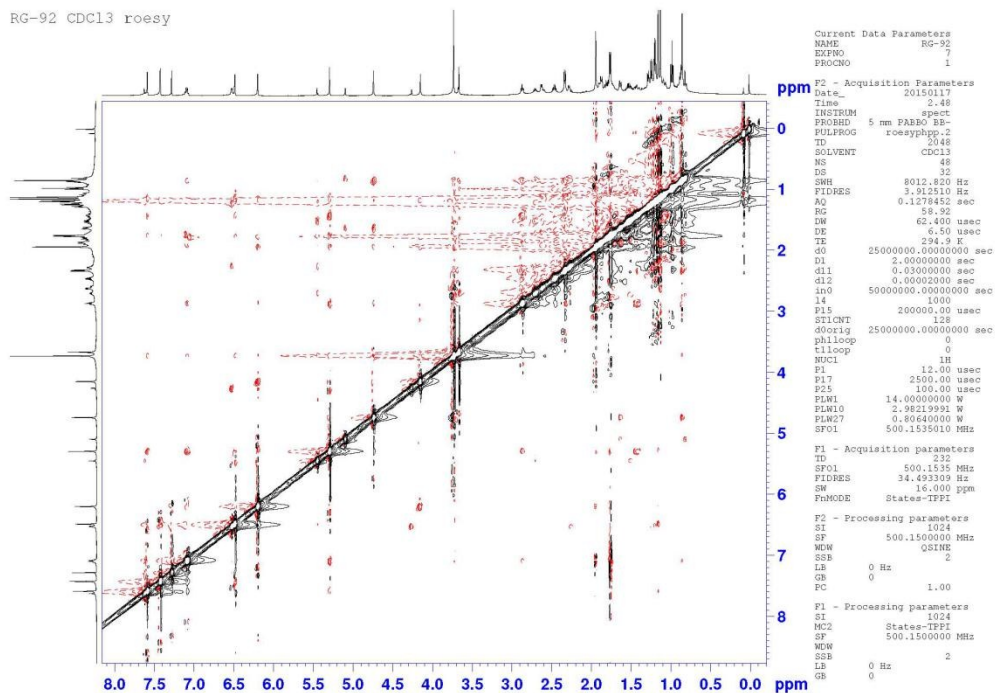

Figure S42. HRESI-MS spectrum of compound 6

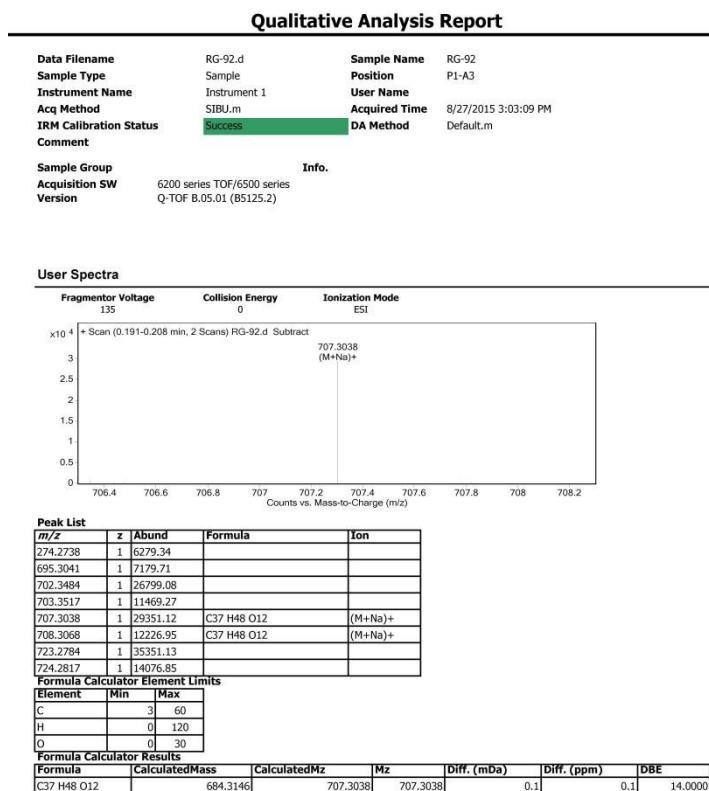

Figure S43.  $^1\text{H}$  NMR (500 MHz,  $\text{CDCl}_3$ ) spectrum of compound 7

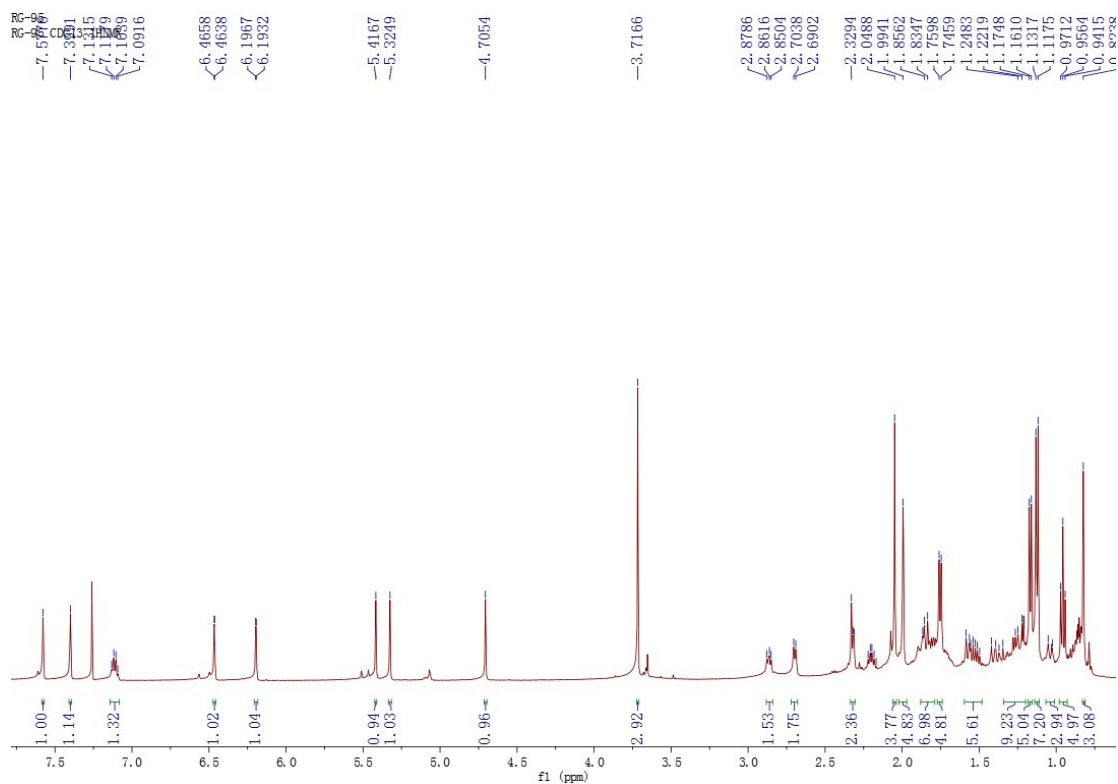

Figure S44.  $^{13}\text{C}$  NMR (125 MHz,  $\text{CDCl}_3$ ) spectrum of compound 7

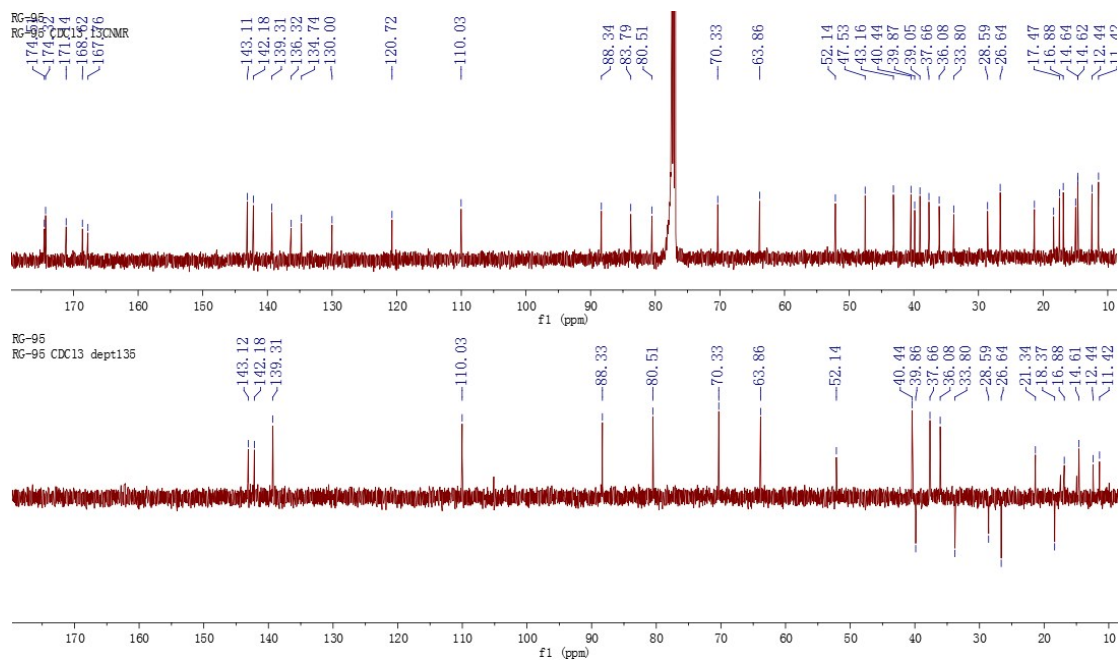



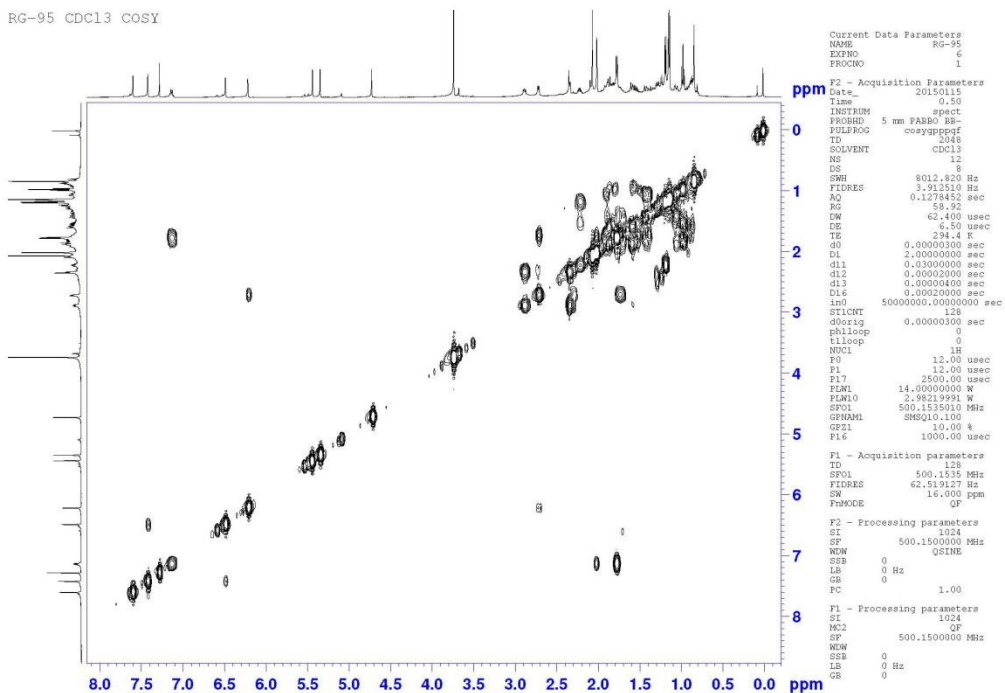

Figure S47. HMBC spectrum of compound 7 in CDCl<sub>3</sub>

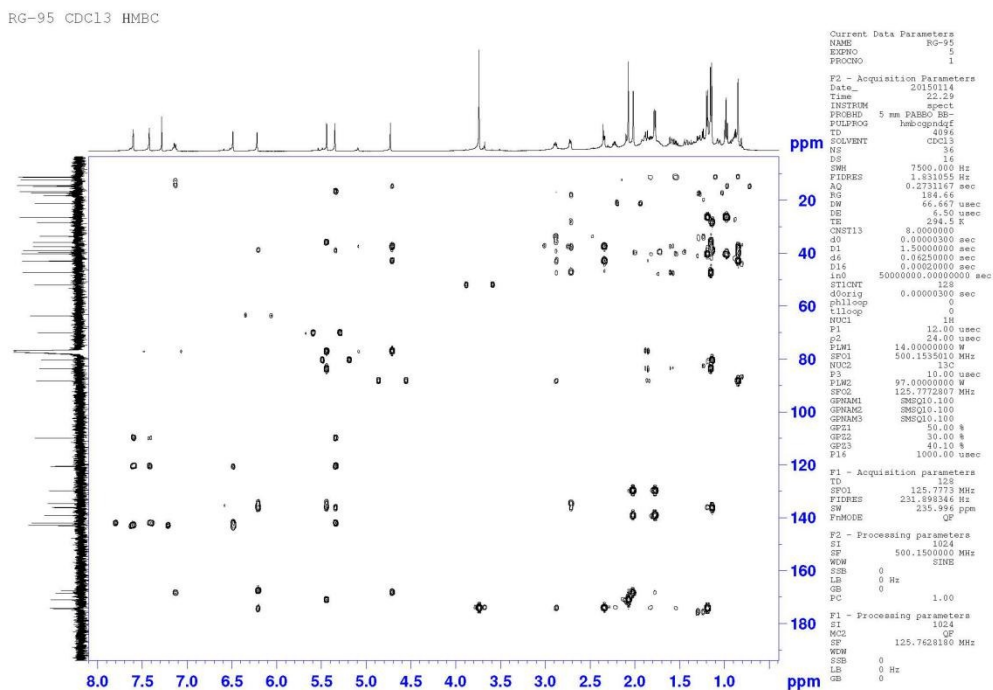

Figure S48. ROESY spectrum of compound 7 in CDCl<sub>3</sub>

RG-95 CDC13 roesy

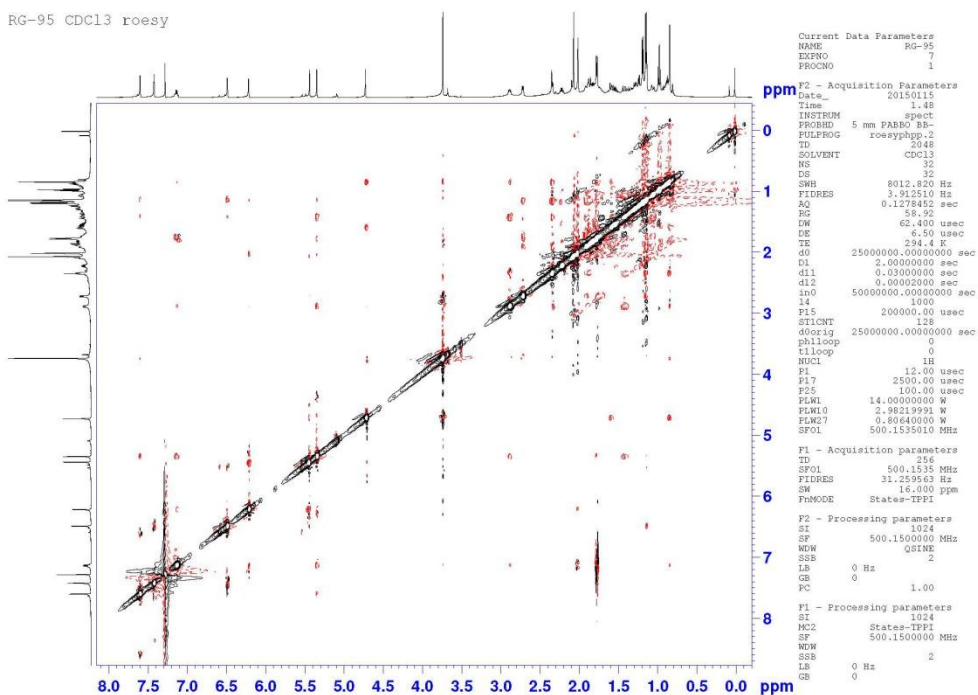

```

Current Data Parameters
NAME      RG-95
EXPERNO   7
PROCNO    1

F2 - Acquisition Parameters
Date_     20150115
Time      1.48
INSTRUM   spect
PROBHD    5 mm PABBO BB-
PULPROG   roesyppg.2
TD         2048
SOLVENT   CDC13
NS         32
DS         32
SMH       8012.820 Hz
FIDRES    3.912510 Hz
AQ         0.1276452 sec
RG         58.92
DW         62.400 usec
DE         6.50 usec
TE         294.4 K
d0         25000000.00000000 sec
d1         2.00000000 sec
d11        0.03000000 sec
d12        0.00002000 sec
in0        50000000.00000000 sec
I4         1500
P15        200000.00 usec
STICNT    128
d0orig    25000000.00000000 sec
p1loop    0
t1loop    0
NUC1      1H
P17        12.00 usec
P17        2500.00 usec
P25        100.00 usec
PLW1       14.00000000 W
PLW10      2.98219291 W
PLW27      0.80640000 W
SFOL       500.1535010 MHz

F1 - Acquisition parameters
TD         256
SFOL       500.1535 MHz
FIDRES    31.253663 Hz
SW         16.900 PPM
PnMODE    States-TPPI

F2 - Processing parameters
SI         1024
SF         500.1500000 MHz
WDW        QSINE
SSB        0
LB         0 Hz
GB         0
PC         1.00

F1 - Processing parameters
SI         1024
MC2        States-TPPI
SF         500.1500000 MHz
WDW        QSINE
SSB        0
LB         0 Hz
GB         0
    
```

Figure S49. HRESI-MS spectrum of compound 7

### Qualitative Analysis Report

|                               |                             |                      |                      |
|-------------------------------|-----------------------------|----------------------|----------------------|
| <b>Data Filename</b>          | RG-95.d                     | <b>Sample Name</b>   | RG-95                |
| <b>Sample Type</b>            | Sample                      | <b>Position</b>      | P1-B2                |
| <b>Instrument Name</b>        | Instrument 1                | <b>User Name</b>     |                      |
| <b>Acq Method</b>             | SIBU.m                      | <b>Acquired Time</b> | 8/27/2015 3:14:54 PM |
| <b>IRM Calibration Status</b> | Success                     | <b>DA Method</b>     | Default.m            |
| <b>Comment</b>                |                             |                      |                      |
| <b>Sample Group</b>           |                             | <b>Info.</b>         |                      |
| <b>Acquisition SW</b>         | 6200 series TOF/6500 series |                      |                      |
| <b>Version</b>                | Q-TOF B.05.01 (B5125.2)     |                      |                      |

### User Spectra

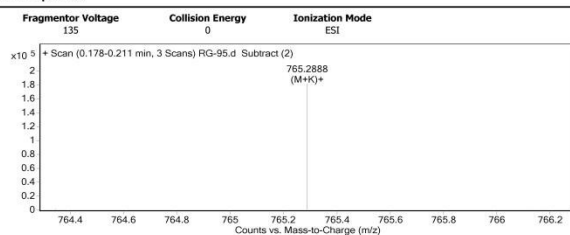

### Peak List

| m/z      | z | Abund     | Formula     | Ion    |
|----------|---|-----------|-------------|--------|
| 744.3593 | 1 | 105860.16 |             |        |
| 745.3624 | 1 | 43446.01  |             |        |
| 749.3148 | 1 | 88989.13  |             |        |
| 750.318  | 1 | 35364.75  |             |        |
| 765.2888 | 1 | 181052.48 | C39 H50 O13 | (M+K)+ |
| 766.2921 | 1 | 77883.64  | C39 H50 O13 | (M+K)+ |
| 767.2918 | 1 | 30469.57  | C39 H50 O13 | (M+K)+ |
| 772.3905 | 1 | 17044.38  |             |        |

### Formula Calculator Element Limits

| Element | Min | Max |
|---------|-----|-----|
| C       | 3   | 60  |
| H       | 0   | 120 |
| O       | 0   | 30  |

### Formula Calculator Results

| Formula     | CalculatedMass | CalculatedMz | Mz       | Diff. (mDa) | Diff. (ppm) | DBE     |
|-------------|----------------|--------------|----------|-------------|-------------|---------|
| C39 H50 O13 | 726.3251       | 765.2883     | 765.2888 | -0.5        | -0.6        | 15.0000 |

--- End Of Report ---

Figure S50. <sup>1</sup>H NMR (500 MHz, CDCl<sub>3</sub>) spectrum of compound 9

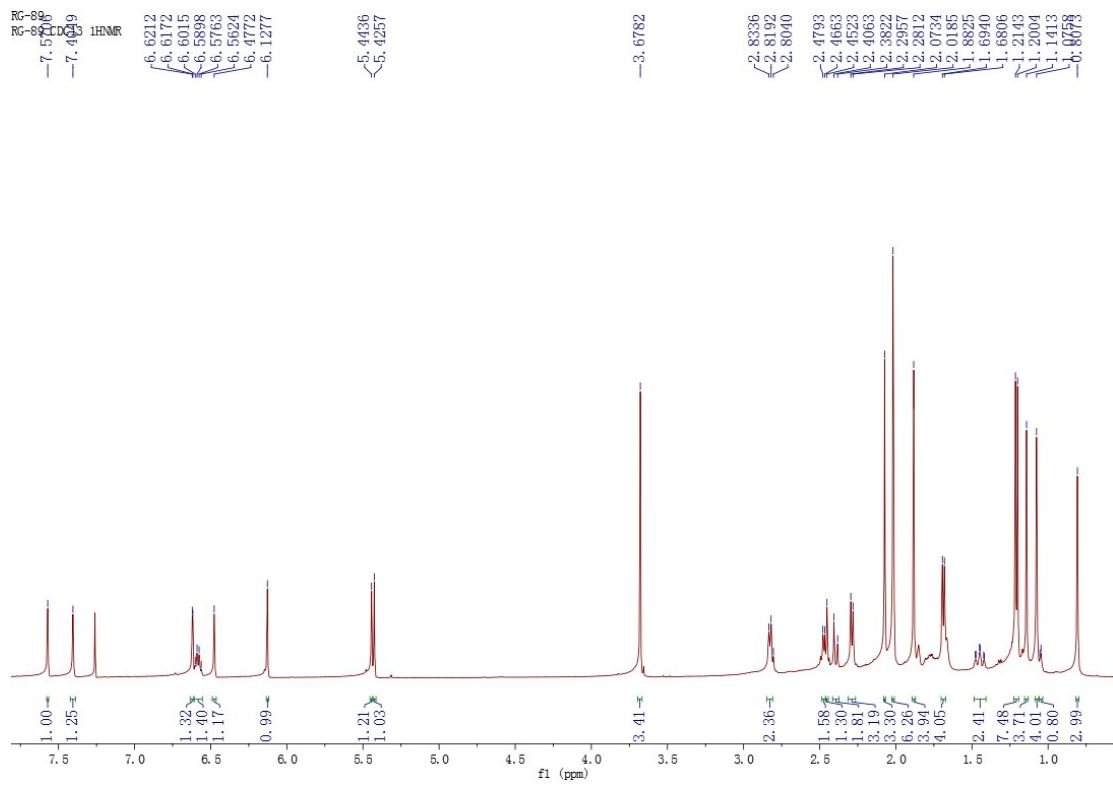

Figure S51. <sup>13</sup>C NMR (125 MHz, CDCl<sub>3</sub>) spectrum of compound **9**

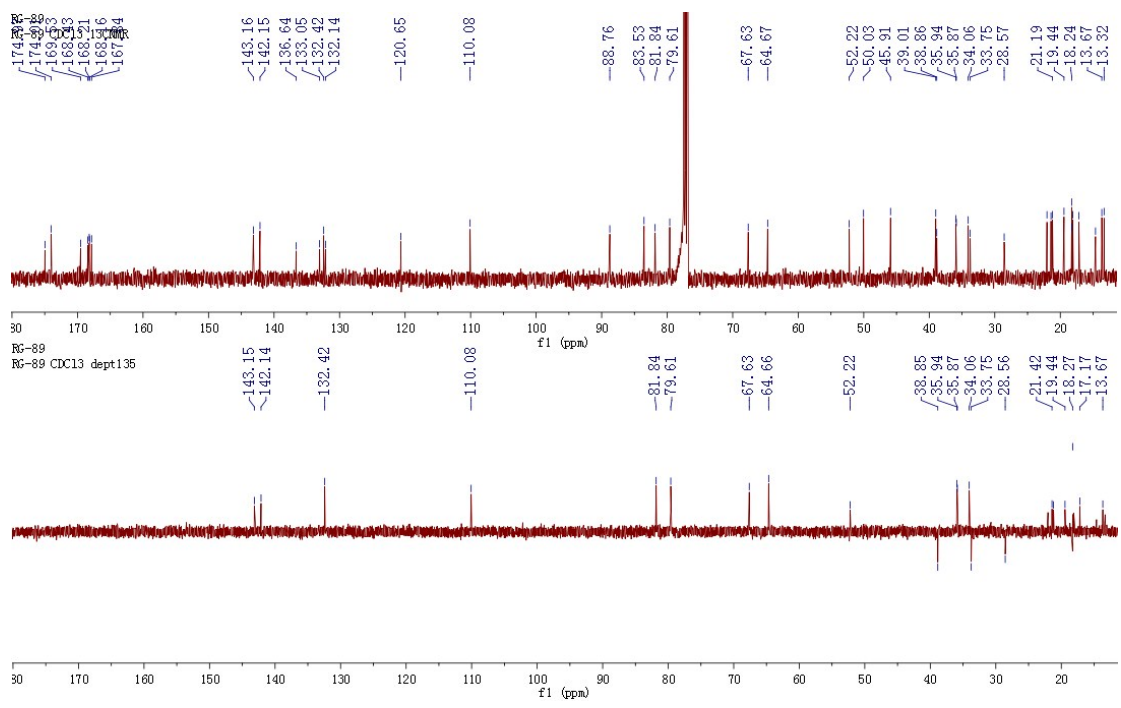



Figure S52. HSQC spectrum of compound **9** in CDCl<sub>3</sub>

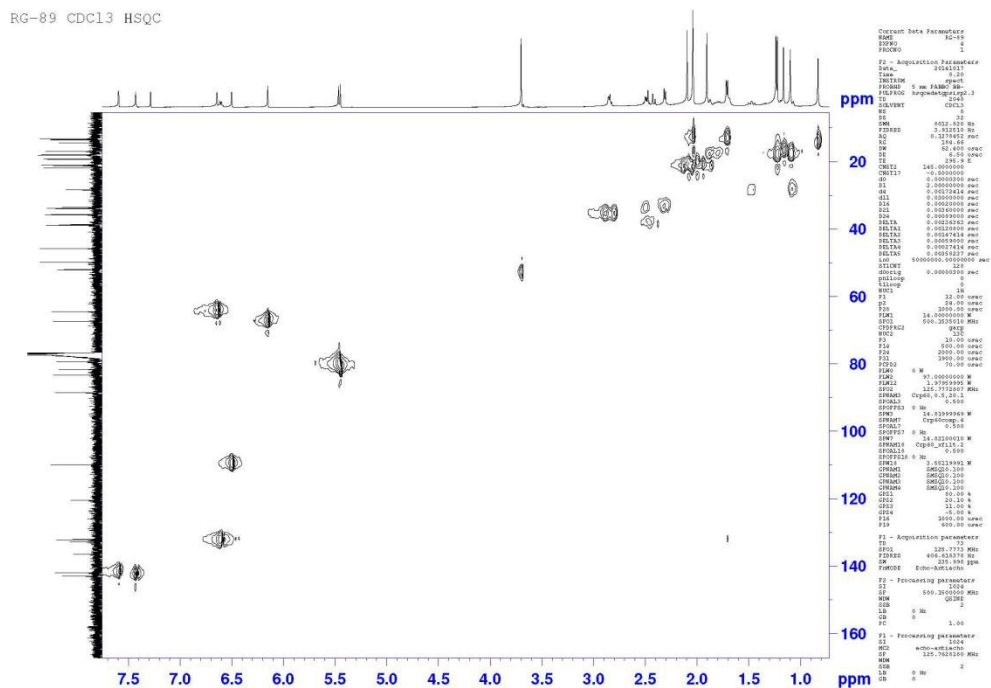

Figure S53. <sup>1</sup>H-<sup>1</sup>H COSY spectrum of compound **9** in CDCl<sub>3</sub>

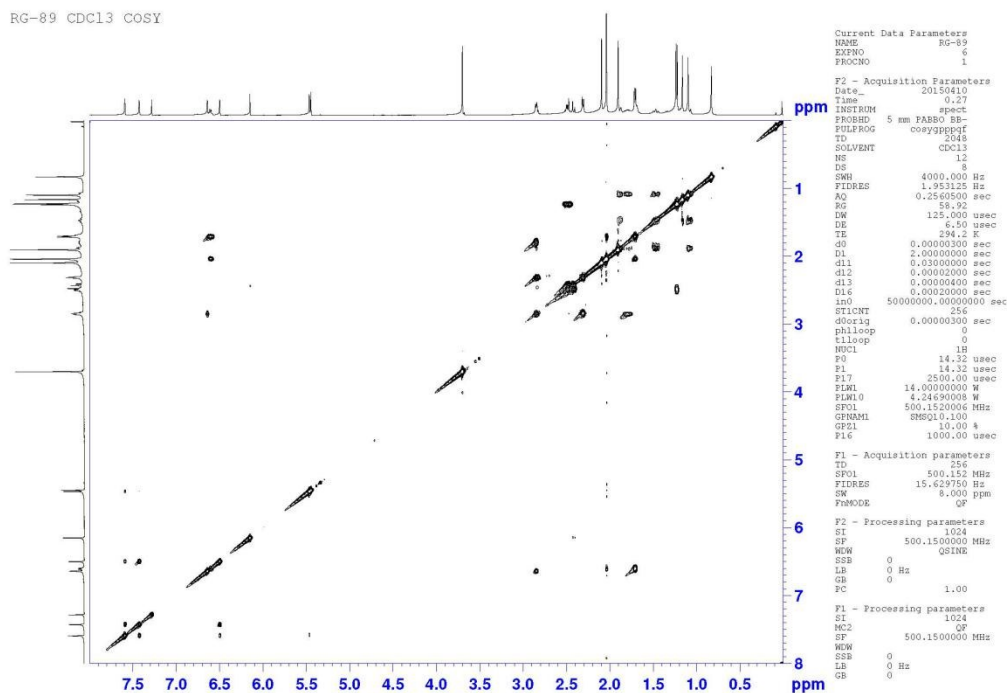

Figure S54. HMBC spectrum of compound **9** in CDCl<sub>3</sub>

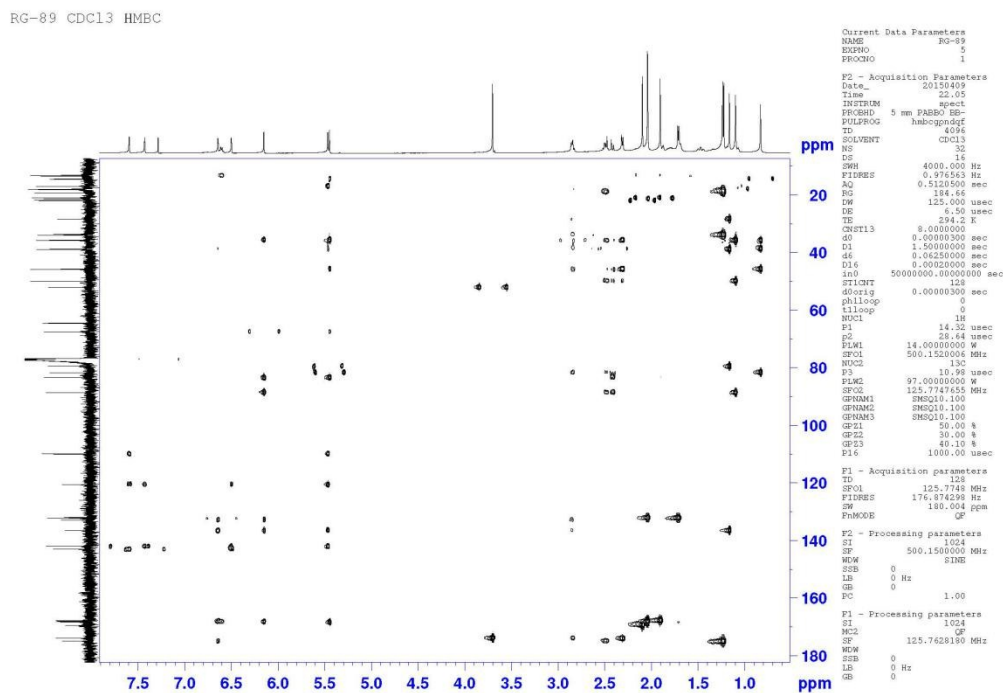

Figure S55. ROESY spectrum of compound **9** in CDCl<sub>3</sub>

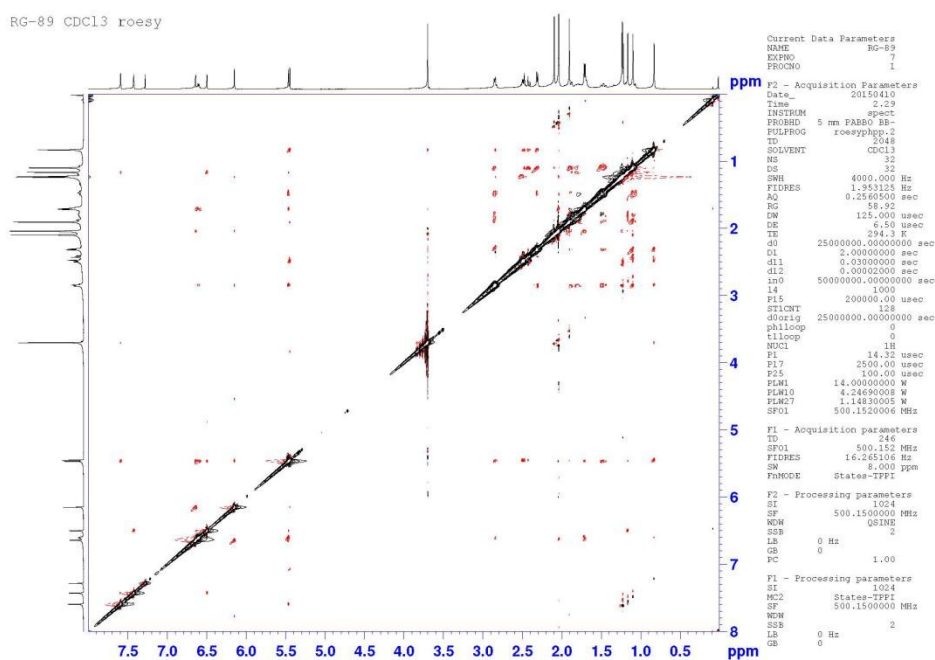

Figure S56. HRESI-MS spectrum of compound **9**

## Qualitative Analysis Report

|                        |              |               |                      |
|------------------------|--------------|---------------|----------------------|
| Data Filename          | RG-89.d      | Sample Name   | RG-89                |
| Sample Type            | Sample       | Position      | P1-A8                |
| Instrument Name        | Instrument 1 | User Name     |                      |
| Acq Method             | SIBU.m       | Acquired Time | 8/27/2015 3:10:31 PM |
| IRM Calibration Status | Success      | DA Method     | Default.m            |

Sample Group: Info.  
 Acquisition SW: 6200 series TOF/6500 series  
 Version: Q-TOF B.05.01 (B5125.2)

### User Spectra

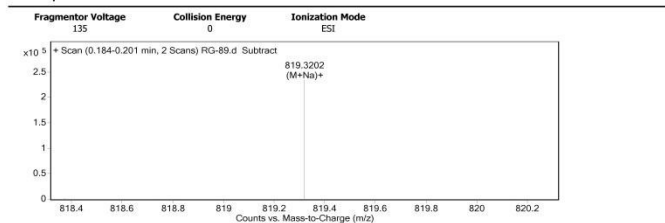

### Peak List

| m/z      | z | Abund     | Formula     | Ion     |
|----------|---|-----------|-------------|---------|
| 814.365  | 1 | 145966.16 |             |         |
| 815.3679 | 1 | 63599.23  |             |         |
| 819.3202 | 1 | 234960.58 | C42 H52 O15 | (M+Na)+ |
| 820.3235 | 1 | 105680.58 | C42 H52 O15 | (M+Na)+ |
| 821.3261 | 1 | 29166.88  | C42 H52 O15 | (M+Na)+ |
| 835.2941 | 1 | 199694.77 |             |         |
| 836.2974 | 1 | 92325.59  |             |         |
| 837.2975 | 1 | 37021.72  |             |         |

### Formula Calculator Element Limits

| Element | Min | Max |
|---------|-----|-----|
| C       | 3   | 60  |
| H       | 0   | 120 |
| O       | 0   | 30  |

### Formula Calculator Results

| Formula     | CalculatedMass | CalculatedMz | Mz       | Diff. (mDa) | Diff. (ppm) | DBE     |
|-------------|----------------|--------------|----------|-------------|-------------|---------|
| C42 H52 O15 | 796.3306       | 819.3198     | 819.3202 | -0.3        | -0.4        | 17.0000 |

Figure S57. <sup>1</sup>H NMR (500 MHz, CDCl<sub>3</sub>) spectrum of compound **10**

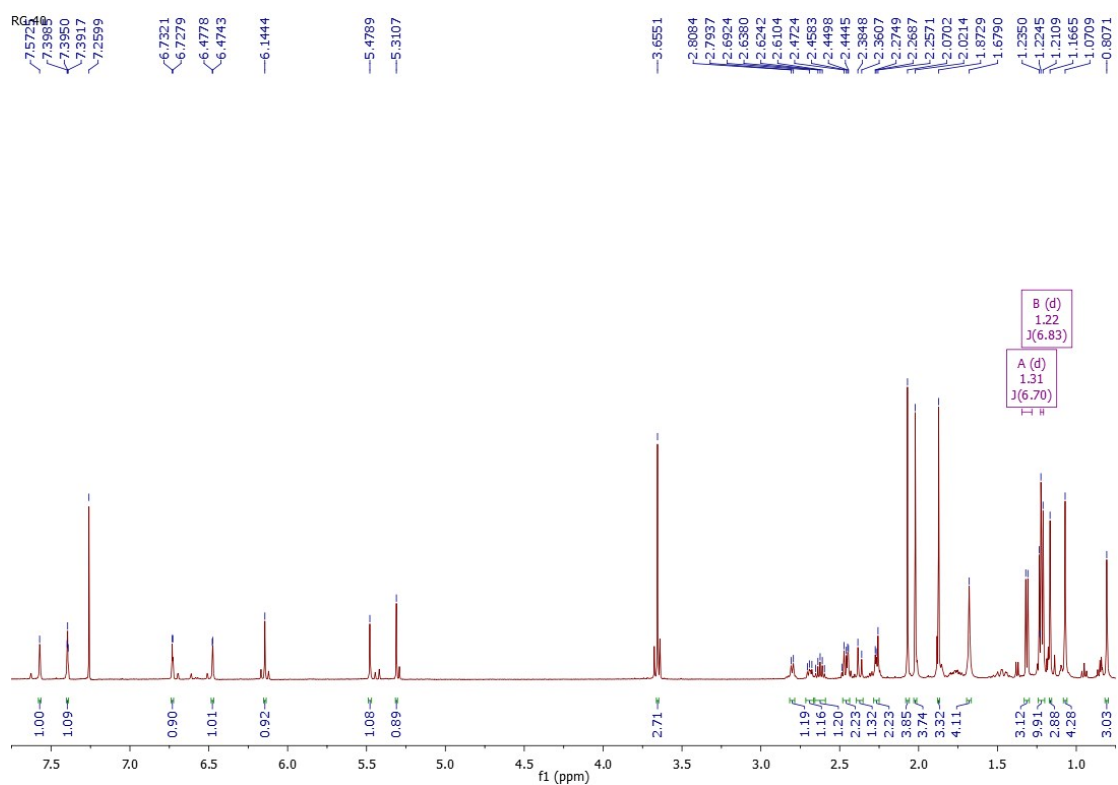

Figure S58. <sup>13</sup>C NMR (125 MHz, CDCl<sub>3</sub>) spectrum of compound **10**

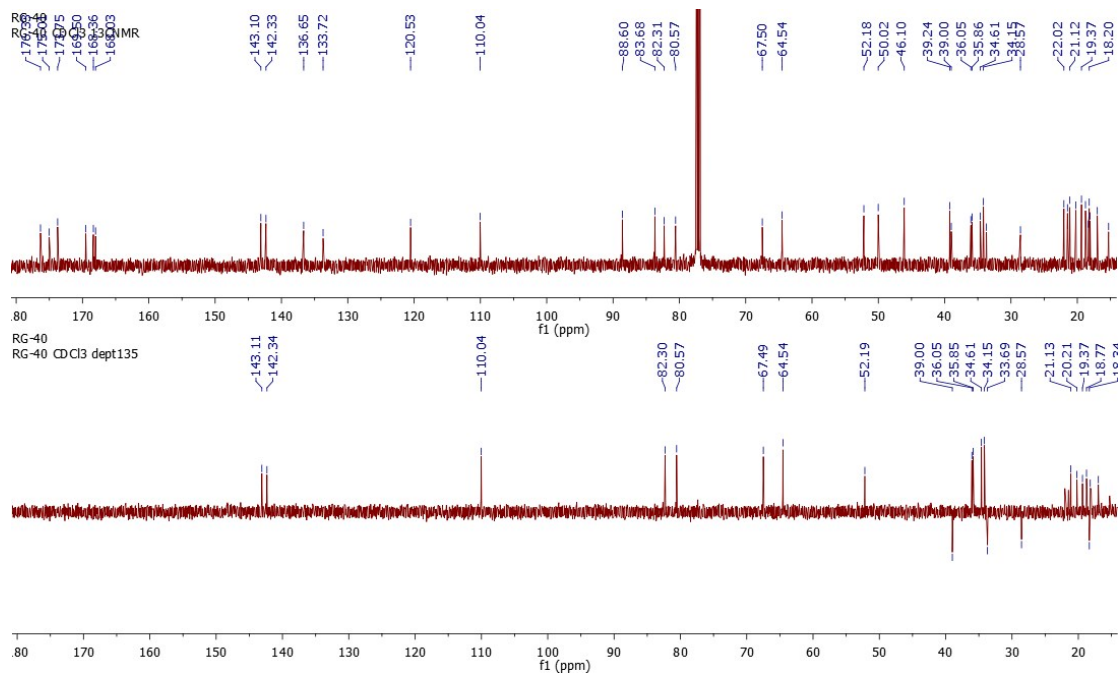

Figure S59. HSQC spectrum of compound **10** in  $CDCl_3$

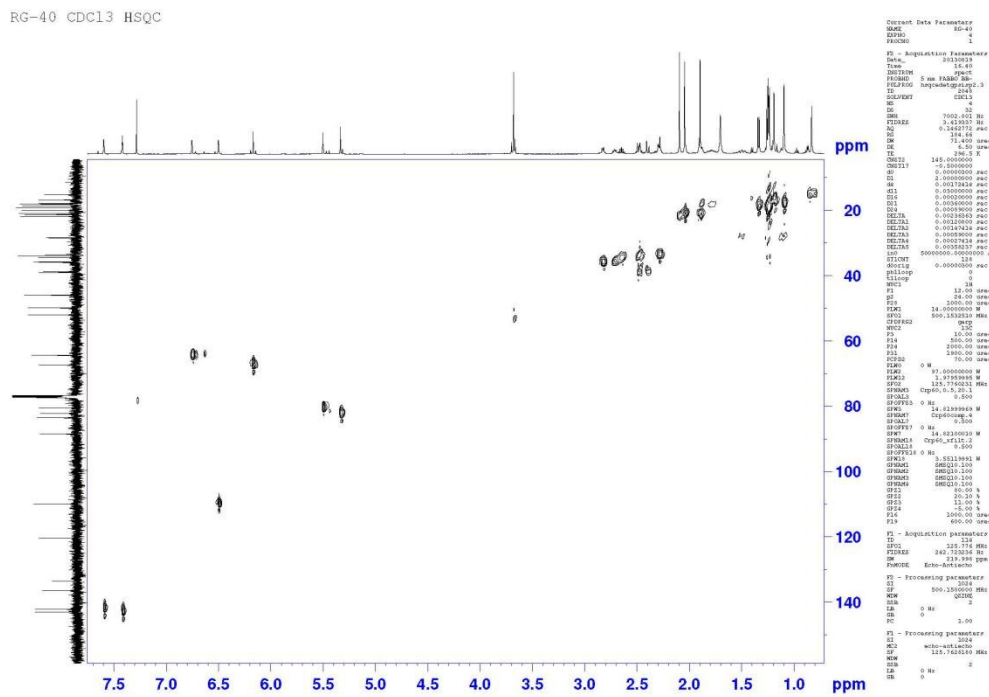

Figure S60.  $^1H$ - $^1H$  COSY spectrum of compound **10** in  $CDCl_3$

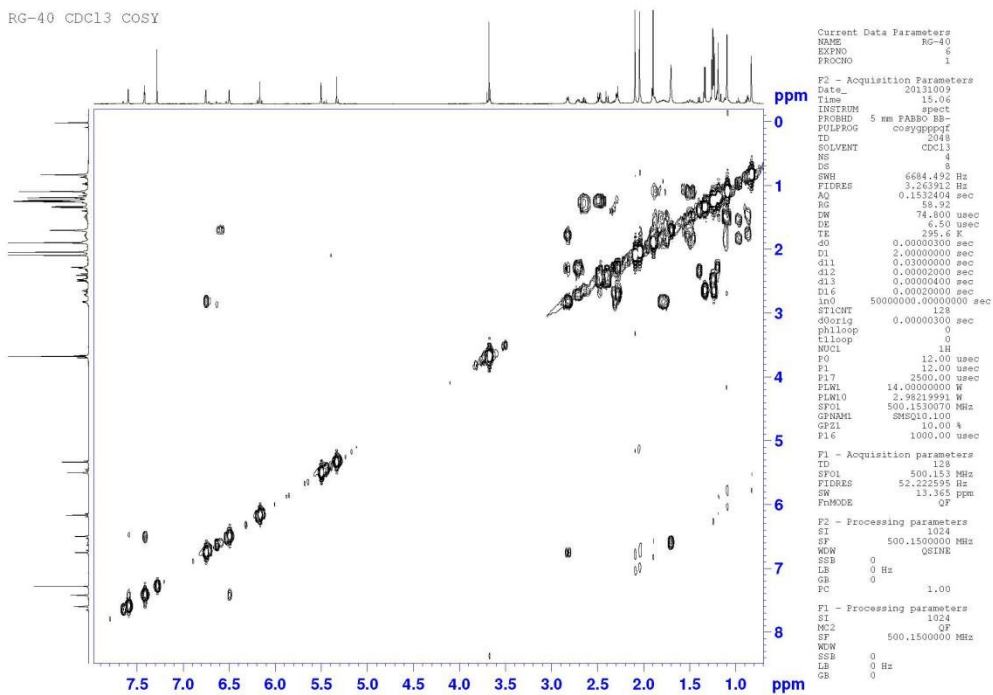

Figure S61. HMBC spectrum of compound **10** in CDCl<sub>3</sub>

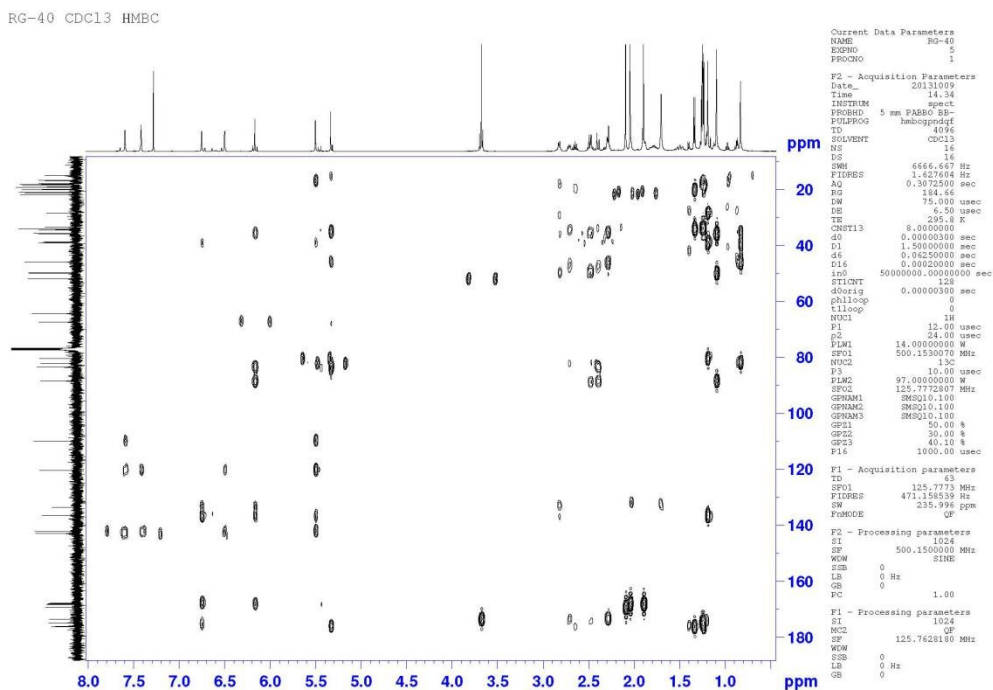

Figure S62. ROESY spectrum of compound **10** in CDCl<sub>3</sub>

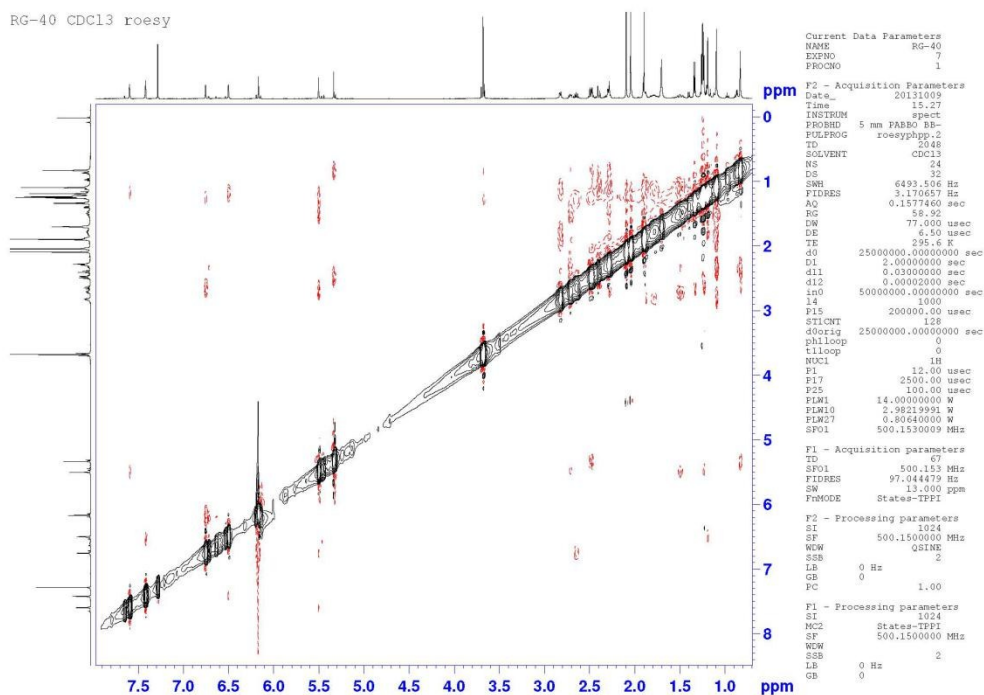

Figure S63. HRESI-MS spectrum of compound 10

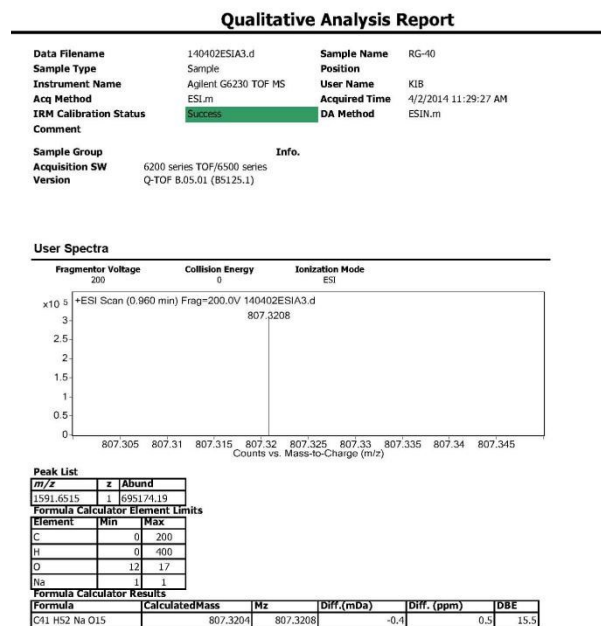

Figure S64. <sup>1</sup>H NMR (500 MHz, CDCl<sub>3</sub>) spectrum of compound 11

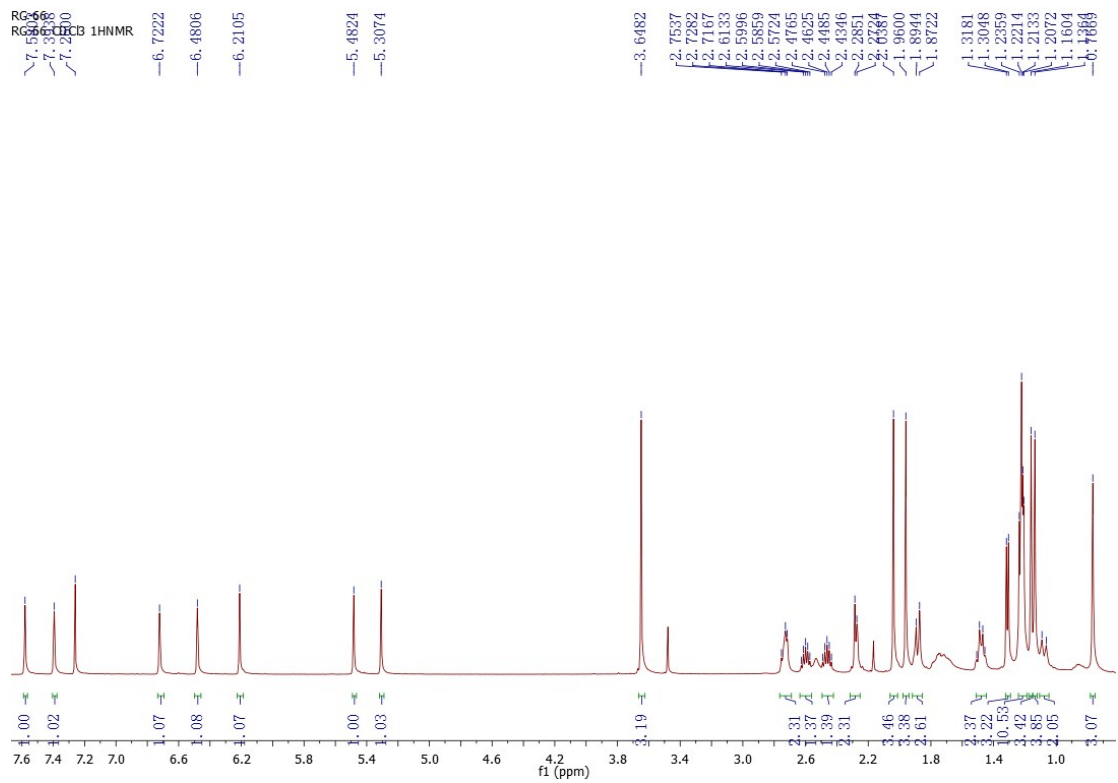

Figure S65. <sup>13</sup>C NMR (125 MHz, CDCl<sub>3</sub>) spectrum of compound **11**

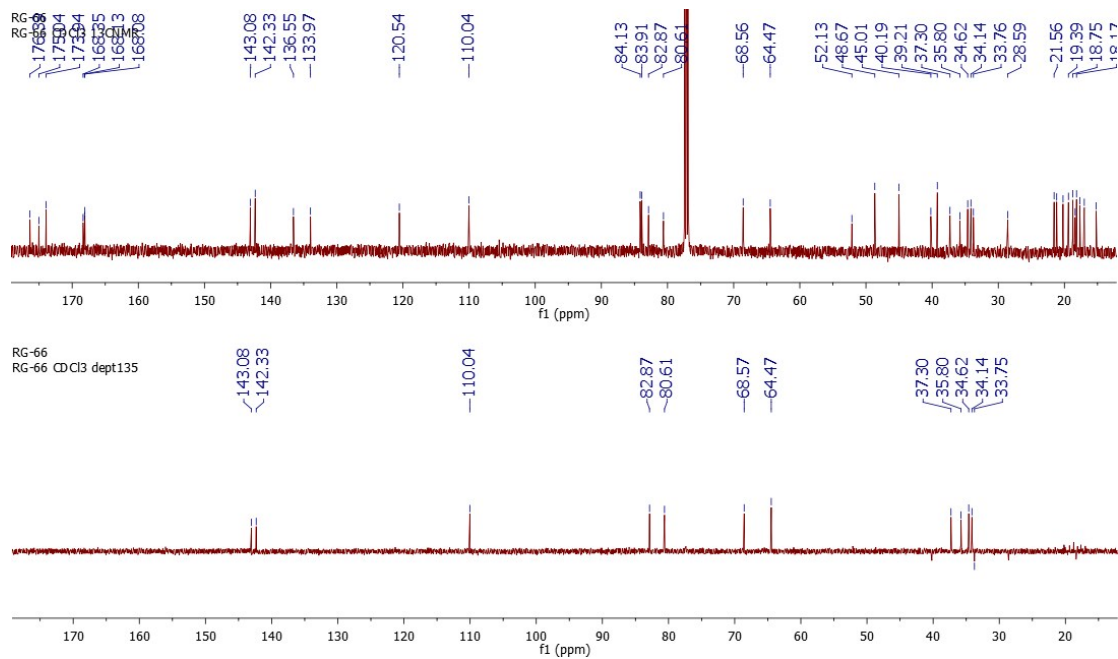

Figure S66. HSQC spectrum of compound **11** in CDCl<sub>3</sub>

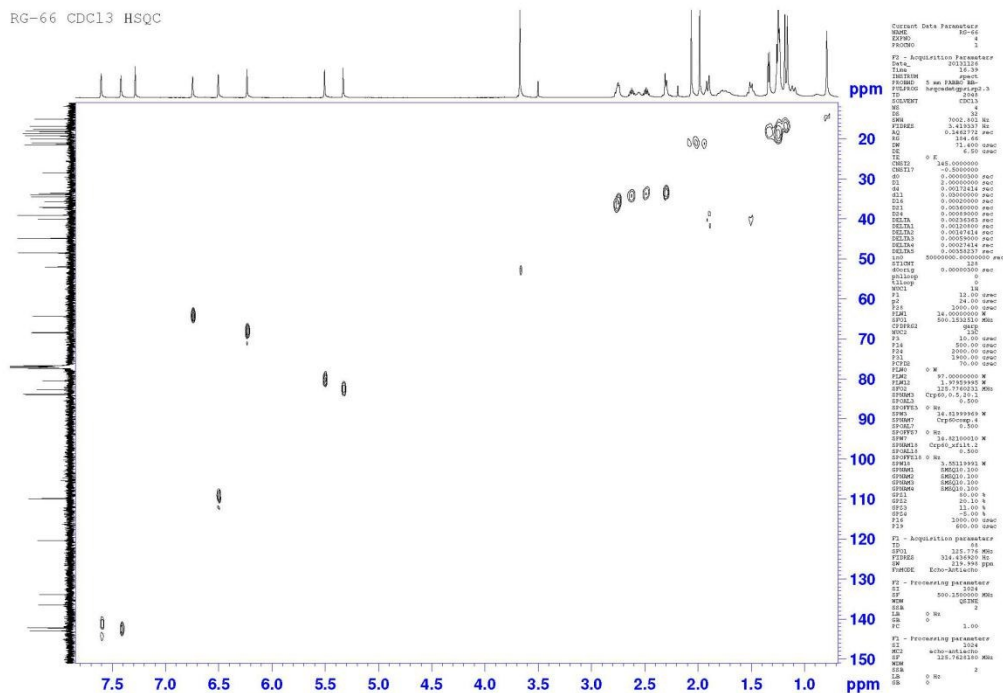

Figure S67. <sup>1</sup>H-<sup>1</sup>H COSY spectrum of compound **11** in CDCl<sub>3</sub>

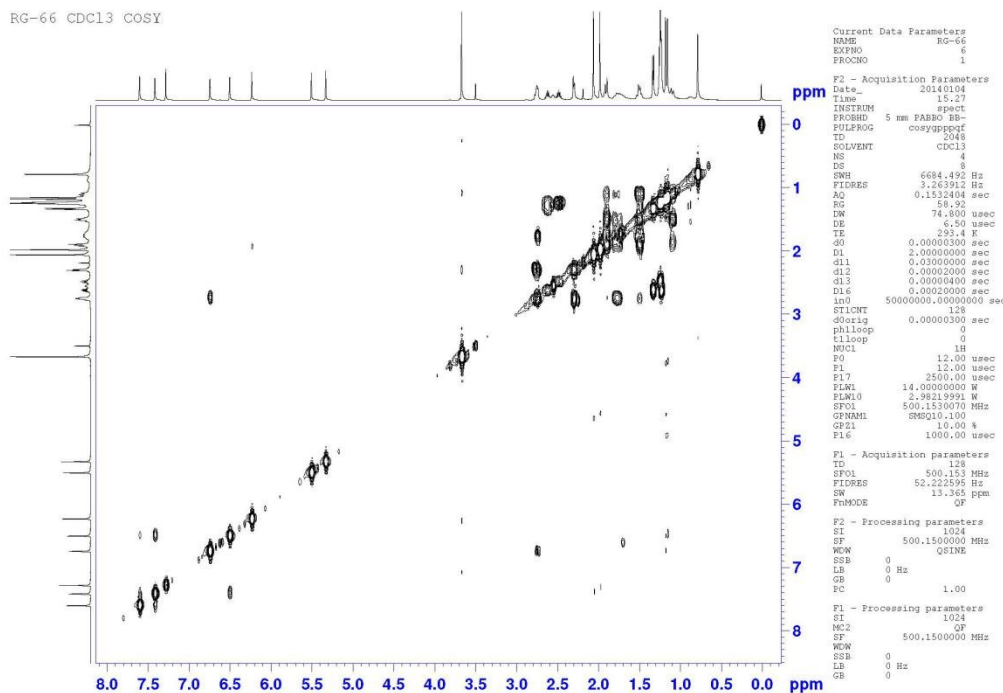



Figure S68. HMBC spectrum of compound **11** in CDCl<sub>3</sub>

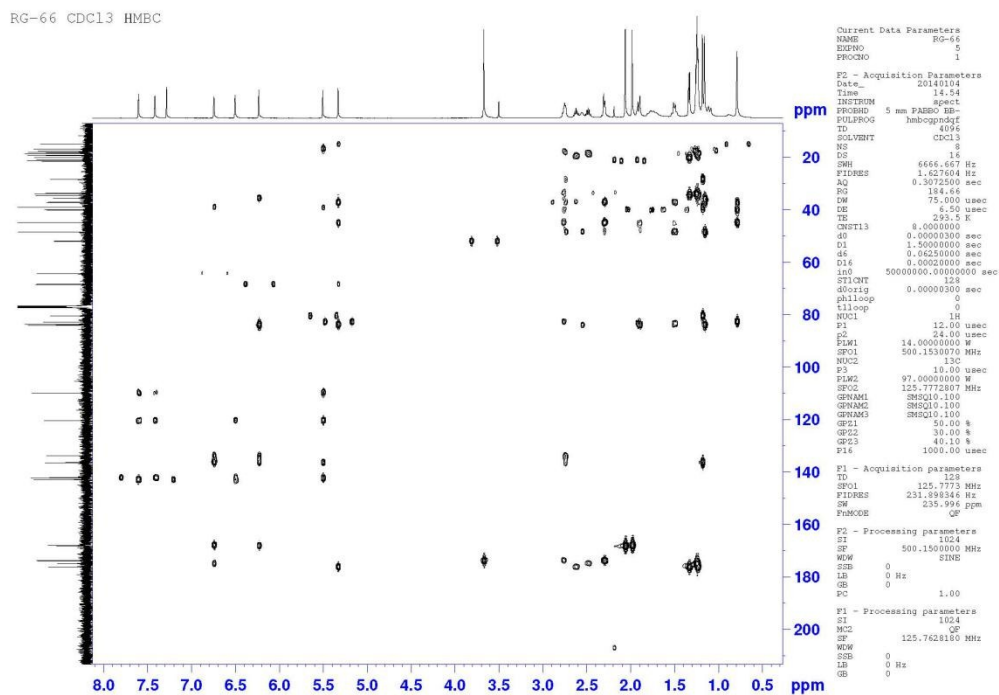

Figure S69. ROESY spectrum of compound **11** in CDCl<sub>3</sub>

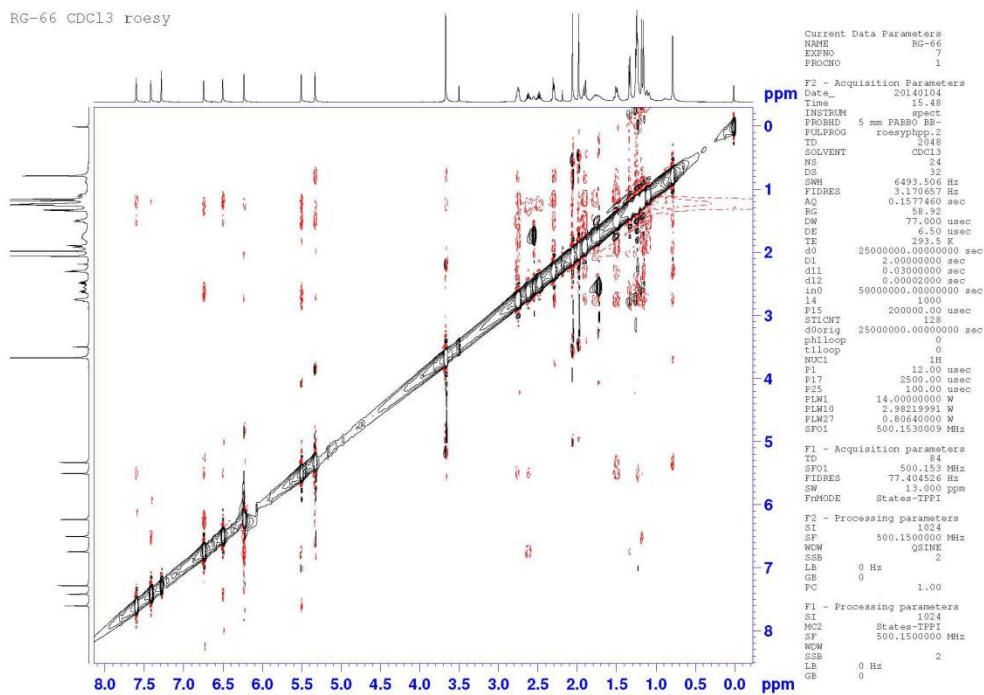

Figure S70. HRESI-MS spectrum of compound 11

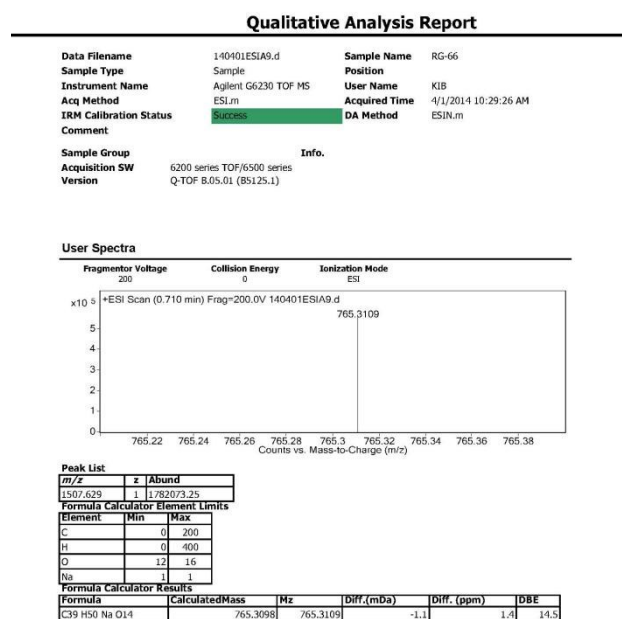

Figure S71. <sup>1</sup>H NMR (500 MHz, CDCl<sub>3</sub>) spectrum of compound 12

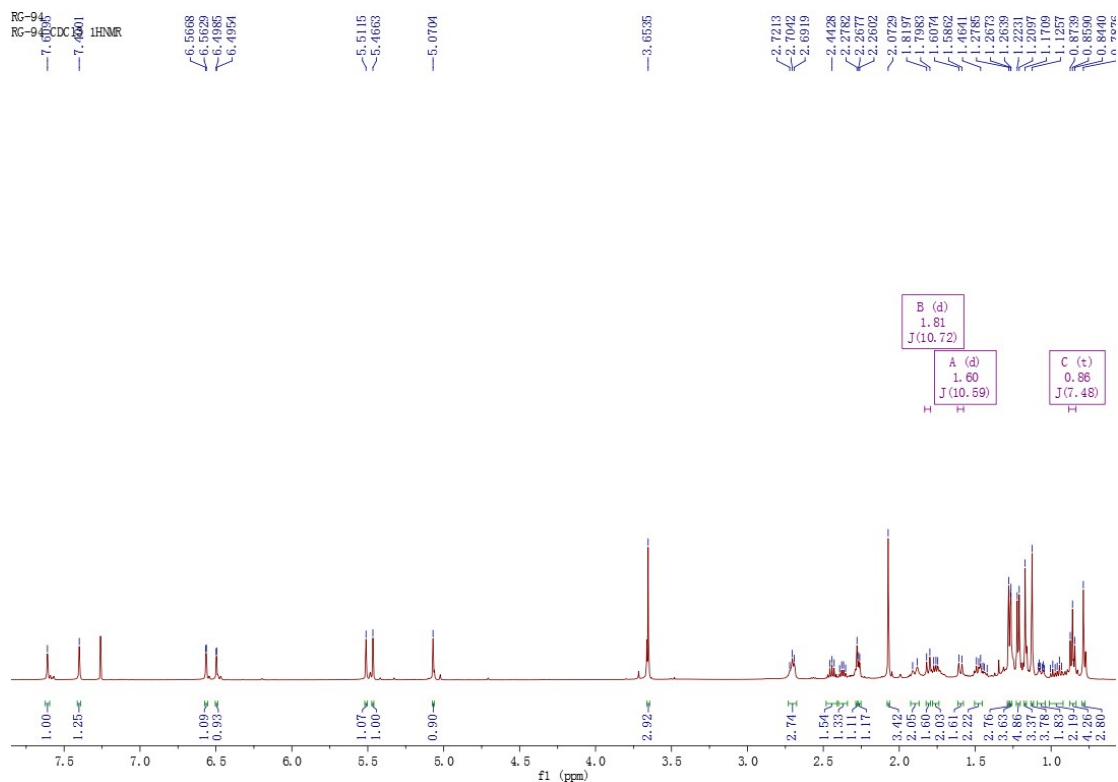

Figure S72.  $^{13}\text{C}$  NMR (125 MHz,  $\text{CDCl}_3$ ) spectrum of compound 12

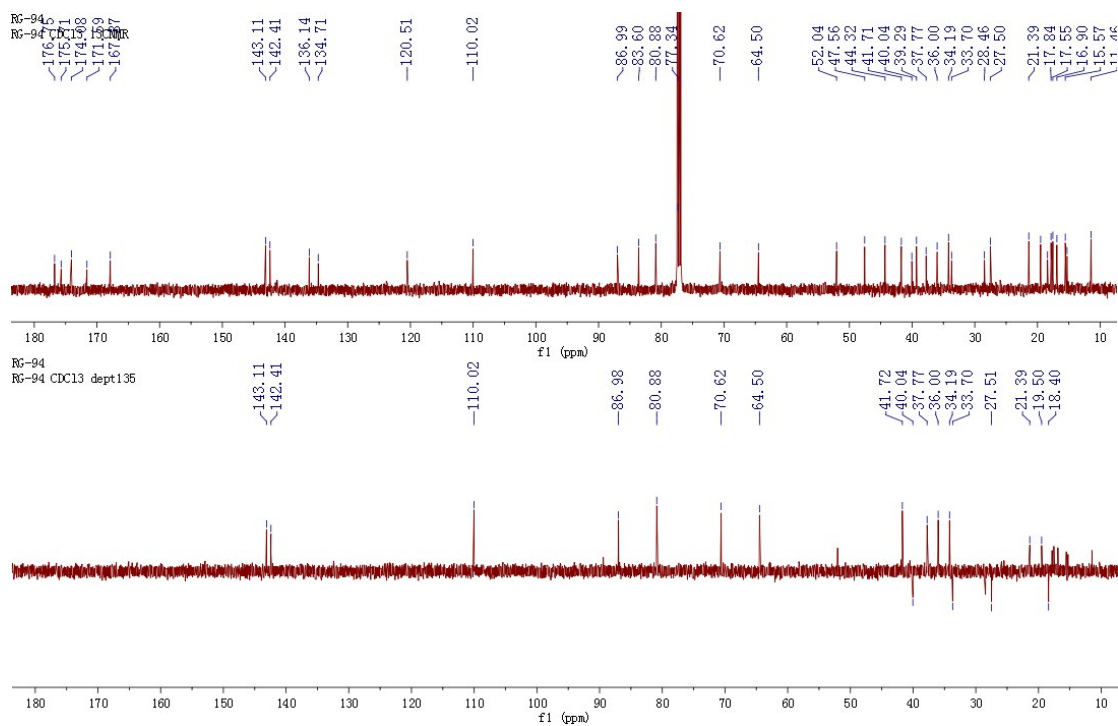

Figure S73. HSQC spectrum of compound 12 in  $\text{CDCl}_3$

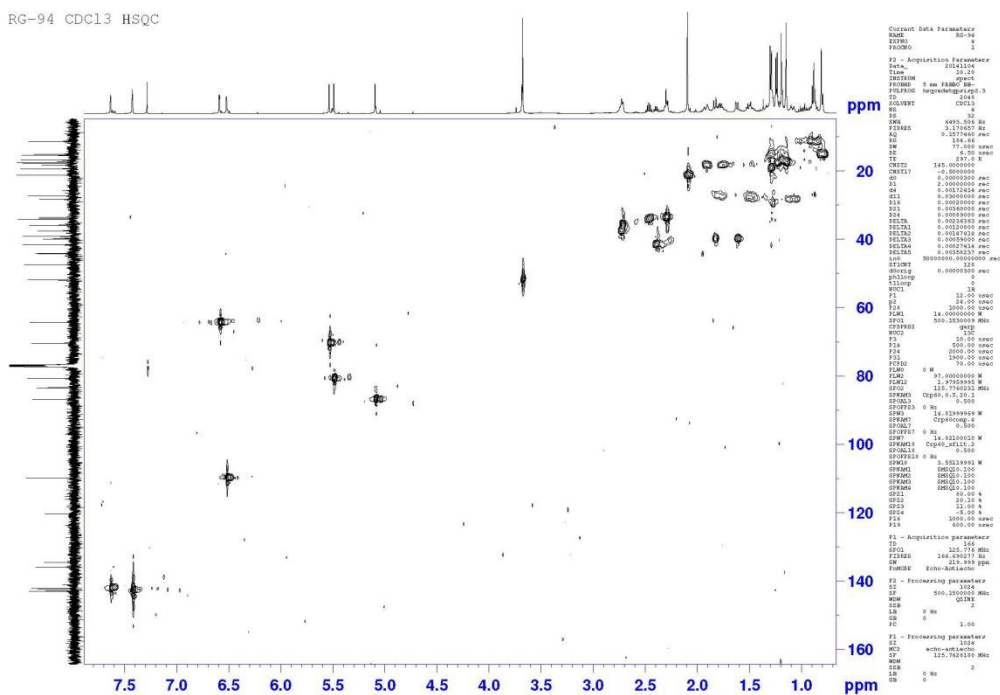

Figure S74.  $^1\text{H}$ - $^1\text{H}$  COSY spectrum of compound 12 in  $\text{CDCl}_3$

RG-94 CDC13 COSY

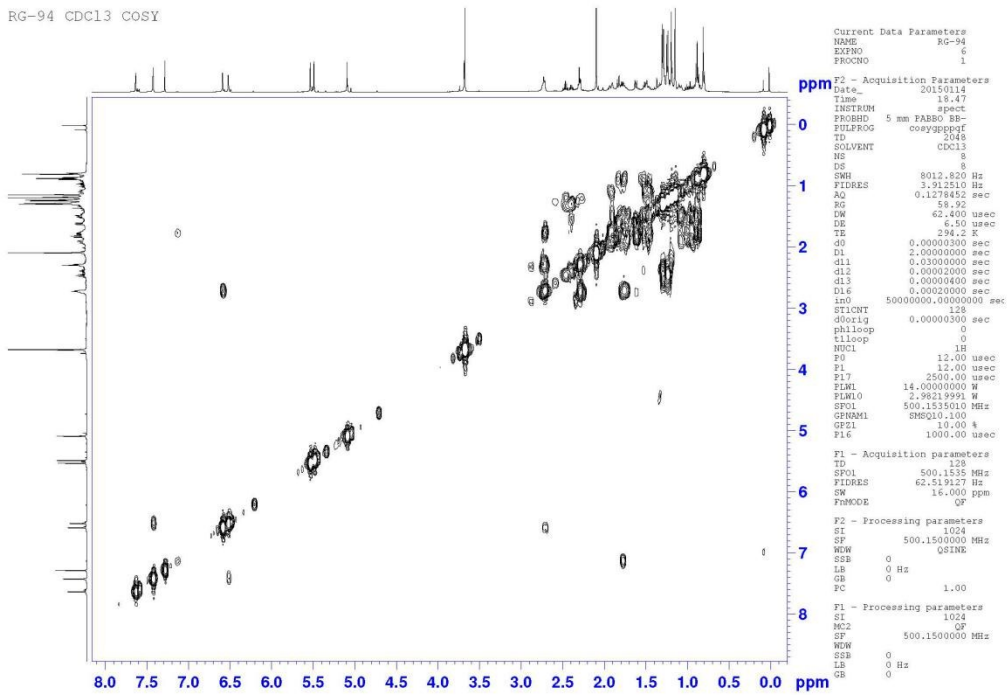

Figure S75. HMBC spectrum of compound 12 in CDCl<sub>3</sub>

RG-94 CDC13 HMBC

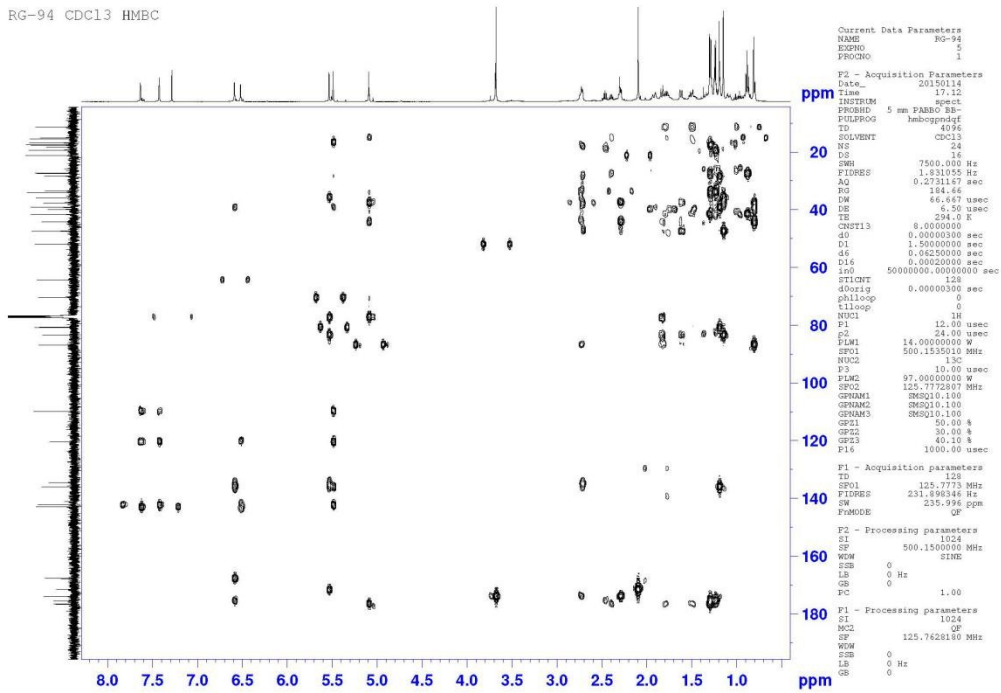

Figure S76. ROESY spectrum of compound 12 in CDCl<sub>3</sub>

RG-94 CDC13 roesy

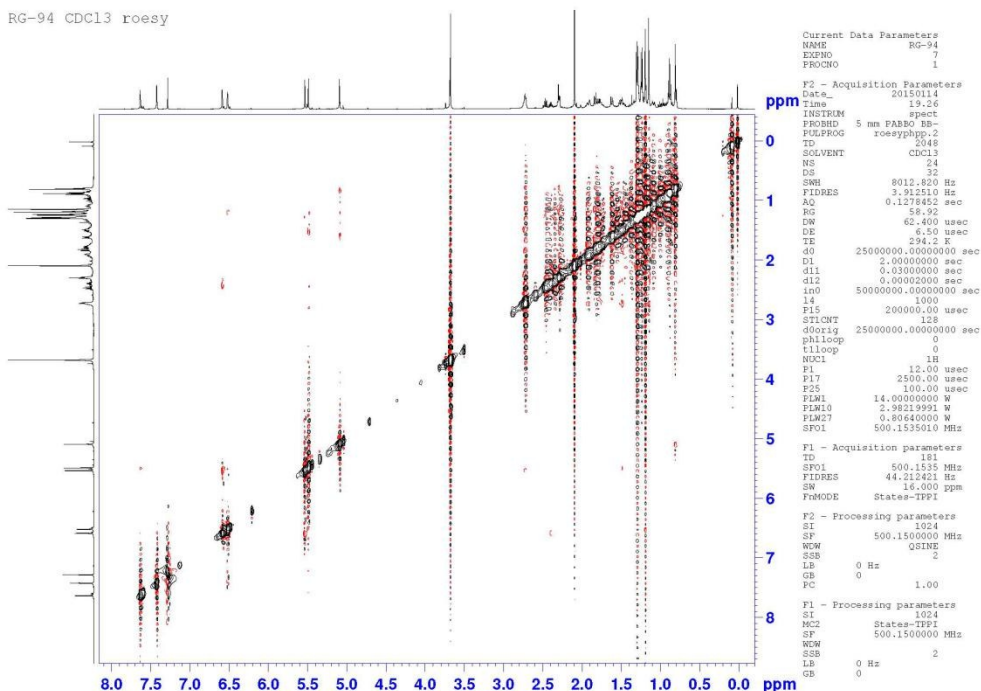

```

Current Data Parameters
NAME      RG-94
EXPNO    7
PROCNO   1

F2 - Acquisition Parameters
Date_    20150114
Time     15:26
INSTRUM  spect
PROBHD   5 mm F400 BB-
PULPROG  roesypph2
TD        2048
SOLVENT  CDCl3
NS        24
DS        32
SWH       8012.820 Hz
FIDRES    3.912510 Hz
AQ        0.1278452 sec
RG        58.92
DW        62.400 usec
DE        6.50 usec
TE        294.2 K
d0        25000000.00000000 sec
D1        2.00000000 sec
d11       0.03000000 sec
d12       0.00020000 sec
in0       50000000.00000000 sec
I4        1000
F15       200000.00 usec
STICHT    128
dloopip  25000000.00000000 sec
philoop   0
tilloop   0
MAGIC     1B
P1         12.00 usec
P17       2500.00 usec
F25       100.00 usec
PLM1      14.00000000 W
PLM0      2.38219921 W
PLM27     0.80640000 W
SFO1      500.1535010 MHz

F1 - Acquisition parameters
TD         181
SFO1      500.1535 MHz
FIDRES    44.212423 Hz
SW        16.008 ppm
FRMODE    States-TPPI

F2 - Processing parameters
SI         1024
SF        500.1500000 MHz
WDM       QSINE
SSB       2
LB         0 Hz
GB         0
PC         1.00

F1 - Processing parameters
SI         1024
MCC       States-TPPI
SF        500.1500000 MHz
WDM       QSINE
SSB       2
LB         0 Hz
GB         0
    
```

Figure S77. HRESI-MS spectrum of compound 12

### Qualitative Analysis Report

|                               |                             |                      |                      |
|-------------------------------|-----------------------------|----------------------|----------------------|
| <b>Data Filename</b>          | RG-94.d                     | <b>Sample Name</b>   | RG-94                |
| <b>Sample Type</b>            | Sample                      | <b>Position</b>      | P1-B1                |
| <b>Instrument Name</b>        | Instrument 1                | <b>User Name</b>     |                      |
| <b>Acq Method</b>             | SIBU.m                      | <b>Acquired Time</b> | 8/27/2015 3:13:26 PM |
| <b>IRM Calibration Status</b> | Success                     | <b>DA Method</b>     | Default.m            |
| <b>Comment</b>                |                             |                      |                      |
| <b>Sample Group</b>           |                             | <b>Info.</b>         |                      |
| <b>Acquisition SW</b>         | 6200 series TOF/6500 series |                      |                      |
| <b>Version</b>                | Q-TOF B.05.01 (B5125.2)     |                      |                      |

### User Spectra

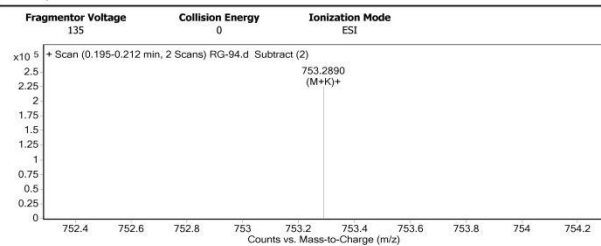

| Peak List | m/z      | z | Abund     | Formula     | Ion    |
|-----------|----------|---|-----------|-------------|--------|
|           | 732.3595 | 1 | 161274.03 |             |        |
|           | 733.3625 | 1 | 64639.16  |             |        |
|           | 737.3148 | 1 | 124471.61 |             |        |
|           | 738.3182 | 1 | 47153.57  |             |        |
|           | 753.289  | 1 | 225409.59 | C38 H50 O13 | (M+K)+ |
|           | 754.292  | 1 | 94869.48  | C38 H50 O13 | (M+K)+ |
|           | 755.2919 | 1 | 35233.45  | C38 H50 O13 | (M+K)+ |
|           | 760.3903 | 1 | 29949.78  |             |        |

### Formula Calculator Element Limits

| Element | Min | Max |
|---------|-----|-----|
| C       | 3   | 60  |
| H       | 0   | 120 |
| O       | 0   | 30  |

### Formula Calculator Results

| Formula     | CalculatedMass | CalculatedMz | Mz       | Diff. (mBa) | Diff. (ppm) | DBE     |
|-------------|----------------|--------------|----------|-------------|-------------|---------|
| C38 H50 O13 | 714.3251       | 753.2883     | 753.2890 | -0.6        | -0.8        | 14.0000 |

Figure S78. <sup>1</sup>H NMR (500 MHz, CDCl<sub>3</sub>) spectrum of compound 13

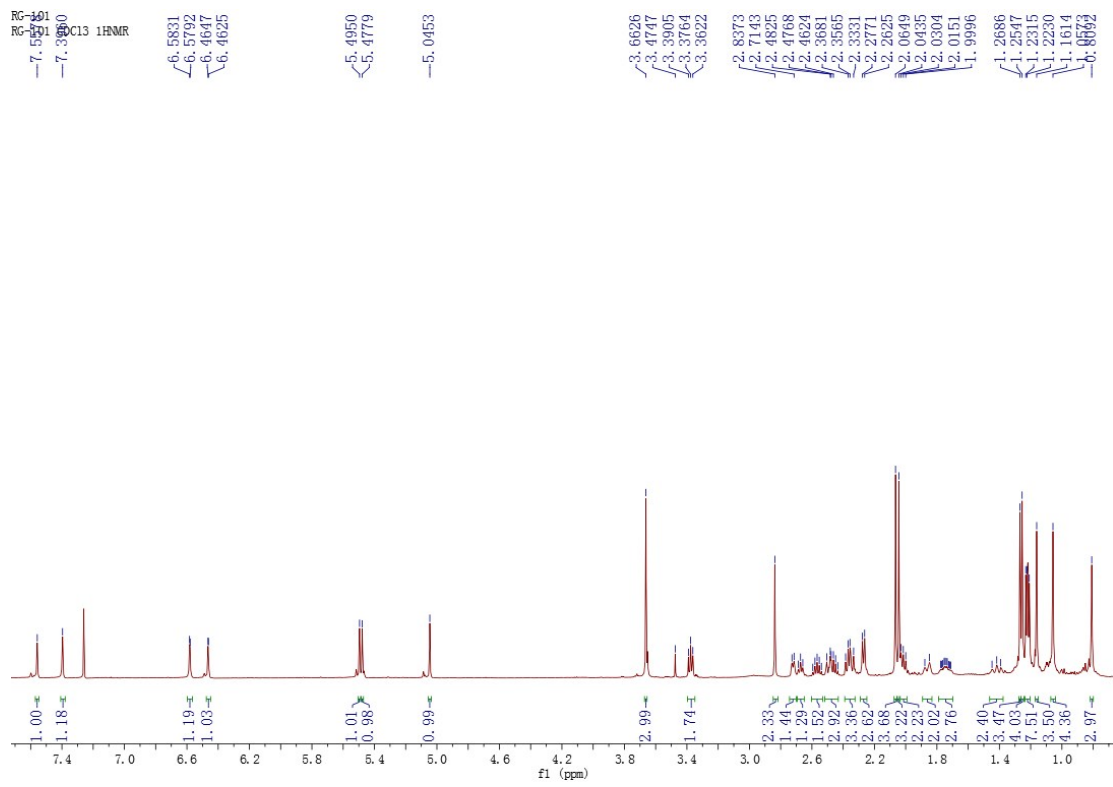

Figure S79. <sup>13</sup>C NMR (125 MHz, CDCl<sub>3</sub>) spectrum of compound **13**

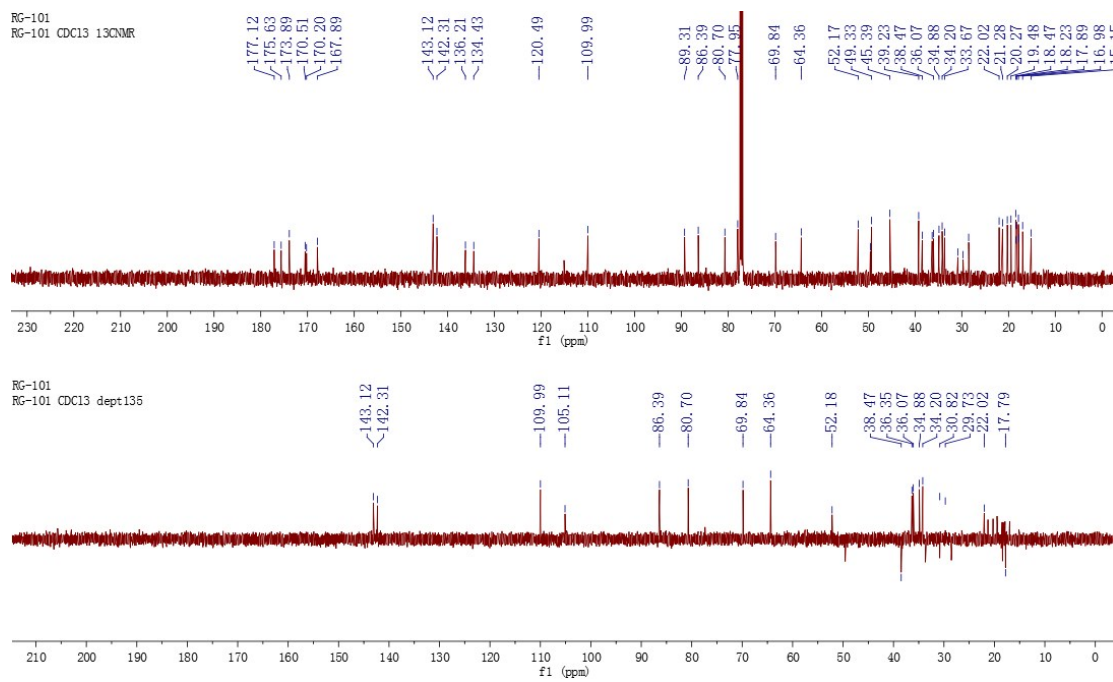

Figure S80. HSQC spectrum of compound **13** in CDCl<sub>3</sub>

RG-101 CDCl3 HSQC

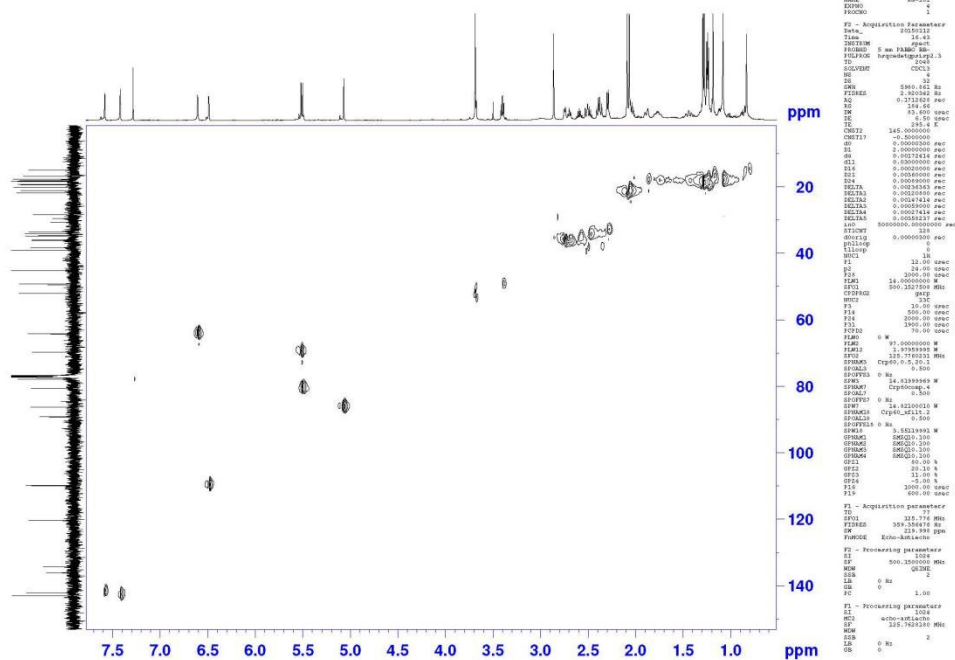

Figure S81.  $^1\text{H}$ - $^1\text{H}$  COSY spectrum of compound **13** in  $\text{CDCl}_3$

RG-101 CDCl3 COSY

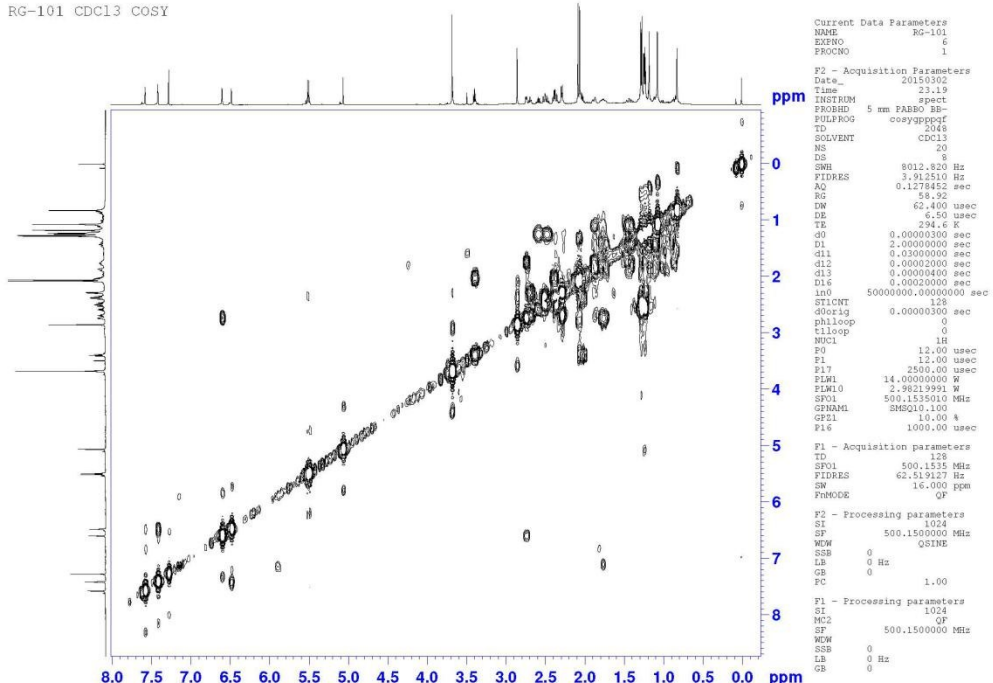

Figure S82. HMBC spectrum of compound **13** in  $\text{CDCl}_3$

RG-101 CDCl3 HMBC

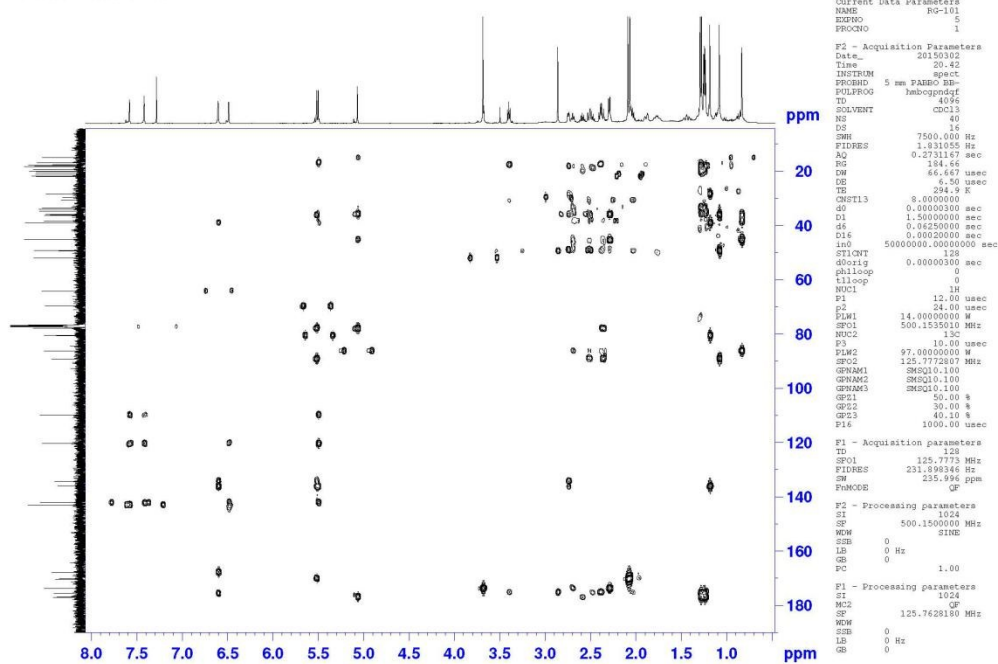

Figure S83. ROESY spectrum of compound 13 in CDCl<sub>3</sub>

RG-101 CDCl3 roesy

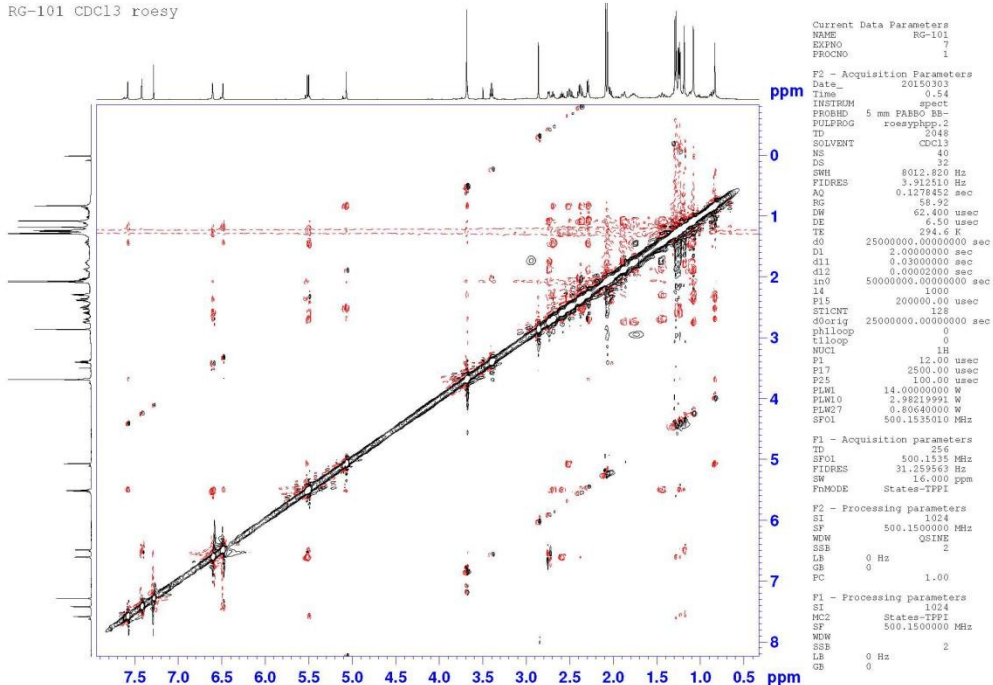

Figure S84. HRESI-MS spectrum of compound 13



## Qualitative Analysis Report

|                               |              |                      |                      |
|-------------------------------|--------------|----------------------|----------------------|
| <b>Data Filename</b>          | RG-101.d     | <b>Sample Name</b>   | RG-101               |
| <b>Sample Type</b>            | Sample       | <b>Position</b>      | P1-B4                |
| <b>Instrument Name</b>        | Instrument 1 | <b>User Name</b>     |                      |
| <b>Acq Method</b>             | SIBU.m       | <b>Acquired Time</b> | 8/27/2015 3:17:48 PM |
| <b>IRM Calibration Status</b> | Success      | <b>DA Method</b>     | Default.m            |
| <b>Comment</b>                |              |                      |                      |

|                       |                             |              |
|-----------------------|-----------------------------|--------------|
| <b>Sample Group</b>   |                             | <b>Info.</b> |
| <b>Acquisition SW</b> | 6200 series TOF/6500 series |              |
| <b>Version</b>        | Q-TOF B.05.01 (B5125.2)     |              |

### User Spectra

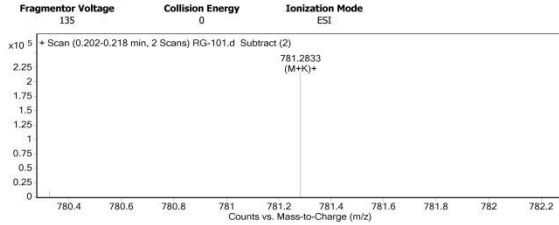

#### Peak List

| m/z      | z | Abund     | Formula     | Ion    |
|----------|---|-----------|-------------|--------|
| 760.3542 | 1 | 185482.25 |             |        |
| 761.3571 | 1 | 75008.16  |             |        |
| 765.3091 | 1 | 144866.84 |             |        |
| 766.3125 | 1 | 58542.14  |             |        |
| 781.2833 | 1 | 215877.2  | C39 H50 O14 | (M+K)+ |
| 782.2867 | 1 | 90177.84  | C39 H50 O14 | (M+K)+ |
| 783.2864 | 1 | 38459.95  | C39 H50 O14 | (M+K)+ |
| 788.3852 | 1 | 39626.17  |             |        |

#### Formula Calculator Element Limits

| Element | Min | Max |
|---------|-----|-----|
| C       | 3   | 60  |
| H       | 0   | 120 |
| O       | 0   | 30  |

#### Formula Calculator Results

| Formula     | CalculatedMass | CalculatedMz | Mz       | Diff. (mDa) | Diff. (ppm) | DBE     |
|-------------|----------------|--------------|----------|-------------|-------------|---------|
| C39 H50 O14 | 742.3201       | 781.2832     | 781.2833 | -0.1        | -0.1        | 15.0000 |

Figure S85. <sup>1</sup>H NMR (500 MHz, CDCl<sub>3</sub>) spectrum of compound **14**

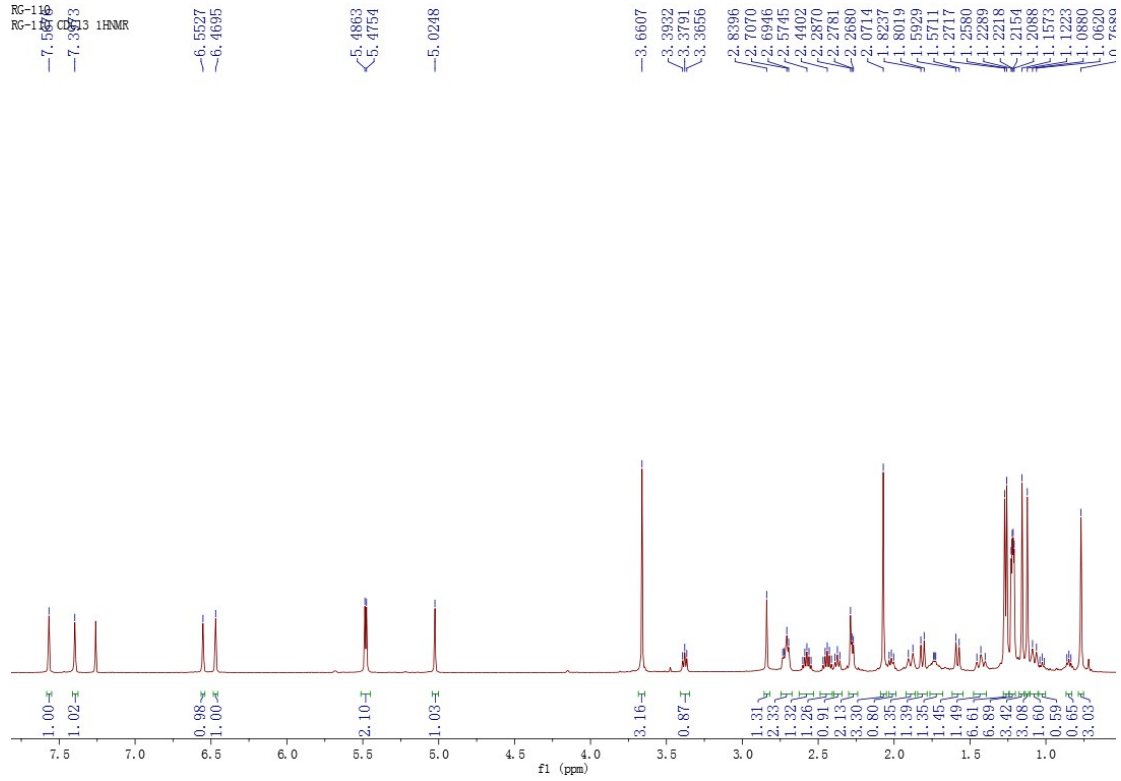

Figure S86. <sup>13</sup>C NMR (125 MHz, CDCl<sub>3</sub>) spectrum of compound **14**

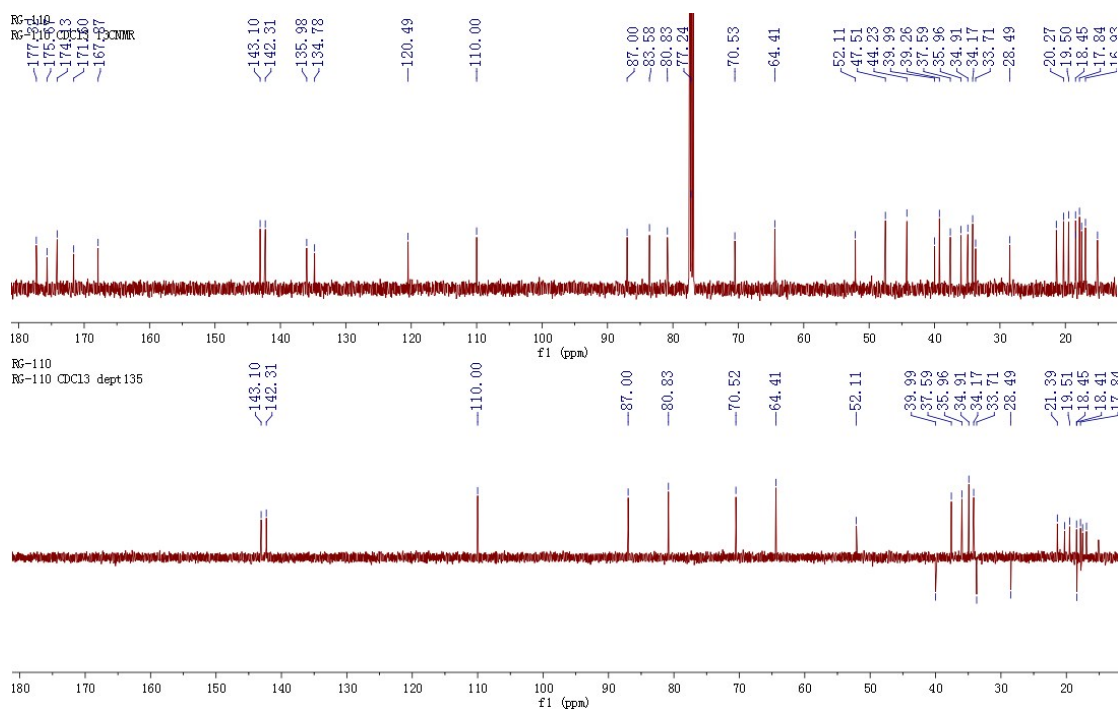

Figure S87. HSQC spectrum of compound **14** in CDCl<sub>3</sub>

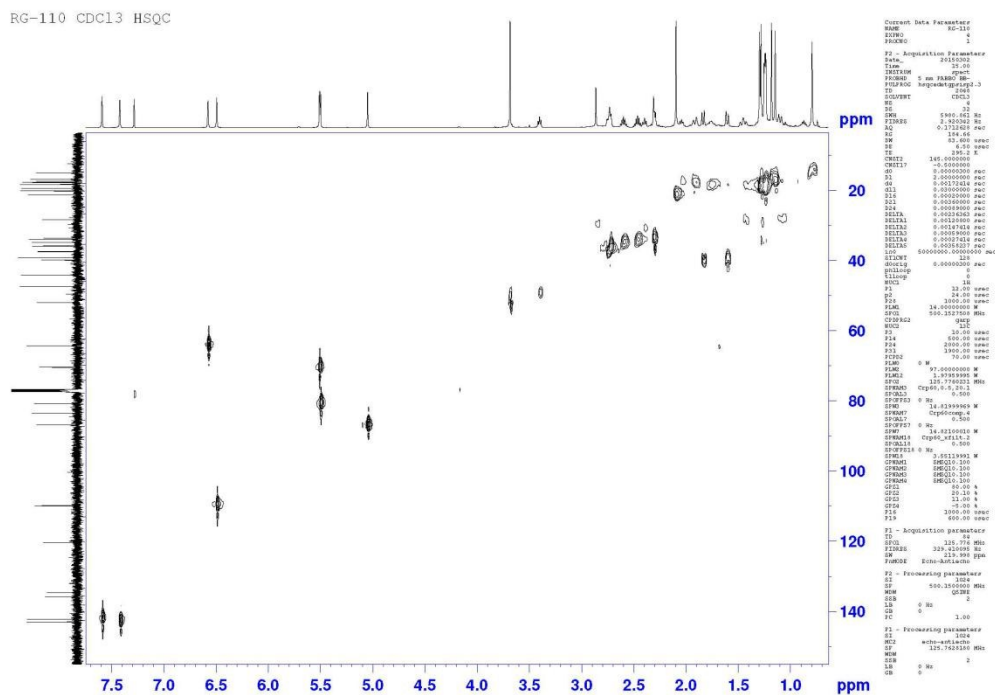

Figure S88.  $^1\text{H}$ - $^1\text{H}$  COSY spectrum of compound **14** in  $\text{CDCl}_3$

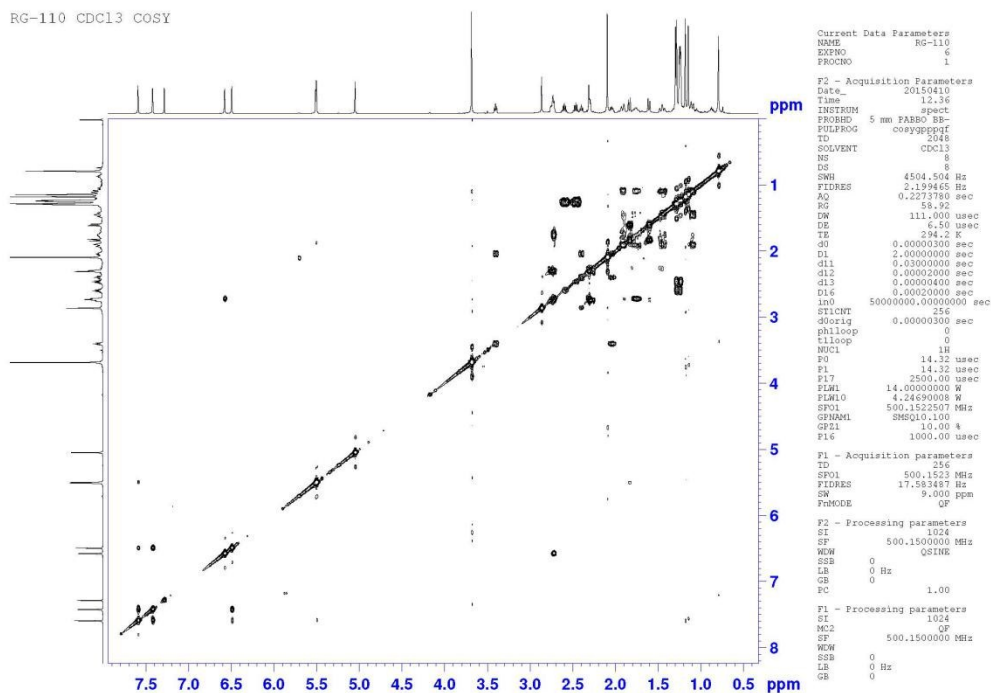

Figure S89. HMBC spectrum of compound **14** in  $\text{CDCl}_3$

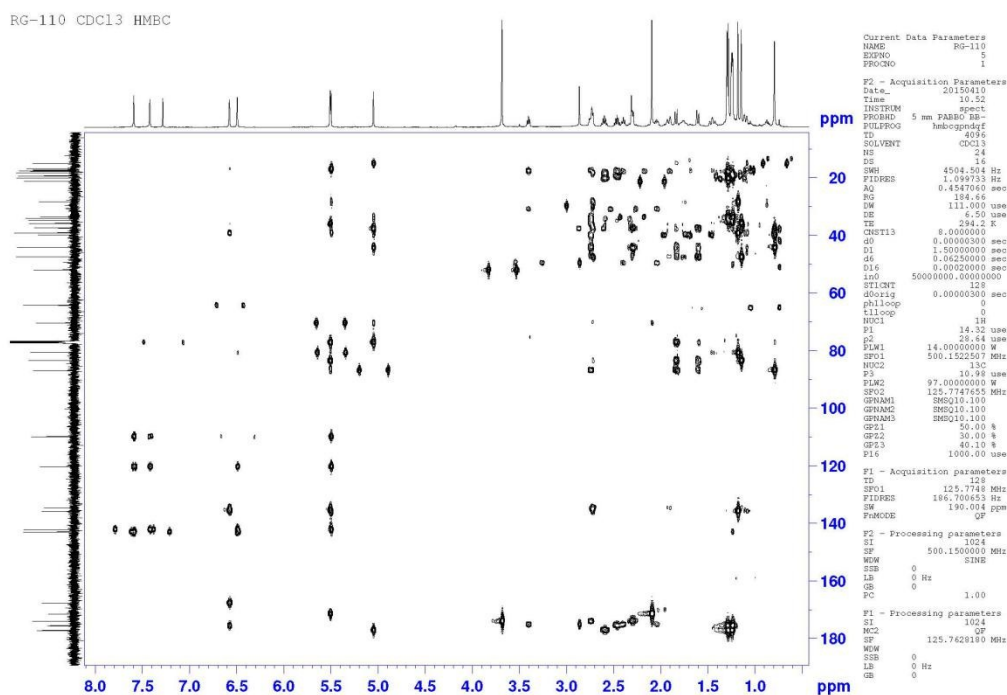

Figure S90. ROESY spectrum of compound 14 in CDCl<sub>3</sub>

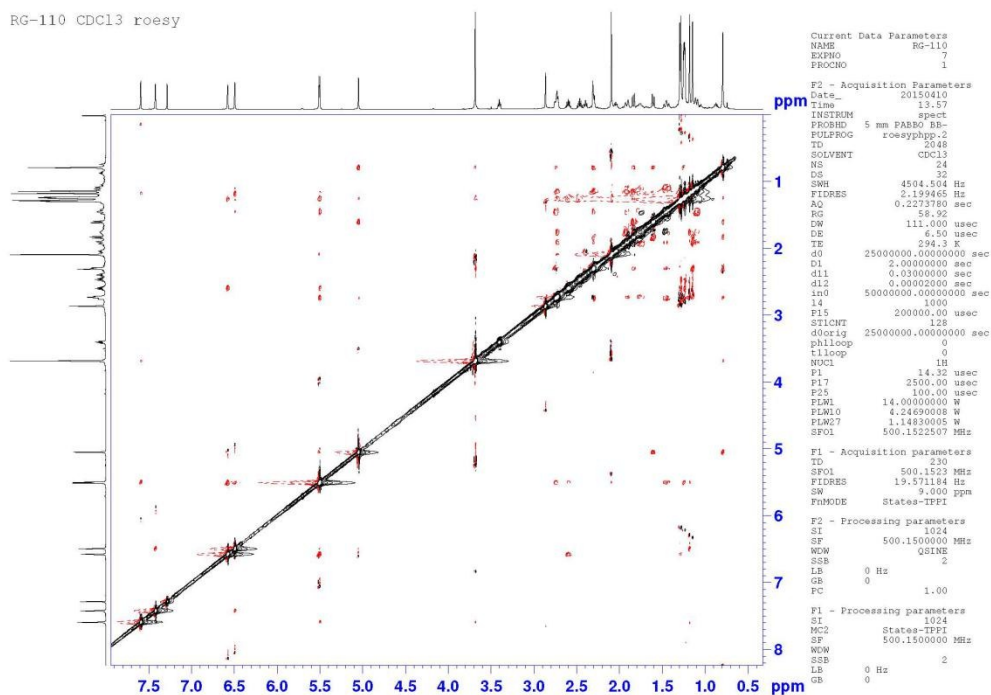

Figure S91. HRESI-MS spectrum of compound 14

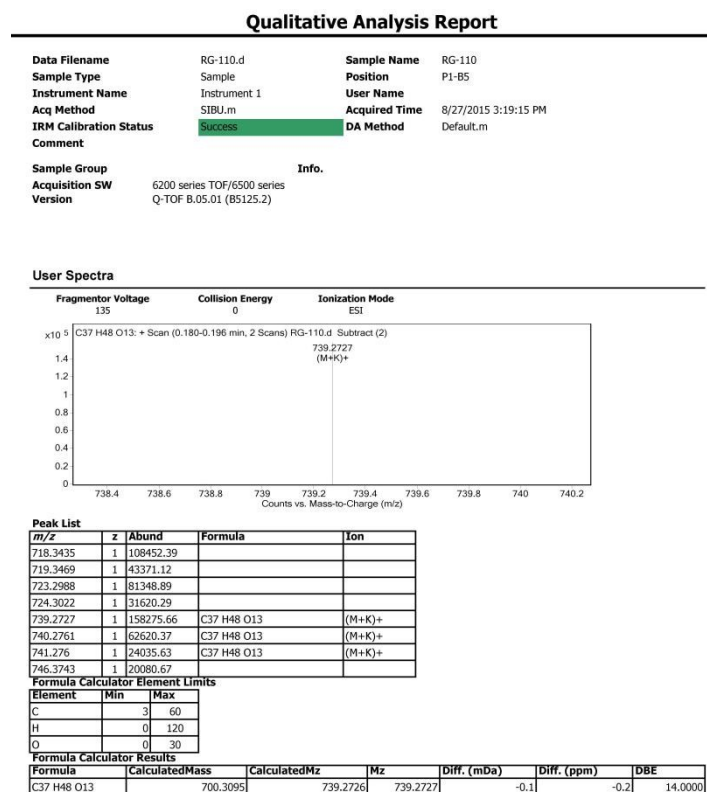

Figure S92. Key ROESY correlations of **1-4**, **5-7** and **10-14**

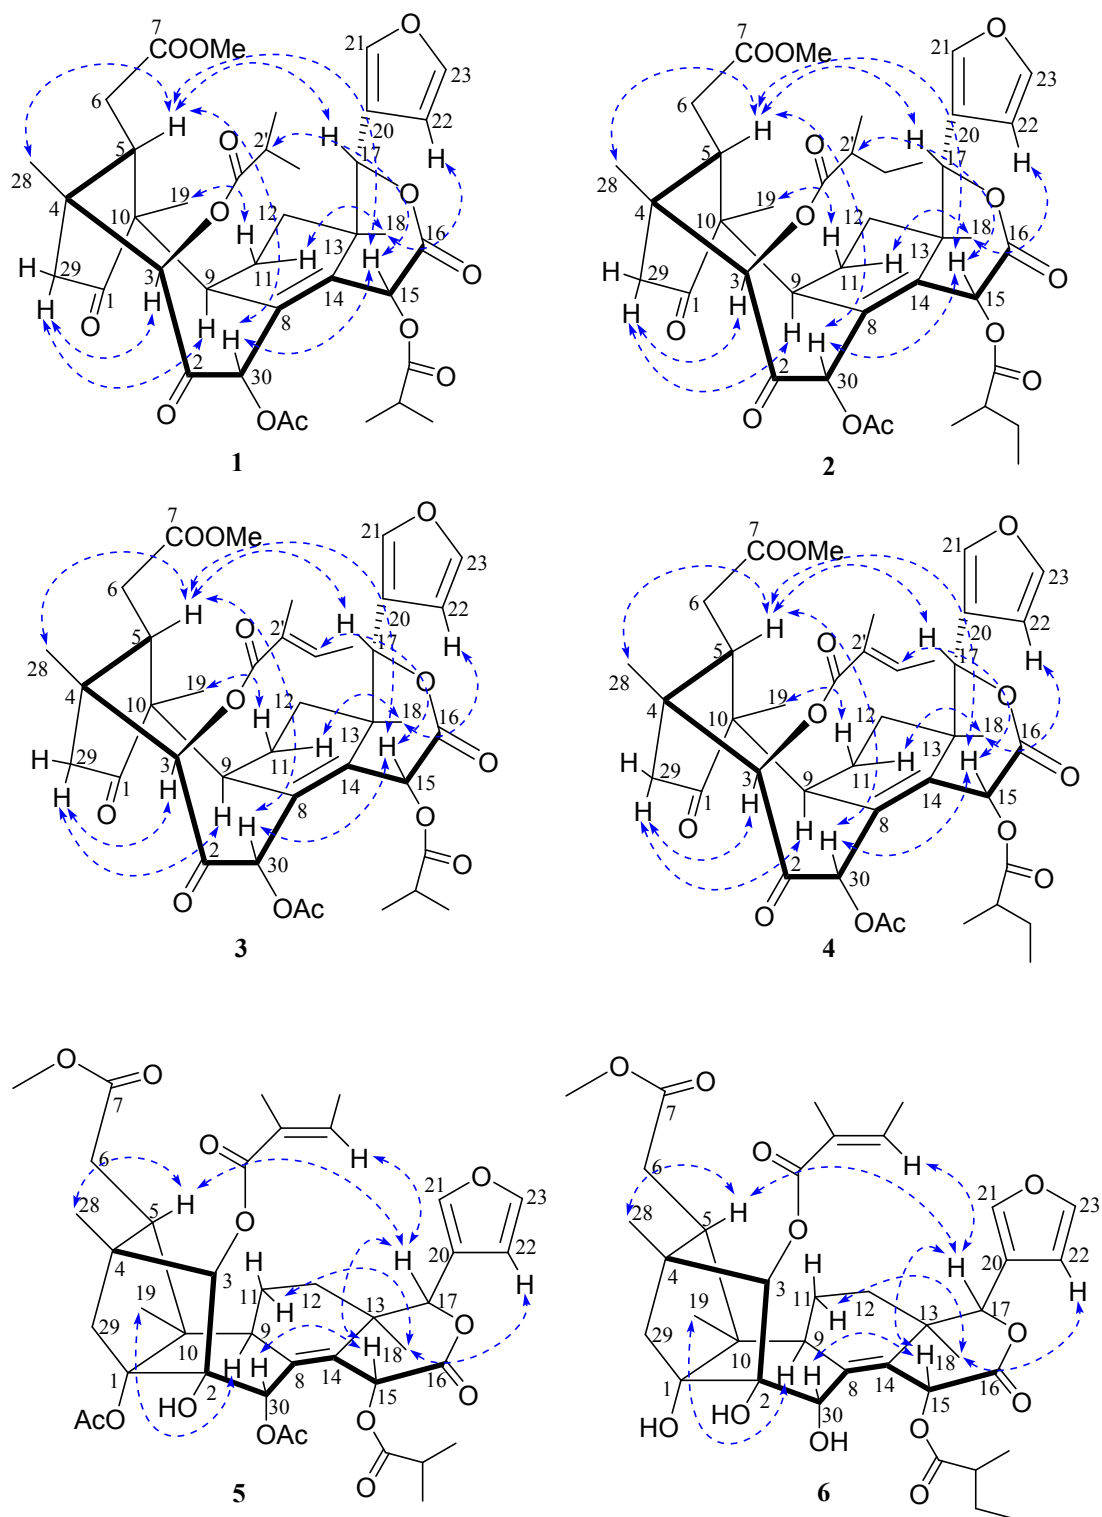

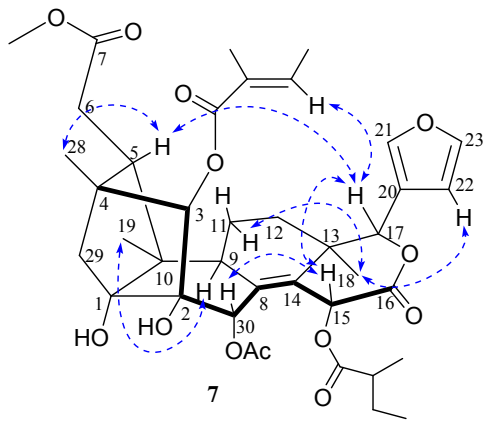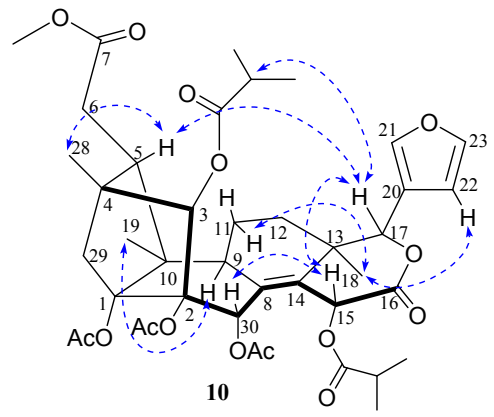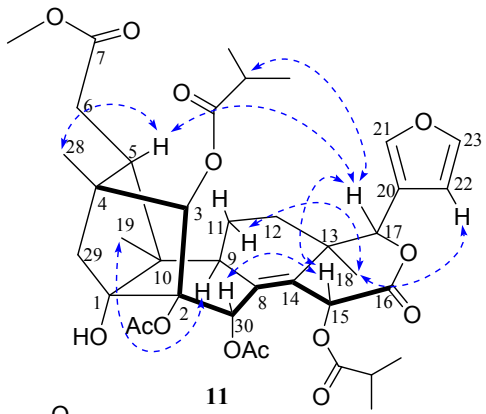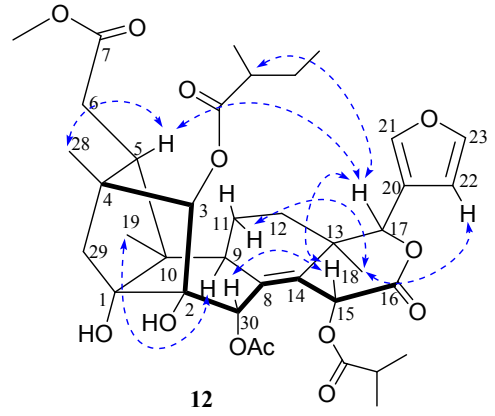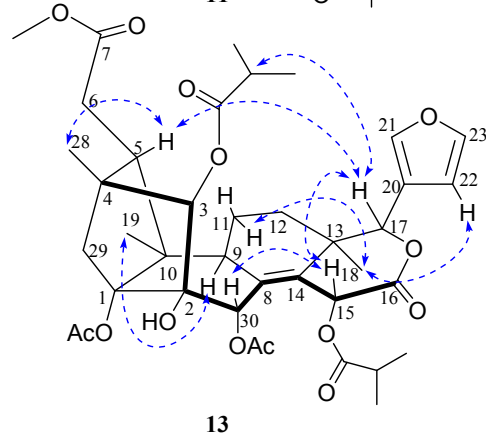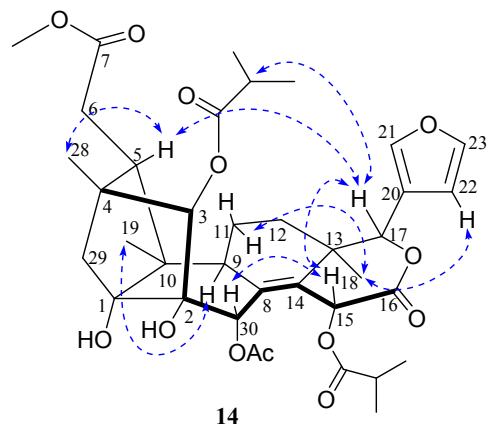

## Experimental parameters of all 2D NMR

Table 1 HSQC experimental parameters of compound **1**

Table 2  $^1\text{H}$ - $^1\text{H}$  COSY experimental parameters of compound **1**

Table 3 HMBC experimental parameters of compound **1**

Table 4 ROESY experimental parameters of compound **1**

Table 5 HSQC experimental parameters of compound **2**

Table 6  $^1\text{H}$ - $^1\text{H}$  COSY experimental parameters of compound **2**

Table 7 HMBC experimental parameters of compound **2**

Table 8 ROESY experimental parameters of compound **2**

Table 9 HSQC experimental parameters of compound **3**

Table 10  $^1\text{H}$ - $^1\text{H}$  COSY experimental parameters of compound **3**

Table 11 HMBC experimental parameters of compound **3**

Table 12 ROESY experimental parameters of compound **3**

Table 13 HSQC experimental parameters of compound **4**

Table 14  $^1\text{H}$ - $^1\text{H}$  COSY experimental parameters of compound **4**

Table 15 HMBC experimental parameters of compound **4**

Table 16 ROESY experimental parameters of compound **4**

Table 17 HSQC experimental parameters of compound **5**

Table 18  $^1\text{H}$ - $^1\text{H}$  COSY experimental parameters of compound **5**

Table 19 HMBC experimental parameters of compound **5**

Table 20 ROESY experimental parameters of compound **5**

Table 17 HSQC experimental parameters of compound **5**

Table 18  $^1\text{H}$ - $^1\text{H}$  COSY experimental parameters of compound **5**

Table 19 HMBC experimental parameters of compound **5**

Table 20 ROESY experimental parameters of compound **5**

Table 21 HSQC experimental parameters of compound **6**

Table 22  $^1\text{H}$ - $^1\text{H}$  COSY experimental parameters of compound **6**

Table 23 HMBC experimental parameters of compound **6**

Table 24 ROESY experimental parameters of compound **6**

Table 25 HSQC experimental parameters of compound **7**

Table 26  $^1\text{H}$ - $^1\text{H}$  COSY experimental parameters of compound **7**

Table 27 HMBC experimental parameters of compound **7**

Table 28 ROESY experimental parameters of compound **7**

Table 29 HSQC experimental parameters of compound **9**

Table 30  $^1\text{H}$ - $^1\text{H}$  COSY experimental parameters of compound **9**

Table 31 HMBC experimental parameters of compound **9**

Table 32 ROESY experimental parameters of compound **9**

Table 33 HSQC experimental parameters of compound **10**

Table 34  $^1\text{H}$ - $^1\text{H}$  COSY experimental parameters of compound **10**

Table 35 HMBC experimental parameters of compound **10**

Table 36 ROESY experimental parameters of compound **10**

Table 37 HSQC experimental parameters of compound **11**



Table 38  $^1\text{H}$ - $^1\text{H}$  COSY experimental parameters of compound **11**

Table 39 HMBC experimental parameters of compound **11**

Table 40 ROESY experimental parameters of compound **11**

Table 41 HSQC experimental parameters of compound **12**

Table 42  $^1\text{H}$ - $^1\text{H}$  COSY experimental parameters of compound **12**

Table 43 HMBC experimental parameters of compound **12**

Table 44 ROESY experimental parameters of compound **12**

Table 45 HSQC experimental parameters of compound **13**

Table 46  $^1\text{H}$ - $^1\text{H}$  COSY experimental parameters of compound **13**

Table 47 HMBC experimental parameters of compound **13**

Table 48 ROESY experimental parameters of compound **13**

Table 49 HSQC experimental parameters of compound **14**

Table 50  $^1\text{H}$ - $^1\text{H}$  COSY experimental parameters of compound **14**

Table 51 HMBC experimental parameters of compound **14**

Table 52 ROESY experimental parameters of compound **14**

Table 1 HSQC experimental parameters of compound **1**

|    | Parameter              | Value (f2, f1)                     |
|----|------------------------|------------------------------------|
| 1  | Comment                | RG-29 CDCl <sub>3</sub> HSQC       |
| 2  | Origin                 | Bruker BioSpin GmbH                |
| 3  | Owner                  | nmrsu                              |
| 4  | Site                   |                                    |
| 5  | Spectrometer           | spect                              |
| 6  | Author                 |                                    |
| 7  | Solvent                | CDCl <sub>3</sub>                  |
| 8  | Temperature            | 296.4 K                            |
| 9  | Pulse Sequence         | hsqcedetgpsisp2.3                  |
| 10 | Experiment             | 2D-HSQC-EDITED                     |
| 11 | Number of Scans        | 4                                  |
| 12 | Receiver Gain          | 185                                |
| 13 | Relaxation Delay       | 2.0000 sec                         |
| 14 | Pulse Width            | 12.0000 $\mu$ sec                  |
| 15 | Acquisition Time       | 0.1462 sec                         |
| 16 | Acquisition Date       | 2013-06-27T09:23:53                |
| 17 | Modification Date      | 2013-06-27T09:35:40                |
| 18 | Spectrometer Frequency | (500.15 MHz, 125.76 MHz)           |
| 19 | Spectral Width         | (7002.8 Hz, 27670.4 Hz)            |
| 20 | Lowest Frequency       | (-250.4 Hz, -630.1 Hz)             |
| 21 | Nucleus                | ( <sup>1</sup> H, <sup>13</sup> C) |
| 22 | Acquired Size          | (1024, 82)                         |
| 23 | Spectral Size          | (1024, 512)                        |

Table 2 <sup>1</sup>H-<sup>1</sup>H COSY experimental parameters of compound **1**

|   | Parameter | Value (f2, f1)               |
|---|-----------|------------------------------|
| 2 | Comment   | RG-29 CDCl <sub>3</sub> COSY |
| 3 | Origin    | Bruker BioSpin GmbH          |

|    |                        |                         |
|----|------------------------|-------------------------|
| 4  | Owner                  | nmrsu                   |
| 5  | Site                   |                         |
| 6  | Spectrometer           | spect                   |
| 7  | Author                 |                         |
| 8  | Solvent                | CDCl <sub>3</sub>       |
| 9  | Temperature            | 295.4 K                 |
| 10 | Pulse Sequence         | cosygpppqf              |
| 11 | Experiment             | 2D-COSY                 |
| 12 | Number of Scans        | 4                       |
| 13 | Receiver Gain          | 59                      |
| 14 | Relaxation Delay       | 2.0000 sec              |
| 15 | Pulse Width            | 12.0000 $\mu$ sec       |
| 16 | Acquisition Time       | 0.1532 sec              |
| 17 | Acquisition Date       | 2013-07-01T10:08:52     |
| 18 | Modification Date      | 2013-07-01T10:27:34     |
| 19 | Spectrometer Frequency | (500.15 MHz, 500.15MHz) |
| 20 | Spectral Width         | (6684.5 Hz, 6684.5 Hz)  |
| 21 | Lowest Frequency       | (-335.2 Hz, -335.2 Hz)  |
| 22 | Nucleus                | (1H, 1H)                |
| 23 | Acquired Size          | (1024, 128)             |
| 24 | Spectral Size          | (1024, 1024)            |

Table 3 HMBC experimental parameters of compound 1

|    | Parameter       | Value (f2, f1)               |
|----|-----------------|------------------------------|
| 1  | Comment         | RG-29 CDCl <sub>3</sub> HMBC |
| 2  | Origin          | Bruker BioSpin GmbH          |
| 3  | Owner           | nmrsu                        |
| 4  | Site            |                              |
| 5  | Spectrometer    | spect                        |
| 6  | Author          |                              |
| 7  | Solvent         | CDCl <sub>3</sub>            |
| 8  | Temperature     | 294.9 K                      |
| 9  | Pulse Sequence  | hmbcgpndqf                   |
| 10 | Experiment      | 2D-HMBC                      |
| 11 | Number of Scans | 24                           |

|    |                        |                          |
|----|------------------------|--------------------------|
| 12 | Receiver Gain          | 185                      |
| 13 | Relaxation Delay       | 1.5000 sec               |
| 14 | Pulse Width            | 12.0000 $\mu$ sec        |
| 15 | Acquisition Time       | 0.3072 sec               |
| 16 | Acquisition Date       | 2013-07-01T09:08:03      |
| 17 | Modification Date      | 2013-07-01T10:08:18      |
| 18 | Spectrometer Frequency | (500.15 MHz, 125.76 MHz) |
| 19 | Spectral Width         | (6666.7 Hz, 29683.0 Hz)  |
| 20 | Lowest Frequency       | (-326.3 Hz, -378.8 Hz)   |
| 21 | Nucleus                | (1H, 13C)                |
| 22 | Acquired Size          | (2048, 81)               |
| 23 | Spectral Size          | (2048, 512)              |

Table 4 ROESY experimental parameters of compound **1**

|    | Parameter         | Value (f2, f1)                |
|----|-------------------|-------------------------------|
| 1  | Comment           | RG-29 CDCl <sub>3</sub> roesy |
| 2  | Origin            | Bruker BioSpin GmbH           |
| 3  | Owner             | nmrsu                         |
| 4  | Site              |                               |
| 5  | Spectrometer      | spect                         |
| 6  | Author            |                               |
| 7  | Solvent           | CDCl <sub>3</sub>             |
| 8  | Temperature       | 295.6 K                       |
| 9  | Pulse Sequence    | roesyphpp.2                   |
| 10 | Experiment        | 2D-ROESY                      |
| 11 | Number of Scans   | 16                            |
| 12 | Receiver Gain     | 59                            |
| 13 | Relaxation Delay  | 2.0000 sec                    |
| 14 | Pulse Width       | 12.0000 $\mu$ sec             |
| 15 | Acquisition Time  | 0.1577 sec                    |
| 16 | Acquisition Date  | 2013-07-01T10:29:34           |
| 17 | Modification Date | 2013-07-01T13:13:20           |
| 18 | Spectrometer      | (500.15 MHz, 500.15 MHz )     |
| 19 | Spectral Width    | (6493.5 Hz, 6502.0 Hz)        |

|    |                  |                        |
|----|------------------|------------------------|
| 20 | Lowest Frequency | (-245.9 Hz, -250.1 Hz) |
| 21 | Nucleus          | (1H, 1H)               |
| 22 | Acquired Size    | (1024, 256)            |
| 23 | Spectral Size    | (1024, 1024)           |

Table 5 HSQC experimental parameters of compound 2

|    | Parameter         | Value (f2, f1)               |
|----|-------------------|------------------------------|
| 1  | Comment           | RG-30 CDCl <sub>3</sub> HSQC |
| 2  | Origin            | Bruker BioSpin GmbH          |
| 3  | Owner             | nmrsu                        |
| 4  | Site              |                              |
| 5  | Spectrometer      | spect                        |
| 6  | Author            |                              |
| 7  | Solvent           | CDCl <sub>3</sub>            |
| 8  | Temperature       | 0.0 K                        |
| 9  | Pulse Sequence    | hsqcedetgpsisp2.3            |
| 10 | Experiment        | 2D-HSQC-EDITED               |
| 11 | Number of Scans   | 4                            |
| 12 | Receiver Gain     | 185                          |
| 13 | Relaxation Delay  | 2.0000 sec                   |
| 14 | Pulse Width       | 12.0000 $\mu$ sec            |
| 15 | Acquisition Time  | 0.1462 sec                   |
| 16 | Acquisition Date  | 2013-07-09T12:07:57          |
| 17 | Modification Date | 2013-07-09T12:28:40          |
| 18 | Spectrometer      | (500.15 MHz, 125.76 MHz)     |
| 19 | Spectral Width    | (7002.8 Hz, 27670.4 Hz)      |
| 20 | Lowest Frequency  | (-250.4 Hz, -630.1 Hz)       |
| 21 | Nucleus           | (1H, 13C)                    |
| 22 | Acquired Size     | (1024, 143)                  |
| 23 | Spectral Size     | (1024, 1024)                 |

Table 6 <sup>1</sup>H-<sup>1</sup>H COSY experimental parameters of compound 2

|   | Parameter | Value (f2, f1)               |
|---|-----------|------------------------------|
| 1 | Comment   | RG-30 CDCl <sub>3</sub> COSY |

|    |                   |                          |
|----|-------------------|--------------------------|
| 2  | Origin            | Bruker BioSpin GmbH      |
| 3  | Owner             | nmrsu                    |
| 4  | Site              |                          |
| 5  | Spectrometer      | spect                    |
| 6  | Author            |                          |
| 7  | Solvent           | CDCl <sub>3</sub>        |
| 8  | Temperature       | 295.3 K                  |
| 9  | Pulse Sequence    | cosygpppqf               |
| 10 | Experiment        | 2D-COSY                  |
| 11 | Number of Scans   | 4                        |
| 12 | Receiver Gain     | 59                       |
| 13 | Relaxation Delay  | 2.0000 sec               |
| 14 | Pulse Width       | 12.0000 $\mu$ sec        |
| 15 | Acquisition Time  | 0.1532 sec               |
| 16 | Acquisition Date  | 2013-07-22T15:30:57      |
| 17 | Modification Date | 2013-07-22T15:48:24      |
| 18 | Spectrometer      | (500.15 MHz, 500.15 MHz) |
| 19 | Spectral Width    | (6684.5 Hz, 6684.5 Hz)   |
| 20 | Lowest Frequency  | (-335.2 Hz, -335.2 Hz)   |
| 21 | Nucleus           | (1H, 1H)                 |
| 22 | Acquired Size     | (1024, 119)              |
| 23 | Spectral Size     | (1024, 1024)             |

Table 7 HMBC experimental parameters of compound 2

|   | Parameter      | Value (f2, f1)               |
|---|----------------|------------------------------|
| 1 | Comment        | RG-30 CDCl <sub>3</sub> HMBC |
| 2 | Origin         | Bruker BioSpin GmbH          |
| 3 | Owner          | nmrsu                        |
| 4 | Site           |                              |
| 5 | Spectrometer   | spect                        |
| 6 | Author         |                              |
| 7 | Solvent        | CDCl <sub>3</sub>            |
| 8 | Temperature    | 295.4 K                      |
| 9 | Pulse Sequence | hmbcgpndqf                   |

|    |                   |                                    |
|----|-------------------|------------------------------------|
| 10 | Experiment        | 2D-HMBC                            |
| 11 | Number of Scans   | 8                                  |
| 12 | Receiver Gain     | 185                                |
| 13 | Relaxation Delay  | 1.5000 sec                         |
| 14 | Pulse Width       | 12.0000 $\mu$ sec                  |
| 15 | Acquisition Time  | 0.3072 sec                         |
| 16 | Acquisition Date  | 2013-07-22T14:58:32                |
| 17 | Modification Date | 2013-07-22T15:30:24                |
| 18 | Spectrometer      | (500.15 MHz, 125.76 MHz)           |
| 19 | Spectral Width    | (6666.7 Hz, 29683.0 Hz)            |
| 20 | Lowest Frequency  | (-326.3 Hz, -378.8 Hz)             |
| 21 | Nucleus           | ( <sup>1</sup> H, <sup>13</sup> C) |
| 22 | Acquired Size     | (2048, 128)                        |
| 23 | Spectral Size     | (2048, 512)                        |

Table 8 ROESY experimental parameters of compound 2

|    | Parameter         | Value (f2, f1)                |
|----|-------------------|-------------------------------|
| 1  | Comment           | RG-30 CDCl <sub>3</sub> roesy |
| 2  | Origin            | Bruker BioSpin GmbH           |
| 3  | Owner             | nmrsu                         |
| 4  | Site              |                               |
| 5  | Spectrometer      | spect                         |
| 6  | Author            |                               |
| 7  | Solvent           | CDCl <sub>3</sub>             |
| 8  | Temperature       | 295.4 K                       |
| 9  | Pulse Sequence    | roesyhpp.2                    |
| 10 | Experiment        | 2D-ROESY                      |
| 11 | Number of Scans   | 24                            |
| 12 | Receiver Gain     | 59                            |
| 13 | Relaxation Delay  | 2.0000 sec                    |
| 14 | Pulse Width       | 12.0000 $\mu$ sec             |
| 15 | Acquisition Time  | 0.1577 sec                    |
| 16 | Acquisition Date  | 2013-07-22T15:50:43           |
| 17 | Modification Date | 2013-07-22T16:51:44           |
| 18 | Spectrometer      | (500.15 MHz, 500.15 MHz)      |

|    |                  |                        |
|----|------------------|------------------------|
| 19 | Spectral Width   | (6493.5 Hz, 6502.0 Hz) |
| 20 | Lowest Frequency | (-245.9 Hz, -250.1 Hz) |
| 21 | Nucleus          | (1H, 1H)               |
| 22 | Acquired Size    | (1024, 64)             |
| 23 | Spectral Size    | (1024, 1024)           |

Table 9 HSQC experimental parameters of compound **3**

|    | Parameter         | Value (f2, f1)               |
|----|-------------------|------------------------------|
| 3  | Comment           | RG-77 CDCl <sub>3</sub> HSQC |
| 4  | Origin            | Bruker BioSpin GmbH          |
| 5  | Owner             | nmrsu                        |
| 6  | Site              |                              |
| 7  | Spectrometer      | spect                        |
| 8  | Author            |                              |
| 9  | Solvent           | CDCl <sub>3</sub>            |
| 10 | Temperature       | 296.1 K                      |
| 11 | Pulse Sequence    | hsqcedetgpsisp2.3            |
| 12 | Experiment        | 2D-HSQC-EDITED               |
| 13 | Number of Scans   | 8                            |
| 14 | Receiver Gain     | 185                          |
| 15 | Relaxation Delay  | 2.0000 sec                   |
| 16 | Pulse Width       | 12.0000 $\mu$ sec            |
| 17 | Acquisition Time  | 0.1278 sec                   |
| 18 | Acquisition Date  | 2014-08-29T08:07:22          |
| 19 | Modification Date | 2014-08-29T08:43:06          |
| 20 | Spectrometer      | (500.15 MHz, 125.76 MHz)     |
| 21 | Spectral Width    | (8012.8 Hz, 29683.1 Hz)      |
| 22 | Lowest Frequency  | (-505.4 Hz, -378.8 Hz)       |
| 23 | Nucleus           | (1H, 13C)                    |
| 24 | Acquired Size     | (1024, 125)                  |
| 25 | Spectral Size     | (1024, 512)                  |

Table 10 <sup>1</sup>H-<sup>1</sup>H COSY experimental parameters of compound **3**



|    | Parameter         | Value (f2, f1)               |
|----|-------------------|------------------------------|
| 1  | Comment           | RG-77 CDCl <sub>3</sub> COSY |
| 2  | Origin            | Bruker BioSpin GmbH          |
| 3  | Owner             | nmrsu                        |
| 4  | Site              |                              |
| 5  | Spectrometer      | spect                        |
| 6  | Author            |                              |
| 7  | Solvent           | CDCl <sub>3</sub>            |
| 8  | Temperature       | 295.5 K                      |
| 9  | Pulse Sequence    | cosygpppqf                   |
| 10 | Experiment        | 2D-COSY                      |
| 11 | Number of Scans   | 8                            |
| 12 | Receiver Gain     | 59                           |
| 13 | Relaxation Delay  | 2.0000 sec                   |
| 14 | Pulse Width       | 12.0000 $\mu$ sec            |
| 15 | Acquisition Time  | 0.1278 sec                   |
| 16 | Acquisition Date  | 2014-09-03T19:38:08          |
| 17 | Modification Date | 2014-09-03T20:15:02          |
| 18 | Spectrometer      | (500.15 MHz, 500.15 MHz)     |
| 19 | Spectral Width    | (8012.8 Hz, 8002.4 Hz)       |
| 20 | Lowest Frequency  | (-505.4 Hz, -500.2 Hz)       |
| 21 | Nucleus           | (1H, 1H)                     |
| 22 | Acquired Size     | (1024, 128)                  |
| 23 | Spectral Size     | (1024, 1024)                 |

Table 11 HMBC experimental parameters of compound **3**

|   | Parameter    | Value (f2, f1)               |
|---|--------------|------------------------------|
| 1 | Comment      | RG-77 CDCl <sub>3</sub> HMBC |
| 2 | Origin       | Bruker BioSpin GmbH          |
| 3 | Owner        | nmrsu                        |
| 4 | Site         |                              |
| 5 | Spectrometer | spect                        |
| 6 | Author       |                              |
| 7 | Solvent      | CDCl <sub>3</sub>            |
| 8 | Temperature  | 295.4 K                      |

|    |                   |                          |
|----|-------------------|--------------------------|
| 9  | Pulse Sequence    | hmbcgpndqf               |
| 10 | Experiment        | 2D-HMBC                  |
| 11 | Number of Scans   | 24                       |
| 12 | Receiver Gain     | 185                      |
| 13 | Relaxation Delay  | 1.5000 sec               |
| 14 | Pulse Width       | 12.0000 $\mu$ sec        |
| 15 | Acquisition Time  | 0.2731 sec               |
| 16 | Acquisition Date  | 2014-09-03T14:39:02      |
| 17 | Modification Date | 2014-09-03T15:27:14      |
| 18 | Spectrometer      | (500.15 MHz, 125.76 MHz) |
| 19 | Spectral Width    | (7500.0, 29683.0)        |
| 20 | Lowest Frequency  | (-249.0 Hz, -378.8 Hz)   |
| 21 | Nucleus           | (1H, 13C)                |
| 22 | Acquired Size     | (2048, 66)               |
| 23 | Spectral Size     | (2048, 512)              |

Table 12 ROESY experimental parameters of compound **3**

|    | Parameter        | Value (f2, f1)                |
|----|------------------|-------------------------------|
| 1  | Comment          | RG-77 CDCl <sub>3</sub> roesy |
| 2  | Origin           | Bruker BioSpin GmbH           |
| 3  | Owner            | nmrsu                         |
| 4  | Site             |                               |
| 5  | Spectrometer     | spect                         |
| 6  | Author           |                               |
| 7  | Solvent          | CDCl <sub>3</sub>             |
| 8  | Temperature      | 295.8 K                       |
| 9  | Pulse Sequence   | roesyhpp.2                    |
| 10 | Experiment       | 2D-ROESY                      |
| 11 | Number of Scans  | 24                            |
| 12 | Receiver Gain    | 59                            |
| 13 | Relaxation Delay | 2.0000 sec                    |
| 14 | Pulse Width      | 12.0000 $\mu$ sec             |
| 15 | Acquisition Time | 0.1278 sec                    |
| 16 | Acquisition Date | 2014-09-03T15:29:32           |

|    |                   |                          |
|----|-------------------|--------------------------|
| 17 | Modification Date | 2014-09-03T19:31:56      |
| 18 | Spectrometer      | (500.15 MHz, 500.15 MHz) |
| 19 | Spectral Width    | (8012.8 Hz, 8002.4 Hz)   |
| 20 | Lowest Frequency  | (-505.4 Hz, -500.2 Hz)   |
| 21 | Nucleus           | (1H, 1H)                 |
| 22 | Acquired Size     | (1024, 256)              |
| 23 | Spectral Size     | (1024, 1024)             |

Table 13 HSQC experimental parameters of compound 4

|    | Parameter         | Value (f2, f1)               |
|----|-------------------|------------------------------|
| 1  | Comment           | RG-80 CDCl <sub>3</sub> HSQC |
| 2  | Origin            | Bruker BioSpin GmbH          |
| 3  | Owner             | nmrsu                        |
| 4  | Site              |                              |
| 5  | Spectrometer      | spect                        |
| 6  | Author            |                              |
| 7  | Solvent           | CDCl <sub>3</sub>            |
| 8  | Temperature       | 296.1 K                      |
| 9  | Pulse Sequence    | hsqcedetgpsisp2.3            |
| 10 | Experiment        | 2D-HSQC-EDITED               |
| 11 | Number of Scans   | 4                            |
| 12 | Receiver Gain     | 185                          |
| 13 | Relaxation Delay  | 2.0000 sec                   |
| 14 | Pulse Width       | 12.0000 $\mu$ sec            |
| 15 | Acquisition Time  | 0.1577 sec                   |
| 16 | Acquisition Date  | 2014-09-12T13:43:50          |
| 17 | Modification Date | 2014-09-12T14:21:06          |
| 18 | Spectrometer      | (500.15 MHz, 125.76 MHz)     |
| 19 | Spectral Width    | (6493.5 Hz, 27670.6 Hz)      |
| 20 | Lowest Frequency  | (-245.9 Hz, -630.2 Hz)       |
| 21 | Nucleus           | (1H, 13C)                    |
| 22 | Acquired Size     | (1024, 256)                  |
| 23 | Spectral Size     | (1024, 1024)                 |

Table 14 <sup>1</sup>H-<sup>1</sup>H COSY experimental parameters of compound 4

|    | Parameter         | Value (f2, f1)               |
|----|-------------------|------------------------------|
| 1  | Comment           | RG-80 CDCl <sub>3</sub> COSY |
| 2  | Origin            | Bruker BioSpin GmbH          |
| 3  | Owner             | nmrsu                        |
| 4  | Site              |                              |
| 5  | Spectrometer      | spect                        |
| 6  | Author            |                              |
| 7  | Solvent           | CDCl <sub>3</sub>            |
| 8  | Temperature       | 295.5 K                      |
| 9  | Pulse Sequence    | cosygpppqf                   |
| 10 | Experiment        | 2D-COSY                      |
| 11 | Number of Scans   | 24                           |
| 12 | Receiver Gain     | 185                          |
| 13 | Relaxation Delay  | 2.0000 sec                   |
| 14 | Pulse Width       | 12.0000 $\mu$ sec            |
| 15 | Acquisition Time  | 0.1278 sec                   |
| 16 | Acquisition Date  | 2014-09-25T14:18:16          |
| 17 | Modification Date | 2014-09-25T15:56:58          |
| 18 | Spectrometer      | (500.15 MHz, 500.15 MHz)     |
| 19 | Spectral Width    | (8012.8 Hz, 8002.4 Hz)       |
| 20 | Lowest Frequency  | (-505.4 Hz, -500.2 Hz)       |
| 21 | Nucleus           | (1H, 1H)                     |
| 22 | Acquired Size     | (1024, 114)                  |
| 23 | Spectral Size     | (1024, 1024)                 |

Table 15 HMBC experimental parameters of compound 4

|   | Parameter | Value (f2, f1)               |
|---|-----------|------------------------------|
| 1 | Comment   | RG-80 CDCl <sub>3</sub> HMBC |
| 2 | Origin    | Bruker BioSpin GmbH          |

|    |                   |                          |
|----|-------------------|--------------------------|
| 3  | Owner             | nmrsu                    |
| 4  | Site              |                          |
| 5  | Spectrometer      | spect                    |
| 6  | Author            |                          |
| 7  | Solvent           | CDCl <sub>3</sub>        |
| 8  | Temperature       | 295.5 K                  |
| 9  | Pulse Sequence    | hmbcgpndqf               |
| 10 | Experiment        | 2D-HMBC                  |
| 11 | Number of Scans   | 48                       |
| 12 | Receiver Gain     | 185                      |
| 13 | Relaxation Delay  | 1.5000 sec               |
| 14 | Pulse Width       | 12.0000 $\mu$ sec        |
| 15 | Acquisition Time  | 0.2731 sec               |
| 16 | Acquisition Date  | 2014-09-25T11:31:18      |
| 17 | Modification Date | 2014-09-25T14:17:00      |
| 18 | Spectrometer      | (500.15 MHz, 125.76 MHz) |
| 19 | Spectral Width    | (7500.0 Hz, 29683.0 Hz)  |
| 20 | Lowest Frequency  | (-249.0 Hz, -378.8 Hz)   |
| 21 | Nucleus           | (1H, 13C)                |
| 22 | Acquired Size     | (2048, 113)              |
| 23 | Spectral Size     | (2048, 512)              |

Table 16 ROESY experimental parameters of compound **4**

|    | Parameter      | Value (f2, f1)                |
|----|----------------|-------------------------------|
| 1  | Comment        | RG-80 CDCl <sub>3</sub> roesy |
| 2  | Origin         | Bruker BioSpin GmbH           |
| 3  | Owner          | nmrsu                         |
| 4  | Site           |                               |
| 5  | Spectrometer   | spect                         |
| 6  | Author         |                               |
| 7  | Solvent        | CDCl <sub>3</sub>             |
| 8  | Temperature    | 295.6 K                       |
| 9  | Pulse Sequence | roesyhpp.2                    |
| 10 | Experiment     | 2D-ROESY                      |

|    |                   |                          |
|----|-------------------|--------------------------|
| 11 | Number of Scans   | 48                       |
| 12 | Receiver Gain     | 59                       |
| 13 | Relaxation Delay  | 2.0000 sec               |
| 14 | Pulse Width       | 12.0000 $\mu$ sec        |
| 15 | Acquisition Time  | 0.1278 sec               |
| 16 | Acquisition Date  | 2014-09-25T16:00:11      |
| 17 | Modification Date | 2014-09-25T21:55:58      |
| 18 | Spectrometer      | (500.15 MHz, 500.15 MHz) |
| 19 | Spectral Width    | (8012.8 Hz, 8002.4 Hz)   |
| 20 | Lowest Frequency  | (-505.4 Hz, -500.2 Hz)   |
| 21 | Nucleus           | (1H, 1H)                 |
| 22 | Acquired Size     | (1024, 188)              |
| 23 | Spectral Size     | (1024, 1024)             |

Table 17 HSQC experimental parameters of compound **5**

|    | Parameter         | Value (f2, f1)               |
|----|-------------------|------------------------------|
| 1  | Comment           | RG-69 CDCl <sub>3</sub> HSQC |
| 2  | Origin            | Bruker BioSpin GmbH          |
| 3  | Owner             | nmrsu                        |
| 4  | Site              |                              |
| 5  | Spectrometer      | spect                        |
| 6  | Author            |                              |
| 7  | Solvent           | CDCl <sub>3</sub>            |
| 8  | Temperature       | 294.7 K                      |
| 9  | Pulse Sequence    | hsqcedetgpsisp2.3            |
| 10 | Experiment        | 2D-HSQC-EDITED               |
| 11 | Number of Scans   | 4                            |
| 12 | Receiver Gain     | 185                          |
| 13 | Relaxation Delay  | 2.0000 sec                   |
| 14 | Pulse Width       | 12.0000 $\mu$ sec            |
| 15 | Acquisition Time  | 0.1462 sec                   |
| 16 | Acquisition Date  | 2013-12-12T12:17:59          |
| 17 | Modification Date | 2013-12-12T12:27:48          |
| 18 | Spectrometer      | (500.15 MHz, 125.76 MHz)     |

|    |                  |                                    |
|----|------------------|------------------------------------|
| 19 | Spectral Width   | (7002.8 Hz, 27670.4 Hz)            |
| 20 | Lowest Frequency | (-250.4 Hz, -630.1 Hz)             |
| 21 | Nucleus          | ( <sup>1</sup> H, <sup>13</sup> C) |
| 22 | Acquired Size    | (1024, 68)                         |
| 23 | Spectral Size    | (1024, 512)                        |

Table 18 <sup>1</sup>H-<sup>1</sup>H COSY experimental parameters of compound **5**

|    | Parameter         | Value (f2, f1)                    |
|----|-------------------|-----------------------------------|
| 1  | Comment           | RG-69 CDCl <sub>3</sub> COSY      |
| 2  | Origin            | Bruker BioSpin GmbH               |
| 3  | Owner             | nmrsu                             |
| 4  | Site              |                                   |
| 5  | Spectrometer      | spect                             |
| 6  | Author            |                                   |
| 7  | Solvent           | CDCl <sub>3</sub>                 |
| 8  | Temperature       | 293.7 K                           |
| 9  | Pulse Sequence    | cosygpppqf                        |
| 10 | Experiment        | 2D-COSY                           |
| 11 | Number of Scans   | 4                                 |
| 12 | Receiver Gain     | 59                                |
| 13 | Relaxation Delay  | 2.0000 sec                        |
| 14 | Pulse Width       | 12.0000 $\mu$ sec                 |
| 15 | Acquisition Time  | 0.1532 sec                        |
| 16 | Acquisition Date  | 2014-01-02T17:03:07               |
| 17 | Modification Date | 2014-01-02T17:21:48               |
| 18 | Spectrometer      | (500.15 MHz, 500.15 MHz)          |
| 19 | Spectral Width    | (6684.5 Hz, 6684.5 Hz)            |
| 20 | Lowest Frequency  | (-335.2 Hz, -335.2 Hz)            |
| 21 | Nucleus           | ( <sup>1</sup> H, <sup>1</sup> H) |
| 22 | Acquired Size     | (1024, 128)                       |
| 23 | Spectral Size     | (1024, 1024)                      |

Table 19 HMBC experimental parameters of compound 5

|    | Parameter         | Value (f2, f1)               |
|----|-------------------|------------------------------|
| 1  | Comment           | RG-69 CDCl <sub>3</sub> HMBC |
| 2  | Origin            | Bruker BioSpin GmbH          |
| 3  | Owner             | nmrsu                        |
| 4  | Site              |                              |
| 5  | Spectrometer      | spect                        |
| 6  | Author            |                              |
| 7  | Solvent           | CDCl <sub>3</sub>            |
| 8  | Temperature       | 293.8 K                      |
| 9  | Pulse Sequence    | hmbcgpndqf                   |
| 10 | Experiment        | 2D-HMBC                      |
| 11 | Number of Scans   | 8                            |
| 12 | Receiver Gain     | 185                          |
| 13 | Relaxation Delay  | 1.5000 sec                   |
| 14 | Pulse Width       | 12.0000 $\mu$ sec            |
| 15 | Acquisition Time  | 0.3072 sec                   |
| 16 | Acquisition Date  | 2014-01-02T16:47:11          |
| 17 | Modification Date | 2014-01-02T17:02:34          |
| 18 | Spectrometer      | (500.15 MHz, 125.76 MHz)     |
| 19 | Spectral Width    | (6666.7 Hz, 29683.0 Hz)      |
| 20 | Lowest Frequency  | (-326.3 Hz, -378.8Hz)        |
| 21 | Nucleus           | (1H, 13C)                    |
| 22 | Acquired Size     | (2048, 62)                   |
| 23 | Spectral Size     | (2048, 256)                  |

Table 20 ROESY experimental parameters of compound 5

|   | Parameter | Value (f2, f1)                |
|---|-----------|-------------------------------|
| 1 | Comment   | RG-69 CDCl <sub>3</sub> roesy |
| 2 | Origin    | Bruker BioSpin GmbH           |
| 3 | Owner     | nmrsu                         |
| 4 | Site      |                               |



|    |                   |                          |
|----|-------------------|--------------------------|
| 5  | Spectrometer      | spect                    |
| 6  | Author            |                          |
| 7  | Solvent           | CDCl <sub>3</sub>        |
| 8  | Temperature       | 293.7 K                  |
| 9  | Pulse Sequence    | roesyphpp.2              |
| 10 | Experiment        | 2D-ROESY                 |
| 11 | Number of Scans   | 24                       |
| 12 | Receiver Gain     | 59                       |
| 13 | Relaxation Delay  | 2.0000 sec               |
| 14 | Pulse Width       | 12.0000 $\mu$ sec        |
| 15 | Acquisition Time  | 0.1577 sec               |
| 16 | Acquisition Date  | 2014-01-02T17:24:07      |
| 17 | Modification Date | 2014-01-02T19:16:14      |
| 18 | Spectrometer      | (500.15 MHz, 500.15 MHz) |
| 19 | Spectral Width    | (6493.5 Hz, 6502.0 Hz)   |
| 20 | Lowest Frequency  | (-245.9 Hz, -250.1 Hz)   |
| 21 | Nucleus           | (1H, 1H)                 |
| 22 | Acquired Size     | (1024, 117)              |
| 23 | Spectral Size     | (1024, 1024)             |

Table 21 HSQC experimental parameters of compound 6

|    | Parameter        | Value (f2, f1)               |
|----|------------------|------------------------------|
| 1  | Comment          | RG-92 CDCl <sub>3</sub> HSQC |
| 2  | Origin           | Bruker BioSpin GmbH          |
| 3  | Owner            | nmrsu                        |
| 4  | Site             |                              |
| 5  | Spectrometer     | spect                        |
| 6  | Author           |                              |
| 7  | Solvent          | CDCl <sub>3</sub>            |
| 8  | Temperature      | 296.5 K                      |
| 9  | Pulse Sequence   | hsqcedetgpsisp2.3            |
| 10 | Experiment       | 2D-HSQC-EDITED               |
| 11 | Number of Scans  | 8                            |
| 12 | Receiver Gain    | 185                          |
| 13 | Relaxation Delay | 2.0000 sec                   |

|    |                   |                          |
|----|-------------------|--------------------------|
| 14 | Pulse Width       | 12.0000 $\mu$ sec        |
| 15 | Acquisition Time  | 0.1278 sec               |
| 16 | Acquisition Date  | 2014-10-17T10:24:57      |
| 17 | Modification Date | 2014-10-17T10:47:13      |
| 18 | Spectrometer      | (500.15 MHz, 125.76 MHz) |
| 19 | Spectral Width    | (8012.8 Hz, 29683.1Hz)   |
| 20 | Lowest Frequency  | (-505.4 Hz, -378.8 Hz)   |
| 21 | Nucleus           | (1H, 13C)                |
| 22 | Acquired Size     | (1024, 78)               |
| 23 | Spectral Size     | (1024, 512)              |

Table 22  $^1\text{H}$ - $^1\text{H}$  COSY experimental parameters of compound **6**

|    | Parameter         | Value (f2, f1)               |
|----|-------------------|------------------------------|
| 1  | Comment           | RG-92 CDCl <sub>3</sub> COSY |
| 2  | Origin            | Bruker BioSpin GmbH          |
| 3  | Owner             | nmrsu                        |
| 4  | Site              |                              |
| 5  | Spectrometer      | spect                        |
| 6  | Author            |                              |
| 7  | Solvent           | CDCl <sub>3</sub>            |
| 8  | Temperature       | 294.8 K                      |
| 9  | Pulse Sequence    | cosygpppqf                   |
| 10 | Experiment        | 2D-COSY                      |
| 11 | Number of Scans   | 20                           |
| 12 | Receiver Gain     | 59                           |
| 13 | Relaxation Delay  | 2.0000 sec                   |
| 14 | Pulse Width       | 12.0000 $\mu$ sec            |
| 15 | Acquisition Time  | 0.1278 sec                   |
| 16 | Acquisition Date  | 2015-01-17T01:13:00          |
| 17 | Modification Date | 2015-01-17T02:45:14          |
| 18 | Spectrometer      | (500.15 MHz, 500.15 MHz)     |
| 19 | Spectral Width    | (8012.8 Hz, 8002.4Hz)        |
| 20 | Lowest Frequency  | (-505.4 Hz, -500.2 Hz)       |
| 21 | Nucleus           | (1H, 1H)                     |

|    |               |              |
|----|---------------|--------------|
| 22 | Acquired Size | (1024, 128)  |
| 23 | Spectral Size | (1024, 1024) |

Table 23 HMBC experimental parameters of compound **6**

|    | Parameter         | Value (f2, f1)               |
|----|-------------------|------------------------------|
| 1  | Comment           | RG-92 CDCl <sub>3</sub> HMBC |
| 2  | Origin            | Bruker BioSpin GmbH          |
| 3  | Owner             | nmrsu                        |
| 4  | Site              |                              |
| 5  | Spectrometer      | spect                        |
| 6  | Author            |                              |
| 7  | Solvent           | CDCl <sub>3</sub>            |
| 8  | Temperature       | 294.5 K                      |
| 9  | Pulse Sequence    | hmbcgpndqf                   |
| 10 | Experiment        | 2D-HMBC                      |
| 11 | Number of Scans   | 56                           |
| 12 | Receiver Gain     | 185                          |
| 13 | Relaxation Delay  | 1.5000 sec                   |
| 14 | Pulse Width       | 12.0000 $\mu$ sec            |
| 15 | Acquisition Time  | 0.2731 sec                   |
| 16 | Acquisition Date  | 2015-01-16T21:33:11          |
| 17 | Modification Date | 2015-01-17T01:11:52          |
| 18 | Spectrometer      | (500.15 MHz, 125.76 MHz)     |
| 19 | Spectral Width    | (7500.0 Hz, 29683.0 Hz)      |
| 20 | Lowest Frequency  | (-249.0 Hz, -378.8 Hz)       |
| 21 | Nucleus           | (1H, 13C)                    |
| 22 | Acquired Size     | (2048, 128)                  |
| 23 | Spectral Size     | (2048, 512)                  |

Table 24 ROESY experimental parameters of compound **6**

|   | Parameter | Value (f2, f1)                |
|---|-----------|-------------------------------|
| 1 | Comment   | RG-92 CDCl <sub>3</sub> roesy |
| 2 | Origin    | Bruker BioSpin GmbH           |
| 3 | Owner     | nmrsu                         |

|    |                   |                          |
|----|-------------------|--------------------------|
| 4  | Site              |                          |
| 5  | Spectrometer      | spect                    |
| 6  | Author            |                          |
| 7  | Solvent           | CDCl <sub>3</sub>        |
| 8  | Temperature       | 294.9 K                  |
| 9  | Pulse Sequence    | roesyphpp.2              |
| 10 | Experiment        | 2D-ROESY                 |
| 11 | Number of Scans   | 48                       |
| 12 | Receiver Gain     | 59                       |
| 13 | Relaxation Delay  | 2.0000 sec               |
| 14 | Pulse Width       | 12.0000 $\mu$ sec        |
| 15 | Acquisition Time  | 0.1278 sec               |
| 16 | Acquisition Date  | 2015-01-17T02:48:27      |
| 17 | Modification Date | 2015-01-17T10:08:39      |
| 18 | Spectrometer      | (500.15 MHz, 500.15 MHz) |
| 19 | Spectral Width    | (8012.8 Hz, 8002.4 Hz)   |
| 20 | Lowest Frequency  | (-505.4 Hz, -500.2 Hz)   |
| 21 | Nucleus           | (1H, 1H)                 |
| 22 | Acquired Size     | (1024, 232)              |
| 23 | Spectral Size     | (1024, 1024)             |

Table 25 HSQC experimental parameters of compound 7

|    | Parameter       | Value (f2, f1)               |
|----|-----------------|------------------------------|
| 1  | Comment         | RG-95 CDCl <sub>3</sub> HSQC |
| 2  | Origin          | Bruker BioSpin GmbH          |
| 3  | Owner           | nmrsu                        |
| 4  | Site            |                              |
| 5  | Spectrometer    | spect                        |
| 6  | Author          |                              |
| 7  | Solvent         | CDCl <sub>3</sub>            |
| 8  | Temperature     | 295.7 K                      |
| 9  | Pulse Sequence  | hsqcedetgpsisp2.3            |
| 10 | Experiment      | 2D-HSQC-EDITED               |
| 11 | Number of Scans | 8                            |

|    |                   |                          |
|----|-------------------|--------------------------|
| 12 | Receiver Gain     | 185                      |
| 13 | Relaxation Delay  | 2.0000 sec               |
| 14 | Pulse Width       | 12.0000 $\mu$ sec        |
| 15 | Acquisition Time  | 0.1278 sec               |
| 16 | Acquisition Date  | 2014-11-05T09:04:11      |
| 17 | Modification Date | 2014-11-05T09:25:53      |
| 18 | Spectrometer      | (500.15 MHz, 125.76 MHz) |
| 19 | Spectral Width    | (8012.8 Hz, 29683.1 Hz)  |
| 20 | Lowest Frequency  | (-505.4 Hz, -378.8 Hz)   |
| 21 | Nucleus           | (1H, 13C)                |
| 22 | Acquired Size     | (1024, 76)               |
| 23 | Spectral Size     | (1024, 512)              |

Table 26  $^1\text{H}$ - $^1\text{H}$  COSY experimental parameters of compound **7**

|    | Parameter         | Value (f2, f1)               |
|----|-------------------|------------------------------|
| 1  | Comment           | RG-95 CDCl <sub>3</sub> COSY |
| 2  | Origin            | Bruker BioSpin GmbH          |
| 3  | Owner             | nmrsu                        |
| 4  | Site              |                              |
| 5  | Spectrometer      | spect                        |
| 6  | Author            |                              |
| 7  | Solvent           | CDCl <sub>3</sub>            |
| 8  | Temperature       | 294.4 K                      |
| 9  | Pulse Sequence    | cosygpppqf                   |
| 10 | Experiment        | 2D-COSY                      |
| 11 | Number of Scans   | 12                           |
| 12 | Receiver Gain     | 59                           |
| 13 | Relaxation Delay  | 2.0000 sec                   |
| 14 | Pulse Width       | 12.0000 $\mu$ sec            |
| 15 | Acquisition Time  | 0.1278 sec                   |
| 16 | Acquisition Date  | 2015-01-15T00:50:50          |
| 17 | Modification Date | 2015-01-15T01:46:11          |
| 18 | Spectrometer      | (500.15 MHz, 500.15 MHz)     |
| 19 | Spectral Width    | (8012.8 Hz, 8002.4Hz)        |
| 20 | Lowest Frequency  | (-505.4 Hz, -500.2 Hz)       |

|    |               |              |
|----|---------------|--------------|
| 21 | Nucleus       | (1H, 1H)     |
| 22 | Acquired Size | (1024, 128)  |
| 23 | Spectral Size | (1024, 1024) |

Table 27 HMBC experimental parameters of compound 7

|    | Parameter         | Value (f2, f1)               |
|----|-------------------|------------------------------|
| 1  | Comment           | RG-95 CDCl <sub>3</sub> HMBC |
| 2  | Origin            | Bruker BioSpin GmbH          |
| 3  | Owner             | nmrsu                        |
| 4  | Site              |                              |
| 5  | Spectrometer      | spect                        |
| 6  | Author            |                              |
| 7  | Solvent           | CDCl <sub>3</sub>            |
| 8  | Temperature       | 294.5 K                      |
| 9  | Pulse Sequence    | hmbcgpndqf                   |
| 10 | Experiment        | 2D-HMBC                      |
| 11 | Number of Scans   | 36                           |
| 12 | Receiver Gain     | 185                          |
| 13 | Relaxation Delay  | 1.5000 sec                   |
| 14 | Pulse Width       | 12.0000 $\mu$ sec            |
| 15 | Acquisition Time  | 0.2731 sec                   |
| 16 | Acquisition Date  | 2015-01-14T22:29:24          |
| 17 | Modification Date | 2015-01-15T00:50:00          |
| 18 | Spectrometer      | (500.15 MHz, 125.76 MHz)     |
| 19 | Spectral Width    | (7500.0 Hz, 29683.0 Hz)      |
| 20 | Lowest Frequency  | (-249.0 Hz, -378.8 Hz)       |
| 21 | Nucleus           | (1H, 13C)                    |
| 22 | Acquired Size     | (2048, 128)                  |
| 23 | Spectral Size     | (2048, 512)                  |

Table 28 ROESY experimental parameters of compound 7

|   | Parameter | Value (f2, f1)                |
|---|-----------|-------------------------------|
| 1 | Comment   | RG-95 CDCl <sub>3</sub> roesy |
| 2 | Origin    | Bruker BioSpin GmbH           |
| 3 | Owner     | nmrsu                         |
| 4 | Site      |                               |

|    |                   |                          |
|----|-------------------|--------------------------|
| 5  | Spectrometer      | spect                    |
| 6  | Author            |                          |
| 7  | Solvent           | CDCl <sub>3</sub>        |
| 8  | Temperature       | 294.4 K                  |
| 9  | Pulse Sequence    | roesyphpp.2              |
| 10 | Experiment        | 2D-ROESY                 |
| 11 | Number of Scans   | 32                       |
| 12 | Receiver Gain     | 59                       |
| 13 | Relaxation Delay  | 2.0000 sec               |
| 14 | Pulse Width       | 12.0000 $\mu$ sec        |
| 15 | Acquisition Time  | 0.1278 sec               |
| 16 | Acquisition Date  | 2015-01-15T01:48:46      |
| 17 | Modification Date | 2015-01-15T07:11:57      |
| 18 | Spectrometer      | (500.15 MHz, 500.15 MHz) |
| 19 | Spectral Width    | (8012.8 Hz, 8002.4 Hz)   |
| 20 | Lowest Frequency  | (-505.4 Hz, -500.2 Hz)   |
| 21 | Nucleus           | (1H, 1H)                 |
| 22 | Acquired Size     | (1024, 256)              |
| 23 | Spectral Size     | (1024, 1024)             |

Table 29 HSQC experimental parameters of compound **9**

|    | Parameter        | Value (f2, f1)               |
|----|------------------|------------------------------|
| 1  | Comment          | RG-89 CDCl <sub>3</sub> HSQC |
| 2  | Origin           | Bruker BioSpin GmbH          |
| 3  | Owner            | nmrsu                        |
| 4  | Site             |                              |
| 5  | Spectrometer     | spect                        |
| 6  | Author           |                              |
| 7  | Solvent          | CDCl <sub>3</sub>            |
| 8  | Temperature      | 295.9 K                      |
| 9  | Pulse Sequence   | hsqcedetgpsisp2.3            |
| 10 | Experiment       | 2D-HSQC-EDITED               |
| 11 | Number of Scans  | 8                            |
| 12 | Receiver Gain    | 185                          |
| 13 | Relaxation Delay | 2.0000 sec                   |

|    |                   |                                    |
|----|-------------------|------------------------------------|
| 14 | Pulse Width       | 12.0000 $\mu$ sec                  |
| 15 | Acquisition Time  | 0.1278 sec                         |
| 16 | Acquisition Date  | 2014-10-17T08:20:06                |
| 17 | Modification Date | 2014-10-17T08:40:53                |
| 18 | Spectrometer      | (500.15 MHz, 125.76 MHz)           |
| 19 | Spectral Width    | (8012.8 Hz, 29683.1 Hz)            |
| 20 | Lowest Frequency  | (-505.4 Hz, -378.8 Hz)             |
| 21 | Nucleus           | ( <sup>1</sup> H, <sup>13</sup> C) |
| 22 | Acquired Size     | (1024, 73)                         |
| 23 | Spectral Size     | (1024, 512)                        |

Table 30 <sup>1</sup>H-<sup>1</sup>H COSY experimental parameters of compound **9**

|    | Parameter         | Value (f2, f1)                    |
|----|-------------------|-----------------------------------|
| 1  | Comment           | RG-89 CDCl <sub>3</sub> COSY      |
| 2  | Origin            | Bruker BioSpin GmbH               |
| 3  | Owner             | nmrsu                             |
| 4  | Site              |                                   |
| 5  | Spectrometer      | spect                             |
| 6  | Author            |                                   |
| 7  | Solvent           | CDCl <sub>3</sub>                 |
| 8  | Temperature       | 294.2                             |
| 9  | Pulse Sequence    | cosygpppqf                        |
| 10 | Experiment        | 2D-COSY                           |
| 11 | Number of Scans   | 12                                |
| 12 | Receiver Gain     | 59                                |
| 13 | Relaxation Delay  | 2.0000 sec                        |
| 14 | Pulse Width       | 14.3200 $\mu$ sec                 |
| 15 | Acquisition Time  | 0.2560 sec                        |
| 16 | Acquisition Date  | 2015-04-10T00:27:37               |
| 17 | Modification Date | 2015-04-10T02:26:31               |
| 18 | Spectrometer      | (500.15 MHz, 500.15 MHz)          |
| 19 | Spectral Width    | (4000.0 Hz, 4001.2 Hz)            |
| 20 | Lowest Frequency  | (0.6 Hz, 0.0 Hz)                  |
| 21 | Nucleus           | ( <sup>1</sup> H, <sup>1</sup> H) |
| 22 | Acquired Size     | (1024, 256)                       |
| 23 | Spectral Size     | (1024, 1024)                      |



Table 31 HMBC experimental parameters of compound **9**

|    | Parameter         | Value (f2, f1)               |
|----|-------------------|------------------------------|
| 1  | Comment           | RG-89 CDCl <sub>3</sub> HMBC |
| 2  | Origin            | Bruker BioSpin GmbH          |
| 3  | Owner             | nmrsu                        |
| 4  | Site              |                              |
| 5  | Spectrometer      | spect                        |
| 6  | Author            |                              |
| 7  | Solvent           | CDCl <sub>3</sub>            |
| 8  | Temperature       | 294.2 K                      |
| 9  | Pulse Sequence    | hmbcgpndqf                   |
| 10 | Experiment        | 2D-HMBC                      |
| 11 | Number of Scans   | 32                           |
| 12 | Receiver Gain     | 185                          |
| 13 | Relaxation Delay  | 1.5000 sec                   |
| 14 | Pulse Width       | 14.3200 $\mu$ sec            |
| 15 | Acquisition Time  | 0.5120 sec                   |
| 16 | Acquisition Date  | 2015-04-09T22:05:11          |
| 17 | Modification Date | 2015-04-10T00:26:23          |
| 18 | Spectrometer      | (500.15 MHz, 125.76 MHz)     |
| 19 | Spectral Width    | (4000.0 Hz, 22639.9 Hz)      |
| 20 | Lowest Frequency  | (0.6 Hz, 627.5 Hz)           |
| 21 | Nucleus           | (1H, 13C)                    |
| 22 | Acquired Size     | (2048, 128)                  |
| 23 | Spectral Size     | (2048, 512)                  |

Table 32 ROESY experimental parameters of compound **9**

|   | Parameter    | Value (f2, f1)                |
|---|--------------|-------------------------------|
| 1 | Comment      | RG-89 CDCl <sub>3</sub> roesy |
| 2 | Origin       | Bruker BioSpin GmbH           |
| 3 | Owner        | nmrsu                         |
| 4 | Site         |                               |
| 5 | Spectrometer | spect                         |

|    |                   |                          |
|----|-------------------|--------------------------|
| 6  | Author            |                          |
| 7  | Solvent           | CDCl <sub>3</sub>        |
| 8  | Temperature       | 294.3 K                  |
| 9  | Pulse Sequence    | roesyphpp.2              |
| 10 | Experiment        | 2D-ROESY                 |
| 11 | Number of Scans   | 32                       |
| 12 | Receiver Gain     | 59                       |
| 13 | Relaxation Delay  | 2.0000 sec               |
| 14 | Pulse Width       | 14.3200 $\mu$ sec        |
| 15 | Acquisition Time  | 0.2560 sec               |
| 16 | Acquisition Date  | 2015-04-10T02:29:19      |
| 17 | Modification Date | 2015-04-10T07:58:06      |
| 18 | Spectrometer      | (500.15 MHz, 500.15 MHz) |
| 19 | Spectral Width    | (4000.0 Hz, 4001.2 Hz)   |
| 20 | Lowest Frequency  | (0.6 Hz, 0.0 Hz)         |
| 21 | Nucleus           | (1H, 1H)                 |
| 22 | Acquired Size     | (1024, 246)              |
| 23 | Spectral Size     | (1024, 1024)             |

Table 33 HSQC experimental parameters of compound **10**

|    | Parameter        | Value (f2, f1)               |
|----|------------------|------------------------------|
| 1  | Comment          | RG-40 CDCl <sub>3</sub> HSQC |
| 2  | Origin           | Bruker BioSpin GmbH          |
| 3  | Owner            | nmrsu                        |
| 4  | Site             |                              |
| 5  | Spectrometer     | spect                        |
| 6  | Author           |                              |
| 7  | Solvent          | CDCl <sub>3</sub>            |
| 8  | Temperature      | 296.5 K                      |
| 9  | Pulse Sequence   | hsqcedetgpsisp2.3            |
| 10 | Experiment       | 2D-HSQC-EDITED               |
| 11 | Number of Scans  | 4                            |
| 12 | Receiver Gain    | 185                          |
| 13 | Relaxation Delay | 2.0000 sec                   |
| 14 | Pulse Width      | 12.0000 $\mu$ sec            |

|    |                   |                          |
|----|-------------------|--------------------------|
| 15 | Acquisition Time  | 0.1462 sec               |
| 16 | Acquisition Date  | 2013-08-19T16:40:42      |
| 17 | Modification Date | 2013-08-19T17:06:36      |
| 18 | Spectrometer      | (500.15 MHz, 125.76 MHz) |
| 19 | Spectral Width    | (7002.8 Hz, 27670.4 Hz)  |
| 20 | Lowest            | (-250.4 Hz, -630.1 Hz)   |
| 21 | Nucleus           | (1H, 13C)                |
| 22 | Acquired Size     | (1024, 114)              |
| 23 | Spectral Size     | (1024, 512)              |

Table 34 <sup>1</sup>H-<sup>1</sup>H COSY experimental parameters of compound **10**

|    | Parameter         | Value (f2, f1)               |
|----|-------------------|------------------------------|
| 1  | Comment           | RG-40 CDCl <sub>3</sub> COSY |
| 2  | Origin            | Bruker BioSpin GmbH          |
| 3  | Owner             | nmrsu                        |
| 4  | Site              |                              |
| 5  | Spectrometer      | spect                        |
| 6  | Author            |                              |
| 7  | Solvent           | CDCl <sub>3</sub>            |
| 8  | Temperature       | 295.6 K                      |
| 9  | Pulse Sequence    | cosygpppqf                   |
| 10 | Experiment        | 2D-COSY                      |
| 11 | Number of Scans   | 4                            |
| 12 | Receiver Gain     | 59                           |
| 13 | Relaxation Delay  | 2.0000 sec                   |
| 14 | Pulse Width       | 12.0000 $\mu$ sec            |
| 15 | Acquisition Time  | 0.1532 sec                   |
| 16 | Acquisition Date  | 2013-10-09T15:06:08          |
| 17 | Modification Date | 2013-10-09T15:24:50          |
| 18 | Spectrometer      | (500.15 MHz, 500.15 MHz)     |
| 19 | Spectral Width    | (6684.5 Hz, 6684.5 Hz)       |
| 20 | Lowest Frequency  | (-335.2 Hz, -335.2 Hz)       |
| 21 | Nucleus           | (1H, 1H)                     |
| 22 | Acquired Size     | (1024, 128)                  |
| 23 | Spectral Size     | (1024, 1024)                 |

Table 35 HMBC experimental parameters of compound **10**

|    | Parameter         | Value (f2, f1)                     |
|----|-------------------|------------------------------------|
| 1  | Comment           | RG-40 CDCl <sub>3</sub> HMBC       |
| 2  | Origin            | Bruker BioSpin GmbH                |
| 3  | Owner             | nmrsu                              |
| 4  | Site              |                                    |
| 5  | Spectrometer      | spect                              |
| 6  | Author            |                                    |
| 7  | Solvent           | CDCl <sub>3</sub>                  |
| 8  | Temperature       | 295.8 K                            |
| 9  | Pulse Sequence    | hmbcgpndqf                         |
| 10 | Experiment        | 2D-HMBC                            |
| 11 | Number of Scans   | 16                                 |
| 12 | Receiver Gain     | 185                                |
| 13 | Relaxation Delay  | 1.5000 sec                         |
| 14 | Pulse Width       | 12.0000 $\mu$ sec                  |
| 15 | Acquisition Time  | 0.3072 sec                         |
| 16 | Acquisition Date  | 2013-10-09T14:34:22                |
| 17 | Modification Date | 2013-10-09T15:05:36                |
| 18 | Spectrometer      | (500.15 MHz, 125.76 MHz)           |
| 19 | Spectral Width    | (6666.7 Hz, 29683.0 Hz)            |
| 20 | Lowest Frequency  | (-326.3 Hz, -378.8 Hz)             |
| 21 | Nucleus           | ( <sup>1</sup> H, <sup>13</sup> C) |
| 22 | Acquired Size     | (2048, 63)                         |
| 23 | Spectral Size     | (2048, 256)                        |

Table 36 ROESY experimental parameters of compound **10**

|   | Parameter | Value (f2, f1)                |
|---|-----------|-------------------------------|
| 1 | Comment   | RG-40 CDCl <sub>3</sub> roesy |
| 2 | Origin    | Bruker BioSpin GmbH           |
| 3 | Owner     | nmrsu                         |
| 4 | Site      |                               |

|    |                   |                          |
|----|-------------------|--------------------------|
| 5  | Spectrometer      | spect                    |
| 6  | Author            |                          |
| 7  | Solvent           | CDCl <sub>3</sub>        |
| 8  | Temperature       | 295.6 K                  |
| 9  | Pulse Sequence    | roesyphpp.2              |
| 10 | Experiment        | 2D-ROESY                 |
| 11 | Number of Scans   | 24                       |
| 12 | Receiver Gain     | 59                       |
| 13 | Relaxation Delay  | 2.0000 sec               |
| 14 | Pulse Width       | 12.0000 $\mu$ sec        |
| 15 | Acquisition Time  | 0.1577 sec               |
| 16 | Acquisition Date  | 2013-10-09T15:27:08      |
| 17 | Modification Date | 2013-10-09T16:31:04      |
| 18 | Spectrometer      | (500.15 MHz, 500.15 MHz) |
| 19 | Spectral Width    | (6493.5 Hz, 6502.0 Hz)   |
| 20 | Lowest Frequency  | (-245.9 Hz, -250.1 Hz)   |
| 21 | Nucleus           | (1H, 1H)                 |
| 22 | Acquired Size     | (1024, 67)               |
| 23 | Spectral Size     | (1024, 1024)             |

Table 37 HSQC experimental parameters of compound **11**

|    | Parameter        | Value (f2, f1)               |
|----|------------------|------------------------------|
| 1  | Comment          | RG-66 CDCl <sub>3</sub> HSQC |
| 2  | Origin           | Bruker BioSpin GmbH          |
| 3  | Owner            | nmrsu                        |
| 4  | Site             |                              |
| 5  | Spectrometer     | spect                        |
| 6  | Author           |                              |
| 7  | Solvent          | CDCl <sub>3</sub>            |
| 8  | Temperature      | 0.0 K                        |
| 9  | Pulse Sequence   | hsqcedetgpsisp2.3            |
| 10 | Experiment       | 2D-HSQC-EDITED               |
| 11 | Number of Scans  | 4                            |
| 12 | Receiver Gain    | 185                          |
| 13 | Relaxation Delay | 2.0000 sec                   |

|    |                   |                          |
|----|-------------------|--------------------------|
| 14 | Pulse Width       | 12.0000 $\mu$ sec        |
| 15 | Acquisition Time  | 0.1462 sec               |
| 16 | Acquisition Date  | 2013-11-26T16:39:31      |
| 17 | Modification Date | 2013-11-26T16:52:12      |
| 18 | Spectrometer      | (500.15 MHz, 125.76 MHz) |
| 19 | Spectral Width    | (7002.8 Hz, 27670.4 Hz)  |
| 20 | Lowest Frequency  | (-250.4 Hz, -630.1 Hz)   |
| 21 | Nucleus           | (1H, 13C)                |
| 22 | Acquired Size     | (1024, 88)               |
| 23 | Spectral Size     | (1024, 512)              |

Table 38  $^1\text{H}$ - $^1\text{H}$  COSY experimental parameters of compound **11**

|    | Parameter         | Value (f2, f1)               |
|----|-------------------|------------------------------|
| 1  | Comment           | RG-66 CDCl <sub>3</sub> COSY |
| 2  | Origin            | Bruker BioSpin GmbH          |
| 3  | Owner             | nmrsu                        |
| 4  | Site              |                              |
| 5  | Spectrometer      | spect                        |
| 6  | Author            |                              |
| 7  | Solvent           | CDCl <sub>3</sub>            |
| 8  | Temperature       | 293.4 K                      |
| 9  | Pulse Sequence    | cosygpppqf                   |
| 10 | Experiment        | 2D-COSY                      |
| 11 | Number of Scans   | 4                            |
| 12 | Receiver Gain     | 59                           |
| 13 | Relaxation Delay  | 2.0000 sec                   |
| 14 | Pulse Width       | 12.0000 $\mu$ sec            |
| 15 | Acquisition Time  | 0.1532 sec                   |
| 16 | Acquisition Date  | 2014-01-04T15:27:11          |
| 17 | Modification Date | 2014-01-04T15:45:52          |
| 18 | Spectrometer      | (500.15 MHz, 500.15 MHz)     |
| 19 | Spectral Width    | (6684.5 Hz, 6684.5 Hz)       |
| 20 | Lowest Frequency  | (-335.2 Hz, -335.2 Hz)       |
| 21 | Nucleus           | (1H, 1H)                     |
| 22 | Acquired Size     | (1024, 128)                  |

|    |               |              |
|----|---------------|--------------|
| 23 | Spectral Size | (1024, 1024) |
|----|---------------|--------------|

Table 39 HMBC experimental parameters of compound **11**

|    | Parameter        | Value (f2, f1)                     |
|----|------------------|------------------------------------|
| 3  | Comment          | RG-66 CDCl <sub>3</sub> HMBC       |
| 4  | Origin           | Bruker BioSpin GmbH                |
| 5  | Owner            | nmrsu                              |
| 6  | Site             |                                    |
| 7  | Spectrometer     | spect                              |
| 8  | Author           |                                    |
| 9  | Solvent          | CDCl <sub>3</sub>                  |
| 10 | Temperature      | 293.5 K                            |
| 11 | Pulse Sequence   | hmbcgpndqf                         |
| 12 | Experiment       | 2D-HMBC                            |
| 13 | Number of Scans  | 8                                  |
| 14 | Receiver Gain    | 185                                |
| 15 | Relaxation Delay | 1.5000 sec                         |
| 16 | Pulse Width      | 12.0000 $\mu$ sec                  |
| 17 | Acquisition Time | 0.3072 sec                         |
| 18 | Acquisition Date | 2014-01-04T14:54:47                |
| 19 | Modification     | 2014-01-04T15:26:38                |
| 20 | Spectrometer     | (500.15 MHz, 125.76 MHz)           |
| 21 | Spectral Width   | (6666.7 Hz, 29683.0 Hz)            |
| 22 | Lowest           | (-326.3 Hz, -378.8 Hz)             |
| 23 | Nucleus          | ( <sup>1</sup> H, <sup>13</sup> C) |
| 24 | Acquired Size    | (2048, 128)                        |
| 25 | Spectral Size    | (2048, 512)                        |

Table 40 ROESY experimental parameters of compound **11**

|   | Parameter | Value (f2, f1)                |
|---|-----------|-------------------------------|
| 1 | Comment   | RG-66 CDCl <sub>3</sub> roesy |
| 2 | Origin    | Bruker BioSpin GmbH           |
| 3 | Owner     | nmrsu                         |
| 4 | Site      |                               |

|    |                   |                          |
|----|-------------------|--------------------------|
| 5  | Spectrometer      | spect                    |
| 6  | Author            |                          |
| 7  | Solvent           | CDCl <sub>3</sub>        |
| 8  | Temperature       | 293.5 K                  |
| 9  | Pulse Sequence    | roesyhpp.2               |
| 10 | Experiment        | 2D-ROESY                 |
| 11 | Number of Scans   | 24                       |
| 12 | Receiver Gain     | 59                       |
| 13 | Relaxation Delay  | 2.0000 sec               |
| 14 | Pulse Width       | 12.0000 $\mu$ sec        |
| 15 | Acquisition Time  | 0.1577 sec               |
| 16 | Acquisition Date  | 2014-01-04T15:48:12      |
| 17 | Modification Date | 2014-01-04T17:08:44      |
| 18 | Spectrometer      | (500.15 MHz, 500.15 MHz) |
| 19 | Spectral Width    | (6493.5 Hz, 6502.0Hz)    |
| 20 | Lowest Frequency  | (-245.9 Hz, -250.1 Hz)   |
| 21 | Nucleus           | (1H, 1H)                 |
| 22 | Acquired Size     | (1024, 84)               |
| 23 | Spectral Size     | (1024, 1024)             |

Table 41 HSQC experimental parameters of compound **12**

|    | Parameter        | Value (f2, f1)               |
|----|------------------|------------------------------|
| 1  | Comment          | RG-94 CDCl <sub>3</sub> HSQC |
| 2  | Origin           | Bruker BioSpin GmbH          |
| 3  | Owner            | nmrsu                        |
| 4  | Site             |                              |
| 5  | Spectrometer     | spect                        |
| 6  | Author           |                              |
| 7  | Solvent          | CDCl <sub>3</sub>            |
| 8  | Temperature      | 297.0 K                      |
| 9  | Pulse Sequence   | hsqcedetgpsisp2.3            |
| 10 | Experiment       | 2D-HSQC-EDITED               |
| 11 | Number of Scans  | 4                            |
| 12 | Receiver Gain    | 185                          |
| 13 | Relaxation Delay | 2.0000 sec                   |



|    |                   |                          |
|----|-------------------|--------------------------|
| 14 | Pulse Width       | 12.0000 $\mu$ sec        |
| 15 | Acquisition Time  | 0.1577 sec               |
| 16 | Acquisition Date  | 2014-11-04T10:20:46      |
| 17 | Modification Date | 2014-11-04T10:44:55      |
| 18 | Spectrometer      | (500.15 MHz, 125.76 MHz) |
| 19 | Spectral Width    | (6493.5 Hz, 27670.6 Hz)  |
| 20 | Lowest Frequency  | (-245.9 Hz, -630.2 Hz)   |
| 21 | Nucleus           | (1H, 13C)                |
| 22 | Acquired Size     | (1024, 166)              |
| 23 | Spectral Size     | (1024, 1024)             |

Table 42  $^1\text{H}$ - $^1\text{H}$  COSY experimental parameters of compound **12**

|    | Parameter         | Value (f2, f1)             |
|----|-------------------|----------------------------|
| 1  | Comment           | RG-94 $\text{CDCl}_3$ COSY |
| 2  | Origin            | Bruker BioSpin GmbH        |
| 3  | Owner             | nmrsu                      |
| 4  | Site              |                            |
| 5  | Spectrometer      | spect                      |
| 6  | Author            |                            |
| 7  | Solvent           | $\text{CDCl}_3$            |
| 8  | Temperature       | 294.2                      |
| 9  | Pulse Sequence    | cosygpppqf                 |
| 10 | Experiment        | 2D-COSY                    |
| 11 | Number of Scans   | 8                          |
| 12 | Receiver Gain     | 59                         |
| 13 | Relaxation Delay  | 2.0000 sec                 |
| 14 | Pulse Width       | 12.0000 $\mu$ sec          |
| 15 | Acquisition Time  | 0.1278 sec                 |
| 16 | Acquisition Date  | 2015-01-14T18:47:07        |
| 17 | Modification Date | 2015-01-14T19:24:01        |
| 18 | Spectrometer      | (500.15 MHz, 500.15 MHz)   |
| 19 | Spectral Width    | (8012.8 Hz, 8002.4 Hz)     |
| 20 | Lowest Frequency  | (-505.4 Hz, -500.2 Hz)     |
| 21 | Nucleus           | (1H, 1H)                   |

|    |               |              |
|----|---------------|--------------|
| 22 | Acquired Size | (1024, 128)  |
| 23 | Spectral Size | (1024, 1024) |

Table 43 HMBC experimental parameters of compound **12**

|    | Parameter         | Value (f2, f1)               |
|----|-------------------|------------------------------|
| 1  | Comment           | RG-94 CDCl <sub>3</sub> HMBC |
| 2  | Origin            | Bruker BioSpin GmbH          |
| 3  | Owner             | nmrsu                        |
| 4  | Site              |                              |
| 5  | Spectrometer      | spect                        |
| 6  | Author            |                              |
| 7  | Solvent           | CDCl <sub>3</sub>            |
| 8  | Temperature       | 294.0 K                      |
| 9  | Pulse Sequence    | hmbcgpndqf                   |
| 10 | Experiment        | 2D-HMBC                      |
| 11 | Number of Scans   | 24                           |
| 12 | Receiver Gain     | 185                          |
| 13 | Relaxation Delay  | 1.5000 sec                   |
| 14 | Pulse Width       | 12.0000 $\mu$ sec            |
| 15 | Acquisition Time  | 0.2731 sec                   |
| 16 | Acquisition Date  | 2015-01-14T17:12:41          |
| 17 | Modification Date | 2015-01-14T18:46:26          |
| 18 | Spectrometer      | (500.15 MHz, 125.76 MHz)     |
| 19 | Spectral Width    | (7500.0 Hz, 29683.0 Hz)      |
| 20 | Lowest Frequency  | (-249.0 Hz, -378.8 Hz)       |
| 21 | Nucleus           | (1H, 13C)                    |
| 22 | Acquired Size     | (2048, 128)                  |
| 23 | Spectral Size     | (2048, 512)                  |

Table 44 ROESY experimental parameters of compound **12**

|   | Parameter    | Value (f2, f1)                |
|---|--------------|-------------------------------|
| 1 | Comment      | RG-94 CDCl <sub>3</sub> roesy |
| 2 | Origin       | Bruker BioSpin GmbH           |
| 3 | Owner        | nmrsu                         |
| 4 | Site         |                               |
| 5 | Spectrometer | spect                         |

|    |                   |                          |
|----|-------------------|--------------------------|
| 6  | Author            |                          |
| 7  | Solvent           | CDCl <sub>3</sub>        |
| 8  | Temperature       | 294.2 K                  |
| 9  | Pulse Sequence    | roesyphpp.2              |
| 10 | Experiment        | 2D-ROESY                 |
| 11 | Number of Scans   | 24                       |
| 12 | Receiver Gain     | 59                       |
| 13 | Relaxation Delay  | 2.0000 sec               |
| 14 | Pulse Width       | 12.0000 $\mu$ sec        |
| 15 | Acquisition Time  | 0.1278 sec               |
| 16 | Acquisition Date  | 2015-01-14T19:26:17      |
| 17 | Modification Date | 2015-01-14T22:17:14      |
| 18 | Spectrometer      | (500.15 MHz, 500.15 MHz) |
| 19 | Spectral Width    | (8012.8 Hz, 8002.4 Hz)   |
| 20 | Lowest Frequency  | (-505.4 Hz, -500.2 Hz)   |
| 21 | Nucleus           | (1H, 1H)                 |
| 22 | Acquired Size     | (1024, 181)              |
| 23 | Spectral Size     | (1024, 1024)             |

Table 45 HSQC experimental parameters of compound **13**

|    | Parameter        | Value (f2, f1)                |
|----|------------------|-------------------------------|
| 1  | Comment          | RG-101 CDCl <sub>3</sub> HSQC |
| 2  | Origin           | Bruker BioSpin GmbH           |
| 3  | Owner            | nmrsu                         |
| 4  | Site             |                               |
| 5  | Spectrometer     | spect                         |
| 6  | Author           |                               |
| 7  | Solvent          | CDCl <sub>3</sub>             |
| 8  | Temperature      | 295.4 K                       |
| 9  | Pulse Sequence   | hsqcedetgpsisp2.3             |
| 10 | Experiment       | 2D-HSQC-EDITED                |
| 11 | Number of Scans  | 4                             |
| 12 | Receiver Gain    | 185                           |
| 13 | Relaxation Delay | 2.0000 sec                    |
| 14 | Pulse Width      | 12.0000 $\mu$ sec             |
| 15 | Acquisition Time | 0.1712 sec                    |

|    |                   |                          |
|----|-------------------|--------------------------|
| 16 | Acquisition Date  | 2015-01-12T16:43:06      |
| 17 | Modification Date | 2015-01-12T16:54:24      |
| 18 | Spectrometer      | (500.15 MHz, 125.76 MHz) |
| 19 | Spectral Width    | (5980.9 Hz, 27670.4 Hz)  |
| 20 | Lowest Frequency  | (-239.6 Hz, -630.1 Hz)   |
| 21 | Nucleus           | (1H, 13C)                |
| 22 | Acquired Size     | (1024, 77)               |
| 23 | Spectral Size     | (1024, 512)              |

Table 46 <sup>1</sup>H-<sup>1</sup>H COSY experimental parameters of compound **13**

|    | Parameter         | Value (f2, f1)                |
|----|-------------------|-------------------------------|
| 1  | Comment           | RG-101 CDCl <sub>3</sub> COSY |
| 2  | Origin            | Bruker BioSpin GmbH           |
| 3  | Owner             | nmrsu                         |
| 4  | Site              |                               |
| 5  | Spectrometer      | spect                         |
| 6  | Author            |                               |
| 7  | Solvent           | CDCl <sub>3</sub>             |
| 8  | Temperature       | 294.6 K                       |
| 9  | Pulse Sequence    | cosygpppqf                    |
| 10 | Experiment        | 2D-COSY                       |
| 11 | Number of Scans   | 20                            |
| 12 | Receiver Gain     | 59                            |
| 13 | Relaxation Delay  | 2.0000 sec                    |
| 14 | Pulse Width       | 12.0000 $\mu$ sec             |
| 15 | Acquisition Time  | 0.1278 sec                    |
| 16 | Acquisition Date  | 2015-03-02T23:19:26           |
| 17 | Modification Date | 2015-03-03T00:51:40           |
| 18 | Spectrometer      | (500.15 MHz, 500.15 MHz)      |
| 19 | Spectral Width    | (8012.8 MHz, 8002.4 MHz)      |
| 20 | Lowest Frequency  | (-505.4 Hz, -500.2 Hz)        |
| 21 | Nucleus           | (1H, 1H)                      |
| 22 | Acquired Size     | (1024, 128)                   |
| 23 | Spectral Size     | (1024, 1024)                  |

Table 47 HMBC experimental parameters of compound **13**

|    | Parameter         | Value (f2, f1)                |
|----|-------------------|-------------------------------|
| 1  | Comment           | RG-101 CDCl <sub>3</sub> HMBC |
| 2  | Origin            | Bruker BioSpin GmbH           |
| 3  | Owner             | nmrsu                         |
| 4  | Site              |                               |
| 5  | Spectrometer      | spect                         |
| 6  | Author            |                               |
| 7  | Solvent           | CDCl <sub>3</sub>             |
| 8  | Temperature       | 294.9 K                       |
| 9  | Pulse Sequence    | hmbcgpndqf                    |
| 10 | Experiment        | 2D-HMBC                       |
| 11 | Number of Scans   | 40                            |
| 12 | Receiver Gain     | 185                           |
| 13 | Relaxation Delay  | 1.5000 sec                    |
| 14 | Pulse Width       | 12.0000 $\mu$ sec             |
| 15 | Acquisition Time  | 0.2731 sec                    |
| 16 | Acquisition Date  | 2015-03-02T20:42:06           |
| 17 | Modification Date | 2015-03-02T23:18:18           |
| 18 | Spectrometer      | (500.15 MHz, 125.76 MHz)      |
| 19 | Spectral Width    | (7500.0 Hz, 29683.0 Hz)       |
| 20 | Lowest Frequency  | (-249.0 Hz, -378.8 Hz)        |
| 21 | Nucleus           | (1H, 13C)                     |
| 22 | Acquired Size     | (2048, 128)                   |
| 23 | Spectral Size     | (2048, 512)                   |

Table 48 ROESY experimental parameters of compound **13**

|   | Parameter    | Value (f2, f1)                 |
|---|--------------|--------------------------------|
| 1 | Comment      | RG-101 CDCl <sub>3</sub> roesy |
| 2 | Origin       | Bruker BioSpin GmbH            |
| 3 | Owner        | nmrsu                          |
| 4 | Site         |                                |
| 5 | Spectrometer | spect                          |

|    |                   |                          |
|----|-------------------|--------------------------|
| 6  | Author            |                          |
| 7  | Solvent           | CDCl <sub>3</sub>        |
| 8  | Temperature       | 294.6 K                  |
| 9  | Pulse Sequence    | roesyhpp.2               |
| 10 | Experiment        | 2D-ROESY                 |
| 11 | Number of Scans   | 40                       |
| 12 | Receiver Gain     | 59                       |
| 13 | Relaxation Delay  | 2.0000 sec               |
| 14 | Pulse Width       | 12.0000 $\mu$ sec        |
| 15 | Acquisition Time  | 0.1278 sec               |
| 16 | Acquisition Date  | 2015-03-03T00:54:34      |
| 17 | Modification Date | 2015-03-03T07:38:33      |
| 18 | Spectrometer      | (500.15 MHz, 500.15 MHz) |
| 19 | Spectral Width    | (8012.8 Hz, 8002.4 Hz)   |
| 20 | Lowest Frequency  | (-505.4 Hz, -500.2 Hz)   |
| 21 | Nucleus           | (1H, 1H)                 |
| 22 | Acquired Size     | (1024, 256)              |
| 23 | Spectral Size     | (1024, 1024)             |

Table 49 HSQC experimental parameters of compound **14**

|    | Parameter        | Value (f2, f1)                |
|----|------------------|-------------------------------|
| 1  | Comment          | RG-110 CDCl <sub>3</sub> HSQC |
| 2  | Origin           | Bruker BioSpin GmbH           |
| 3  | Owner            | nmrsu                         |
| 4  | Site             |                               |
| 5  | Spectrometer     | spect                         |
| 6  | Author           |                               |
| 7  | Solvent          | CDCl <sub>3</sub>             |
| 8  | Temperature      | 295.2 K                       |
| 9  | Pulse Sequence   | hsqcedetgpsisp2.3             |
| 10 | Experiment       | 2D-HSQC-EDITED                |
| 11 | Number of Scans  | 4                             |
| 12 | Receiver Gain    | 185                           |
| 13 | Relaxation Delay | 2.0000 sec                    |
| 14 | Pulse Width      | 12.0000 $\mu$ sec             |

|    |                   |                          |
|----|-------------------|--------------------------|
| 15 | Acquisition Time  | 0.1712 sec               |
| 16 | Acquisition Date  | 2015-03-02T15:00:22      |
| 17 | Modification Date | 2015-03-02T15:12:38      |
| 18 | Spectrometer      | (500.15 MHz, 125.76 MHz) |
| 19 | Spectral Width    | (5980.9 Hz, 27670.4 Hz)  |
| 20 | Lowest Frequency  | (-239.6 Hz, -630.1 Hz)   |
| 21 | Nucleus           | (1H, 13C)                |
| 22 | Acquired Size     | (1024, 84)               |
| 23 | Spectral Size     | (1024, 512)              |

Table 50 <sup>1</sup>H-<sup>1</sup>H COSY experimental parameters of compound 14

|    | Parameter         | Value (f2, f1)                |
|----|-------------------|-------------------------------|
| 1  | Comment           | RG-110 CDCl <sub>3</sub> COSY |
| 2  | Origin            | Bruker BioSpin GmbH           |
| 3  | Owner             | nmrsu                         |
| 4  | Site              |                               |
| 5  | Spectrometer      | spect                         |
| 6  | Author            |                               |
| 7  | Solvent           | CDCl <sub>3</sub>             |
| 8  | Temperature       | 294.2                         |
| 9  | Pulse Sequence    | cosygpppqf                    |
| 10 | Experiment        | 2D-COSY                       |
| 11 | Number of Scans   | 8                             |
| 12 | Receiver Gain     | 59                            |
| 13 | Relaxation Delay  | 2.0000 sec                    |
| 14 | Pulse Width       | 14.3200 $\mu$ sec             |
| 15 | Acquisition Time  | 0.2273 sec                    |
| 16 | Acquisition Date  | 2015-04-10T12:36:32           |
| 17 | Modification Date | 2015-04-10T13:54:42           |
| 18 | Spectrometer      | (500.15 MHz, 500.15 MHz)      |
| 19 | Spectral Width    | (4504.5 Hz, 4501.4 Hz)        |
| 20 | Lowest Frequency  | (-1.6 Hz, 0.0 Hz)             |
| 21 | Nucleus           | (1H, 1H)                      |
| 22 | Acquired Size     | (1024, 256)                   |
| 23 | Spectral Size     | (1024, 1024)                  |

Table 51 HMBC experimental parameters of compound **14**

|    | Parameter         | Value (f2, f1)                |
|----|-------------------|-------------------------------|
| 1  | Comment           | RG-110 CDCl <sub>3</sub> HMBC |
| 2  | Origin            | Bruker BioSpin GmbH           |
| 3  | Owner             | nmrsu                         |
| 4  | Site              |                               |
| 5  | Spectrometer      | spect                         |
| 6  | Author            |                               |
| 7  | Solvent           | CDCl <sub>3</sub>             |
| 8  | Temperature       | 294.2 K                       |
| 9  | Pulse Sequence    | hmbcgpndqf                    |
| 10 | Experiment        | 2D-HMBC                       |
| 11 | Number of Scans   | 24                            |
| 12 | Receiver Gain     | 185                           |
| 13 | Relaxation Delay  | 1.5000 sec                    |
| 14 | Pulse Width       | 14.3200 $\mu$ sec             |
| 15 | Acquisition Time  | 0.4547 sec                    |
| 16 | Acquisition Date  | 2015-04-10T10:52:50           |
| 17 | Modification Date | 2015-04-10T12:35:49           |
| 18 | Spectrometer      | (500.15 MHz, 125.76 MHz)      |
| 19 | Spectral Width    | (4504.5 Hz, 23897.7 Hz)       |
| 20 | Lowest Frequency  | (-1.6 Hz, -1.4 Hz)            |
| 21 | Nucleus           | (1H, 13C)                     |
| 22 | Acquired Size     | (2048, 128)                   |
| 23 | Spectral Size     | (2048, 512)                   |

Table 52 ROESY experimental parameters of compound **14**

|   | Parameter | Value (f2, f1)                 |
|---|-----------|--------------------------------|
| 1 | Comment   | RG-110 CDCl <sub>3</sub> roesy |
| 2 | Origin    | Bruker BioSpin GmbH            |
| 3 | Owner     | nmrsu                          |
| 4 | Site      |                                |



|    |                   |                          |
|----|-------------------|--------------------------|
| 5  | Spectrometer      | spect                    |
| 6  | Author            |                          |
| 7  | Solvent           | CDCl <sub>3</sub>        |
| 8  | Temperature       | 294.3 K                  |
| 9  | Pulse Sequence    | roesyphpp.2              |
| 10 | Experiment        | 2D-ROESY                 |
| 11 | Number of Scans   | 24                       |
| 12 | Receiver Gain     | 59                       |
| 13 | Relaxation Delay  | 2.0000 sec               |
| 14 | Pulse Width       | 14.3200 $\mu$ sec        |
| 15 | Acquisition Time  | 0.2273 sec               |
| 16 | Acquisition Date  | 2015-04-10T13:57:04      |
| 17 | Modification Date | 2015-04-10T17:44:24      |
| 18 | Spectrometer      | (500.15 MHz, 500.15 MHz) |
| 19 | Spectral Width    | (4504.5 Hz, 4501.4 Hz)   |
| 20 | Lowest Frequency  | (-1.6 Hz, 0.0 Hz)        |
| 21 | Nucleus           | (1H, 1H)                 |
| 22 | Acquired Size     | (1024, 230)              |
| 23 | Spectral Size     | (1024, 1024)             |
